# Supplementary material for: Cornulacin: a new isoflavone from Cornulaca monacantha and its isolation, structure elucidation and cytotoxicity through EGFR-mediated apoptosis
Source: Royal Society of Chemistry journal article supplement (doi:10.1039/d4md00524d), 2024-01-01
Supplement: d4md00524d1.pdf [file d4md00524d1.pdf]

## Supplementary Information

### **Cornulacin: A New Isoflavone from *Cornulaca monacantha* Isolation, Structure Elucidation and Cytotoxicity through EGFR- Mediated apoptosis**

Ahmed M. Badawy<sup>a,†</sup>, Enas E. Eltamany<sup>b,†</sup>, Rodina M. Hussien<sup>a</sup>, Osama  
G. Mohamed<sup>c,d</sup>, Mayada M. El-Ayouty<sup>a</sup>, Mohamed S. Nafie<sup>e,f</sup>, Ashootosh  
Tripathi<sup>d,g</sup>, and Safwat A. Ahmed<sup>b,\*</sup>

<sup>a</sup>*Department of Pharmacognosy, Faculty of Pharmacy, Sinai University,  
El-Arish 45511, Egypt; [ahmed.badawy@su.edu.eg](mailto:ahmed.badawy@su.edu.eg) (A.M.B.);  
[Rodina.atia@su.edu.eg](mailto:Rodina.atia@su.edu.eg) (R.M.H.); [miada.mohamed@su.edu.eg](mailto:miada.mohamed@su.edu.eg) (M.M.E.)*

<sup>b</sup>*Department of Pharmacognosy, Faculty of Pharmacy, Suez Canal  
University, Ismailia 41522, Egypt; [enas\\_mostafa@pharm.suez.edu.eg](mailto:enas_mostafa@pharm.suez.edu.eg),  
[Enastamany@gmail.com](mailto:Enastamany@gmail.com) (E.E.E.)*

<sup>c</sup>*Pharmacognosy Department, Faculty of Pharmacy, Cairo University,  
Kasr el Aini St., Cairo 11562, Egypt;  
[osama.mohamed@pharma.cu.edu.eg](mailto:osama.mohamed@pharma.cu.edu.eg) (O.G.M.)*

<sup>d</sup>*Natural Products Discovery Core, Life Sciences Institute, University of  
Michigan, Ann Arbor, MI 48109, USA,*

<sup>e</sup>*Chemistry Department, College of Sciences, University of Sharjah,  
Sharjah (P. O. Box 27272), United Arab Emirates;*

<sup>f</sup>*Chemistry Department (Biochemistry program), Faculty of Science, Suez  
Canal University, Ismailia, 41522, Egypt;  
[mohamed\\_nafie@science.suez.edu.eg](mailto:mohamed_nafie@science.suez.edu.eg) (M.S.N.)*

<sup>g</sup>*Department of Medicinal Chemistry, College of Pharmacy, University  
of Michigan, Ann Arbor, MI 48109, USA; [ashtri@umich.edu](mailto:ashtri@umich.edu) (A.T.)*

*Correspondence: [safwat\\_aa@yahoo.com](mailto:safwat_aa@yahoo.com) or  
[safwat\\_ahmed@pharm.suez.edu.eg](mailto:safwat_ahmed@pharm.suez.edu.eg) (S.A.A.); Tel.: +20-010-92638387;  
Fax: +20-064-32307*

## List of figures

|                                                                                                                                |    |
|--------------------------------------------------------------------------------------------------------------------------------|----|
| Figure. S 1 HRMS of compound <b>1</b> .....                                                                                    | 4  |
| Figure. S 2 <sup>1</sup> H-NMR spectrum of compound <b>1</b> (400 MHz, DMSO- <i>d</i> <sub>6</sub> ).....                      | 5  |
| Figure. S 3 Partial expansion of <sup>1</sup> H-NMR spectrum of compound <b>1</b> (400 MHz, DMSO- <i>d</i> <sub>6</sub> )..... | 6  |
| Figure. S 4 Partial expansion of <sup>1</sup> H-NMR spectrum of compound <b>1</b> (400 MHz, DMSO- <i>d</i> <sub>6</sub> )..... | 7  |
| Figure. S 5 Partial expansion of <sup>1</sup> H-NMR spectrum of compound <b>1</b> (400 MHz, DMSO- <i>d</i> <sub>6</sub> )..... | 8  |
| Figure. S 6 <sup>13</sup> C-NMR spectrum of compound <b>1</b> (100MHz, DMSO- <i>d</i> <sub>6</sub> ).....                      | 9  |
| Figure. S 7 Partial expansion of <sup>13</sup> C-NMR spectrum of compound <b>1</b> (100MHz, DMSO- <i>d</i> <sub>6</sub> )..... | 10 |
| Figure. S 8 Partial expansion of <sup>13</sup> C-NMR spectrum of compound <b>1</b> (100MHz, DMSO- <i>d</i> <sub>6</sub> )..... | 11 |
| Figure. S 9 Partial expansion of <sup>13</sup> C-NMR spectrum of compound <b>1</b> (100MHz, DMSO- <i>d</i> <sub>6</sub> )..... | 12 |
| Figure. S 10 HSQC of compound <b>1</b> .....                                                                                   | 13 |
| Figure. S 11 Partial expansion of HSQC of compound <b>1</b> .....                                                              | 14 |
| Figure. S 12 Partial expansion of HSQC of compound <b>1</b> .....                                                              | 15 |
| Figure. S 13 HMBC of compound <b>1</b> .....                                                                                   | 16 |
| Figure. S 14 Partial expansion of HMBC of compound <b>1</b> .....                                                              | 17 |
| Figure. S 15 Partial expansion of HMBC of compound <b>1</b> .....                                                              | 18 |
| Figure. S 16 Partial expansion of HMBC of compound <b>1</b> .....                                                              | 19 |
| Figure. S 17 Partial expansion of HMBC of compound <b>1</b> .....                                                              | 20 |
| Figure. S 18 <sup>1</sup> H-NMR spectrum of compound <b>2</b> (600 MHz, CD <sub>3</sub> OD).....                               | 21 |
| Figure. S 19 Partial expansion of <sup>1</sup> H-NMR spectrum of compound <b>2</b> (600 MHz, CD <sub>3</sub> OD).....          | 22 |
| Figure. S 20 Partial expansion of <sup>1</sup> H-NMR spectrum of compound <b>2</b> (600 MHz, CD <sub>3</sub> OD).....          | 23 |
| Figure. S 21 Partial expansion of <sup>1</sup> H-NMR spectrum of compound <b>2</b> (600 MHz, CD <sub>3</sub> OD).....          | 24 |
| Figure. S 22 Partial expansion of <sup>1</sup> H-NMR spectrum of compound <b>2</b> (600 MHz, CD <sub>3</sub> OD).....          | 25 |
| Figure. S 23 <sup>13</sup> C-NMR spectrum of compound <b>2</b> (600 MHz, CD <sub>3</sub> OD).....                              | 26 |
| Figure. S 24 <sup>1</sup> H-NMR spectrum of compound <b>3</b> (600 MHz, CD <sub>3</sub> OD).....                               | 27 |
| Figure. S 25 Partial expansion of <sup>1</sup> H-NMR spectrum of compound <b>3</b> (600 MHz, CD <sub>3</sub> OD).....          | 28 |
| Figure. S 26 Partial expansion of <sup>1</sup> H-NMR spectrum of compound <b>3</b> (600 MHz, CD <sub>3</sub> OD).....          | 29 |
| Figure. S 27 Partial expansion of <sup>1</sup> H-NMR spectrum of compound <b>3</b> (600 MHz, CD <sub>3</sub> OD).....          | 30 |
| Figure. S 28 Partial expansion of <sup>1</sup> H-NMR spectrum of compound <b>3</b> (600 MHz, CD <sub>3</sub> OD).....          | 31 |
| Figure. S 29 <sup>13</sup> C-NMR spectrum of compound <b>3</b> (150 MHz, CD <sub>3</sub> OD).....                              | 32 |
| Figure. S 30 Partial expansion of <sup>13</sup> C-NMR spectrum of compound <b>3</b> (150 MHz, CD <sub>3</sub> OD).....         | 33 |
| Figure. S 31 Partial expansion of <sup>13</sup> C-NMR spectrum of compound <b>3</b> (150 MHz, CD <sub>3</sub> OD).....         | 34 |
| Figure. S 32 Partial expansion of <sup>13</sup> C-NMR spectrum of compound <b>3</b> (150 MHz, CD <sub>3</sub> OD).....         | 35 |
| Figure. S 33 <sup>1</sup> H-NMR spectrum of compound <b>4</b> (300 MHz, CD <sub>3</sub> OD).....                               | 36 |
| Figure. S 34 Partial expansion of <sup>1</sup> H-NMR spectrum of compound <b>4</b> (300 MHz, CD <sub>3</sub> OD).....          | 37 |
| Figure. S 35 <sup>1</sup> H-NMR spectrum of compound <b>5</b> (600 MHz, CD <sub>3</sub> OD).....                               | 38 |
| Figure. S 36 Partial expansion of <sup>1</sup> H-NMR spectrum of compound <b>5</b> (600 MHz, CD <sub>3</sub> OD).....          | 39 |
| Figure. S 37 Partial expansion of <sup>1</sup> H-NMR spectrum of compound <b>5</b> (600 MHz, CD <sub>3</sub> OD).....          | 40 |
| Figure. S 38 Partial expansion of <sup>1</sup> H-NMR spectrum of compound <b>5</b> (600 MHz, CD <sub>3</sub> OD).....          | 41 |
| Figure. S 39 <sup>13</sup> C-NMR spectrum of compound <b>5</b> (150 MHz, CD <sub>3</sub> OD).....                              | 42 |
| Figure. S 40 Partial expansion of <sup>13</sup> C-NMR spectrum of compound <b>5</b> (150 MHz, CD <sub>3</sub> OD).....         | 43 |
| Figure. S 41 Partial expansion of <sup>13</sup> C-NMR spectrum of compound <b>5</b> (150 MHz, CD <sub>3</sub> OD).....         | 44 |
| Figure. S 42 Partial expansion of <sup>13</sup> C-NMR spectrum of compound <b>5</b> (150 MHz, CD <sub>3</sub> OD).....         | 45 |
| Figure. S 43 Partial expansion of <sup>13</sup> C-NMR spectrum of compound <b>5</b> (150 MHz, CD <sub>3</sub> OD).....         | 46 |

|                                                                                                                               |    |
|-------------------------------------------------------------------------------------------------------------------------------|----|
| Figure. S 44 Partial expansion of $^{13}\text{C}$ -NMR spectrum of compound <b>5</b> (150 MHz, $\text{CD}_3\text{OD}$ ) ..... | 47 |
| Figure. S 45 Partial expansion of $^{13}\text{C}$ -NMR spectrum of compound <b>5</b> (150 MHz, $\text{CD}_3\text{OD}$ ) ..... | 48 |
| Figure. S 46 $^1\text{H}$ -NMR spectrum of compound <b>6</b> (600 MHz, $\text{CD}_3\text{OD}$ ).....                          | 49 |
| Figure. S 47 Partial expansion of $^1\text{H}$ -NMR spectrum of compound <b>6</b> (600 MHz, $\text{CD}_3\text{OD}$ ) .....    | 50 |
| Figure. S 48 Partial expansion of $^1\text{H}$ -NMR spectrum of compound <b>6</b> (600 MHz, $\text{CD}_3\text{OD}$ ) .....    | 51 |
| Figure. S 49 Partial expansion of $^1\text{H}$ -NMR spectrum of compound <b>6</b> (600 MHz, $\text{CD}_3\text{OD}$ ) .....    | 52 |
| Figure. S 50 Partial expansion of $^1\text{H}$ -NMR spectrum of compound <b>6</b> (600 MHz, $\text{CD}_3\text{OD}$ ) .....    | 53 |
| Figure. S 51 Partial expansion of $^1\text{H}$ -NMR spectrum of compound <b>6</b> (600 MHz, $\text{CD}_3\text{OD}$ ) .....    | 54 |
| Figure. S 52 Partial expansion of $^1\text{H}$ -NMR spectrum of compound <b>6</b> (600 MHz, $\text{CD}_3\text{OD}$ ) .....    | 55 |
| Figure. S 53 Partial expansion of $^1\text{H}$ -NMR spectrum of compound <b>6</b> (600 MHz, $\text{CD}_3\text{OD}$ ) .....    | 56 |
| Figure. S 54 Partial expansion of $^1\text{H}$ -NMR spectrum of compound <b>6</b> (600 MHz, $\text{CD}_3\text{OD}$ ) .....    | 57 |
| Figure. S 55 $^{13}\text{C}$ -NMR spectrum of compound <b>6</b> (150 MHz, $\text{CD}_3\text{OD}$ ).....                       | 58 |
| Figure. S 56 Partial expansion of $^{13}\text{C}$ -NMR spectrum of compound <b>6</b> (150 MHz, $\text{CD}_3\text{OD}$ ) ..... | 59 |
| Figure. S 57 Partial expansion of $^{13}\text{C}$ -NMR spectrum of compound <b>6</b> (150 MHz, $\text{CD}_3\text{OD}$ ) ..... | 60 |
| Figure. S 58 Partial expansion of $^{13}\text{C}$ -NMR spectrum of compound <b>6</b> (150 MHz, $\text{CD}_3\text{OD}$ ) ..... | 61 |
| Figure. S 59 Partial expansion of $^{13}\text{C}$ -NMR spectrum of compound <b>6</b> (150 MHz, $\text{CD}_3\text{OD}$ ) ..... | 62 |
| Figure. S 60 Partial expansion of $^{13}\text{C}$ -NMR spectrum of compound <b>6</b> (150 MHz, $\text{CD}_3\text{OD}$ ) ..... | 63 |

### List of tables:

|                                                                                                                                                                         |    |
|-------------------------------------------------------------------------------------------------------------------------------------------------------------------------|----|
| Table. S 1 $^1\text{H}$ (600 MHz) and $^{13}\text{C}$ (150 MHz) NMR spectroscopic data of compound <b>2</b> ( $\text{CD}_3\text{OD}$ $\delta$ in ppm, $J$ in Hz).....   | 64 |
| Table. S 2 $^1\text{H}$ (600 MHz) and $^{13}\text{C}$ (150 MHz) NMR spectroscopic data of compound <b>3</b> ( $\text{CD}_3\text{OD}$ , $\delta$ in ppm, $J$ in Hz)..... | 64 |
| Table. S 3 $^1\text{H}$ (300 MHz) NMR spectroscopic data of compound <b>4</b> ( $\text{CD}_3\text{OD}$ , $\delta$ in ppm, $J$ in Hz).....                               | 65 |
| Table. S 4 $^1\text{H}$ (600 MHz) and $^{13}\text{C}$ (150 MHz) NMR spectroscopic data of compound <b>5</b> ( $\text{CD}_3\text{OD}$ , $\delta$ in ppm, $J$ in Hz)..... | 66 |
| Table. S 5 $^1\text{H}$ (600 MHz) and $^{13}\text{C}$ (150 MHz) NMR spectroscopic data of compound <b>6</b> ( $\text{CD}_3\text{OD}$ , $\delta$ in ppm, $J$ in Hz)..... | 67 |

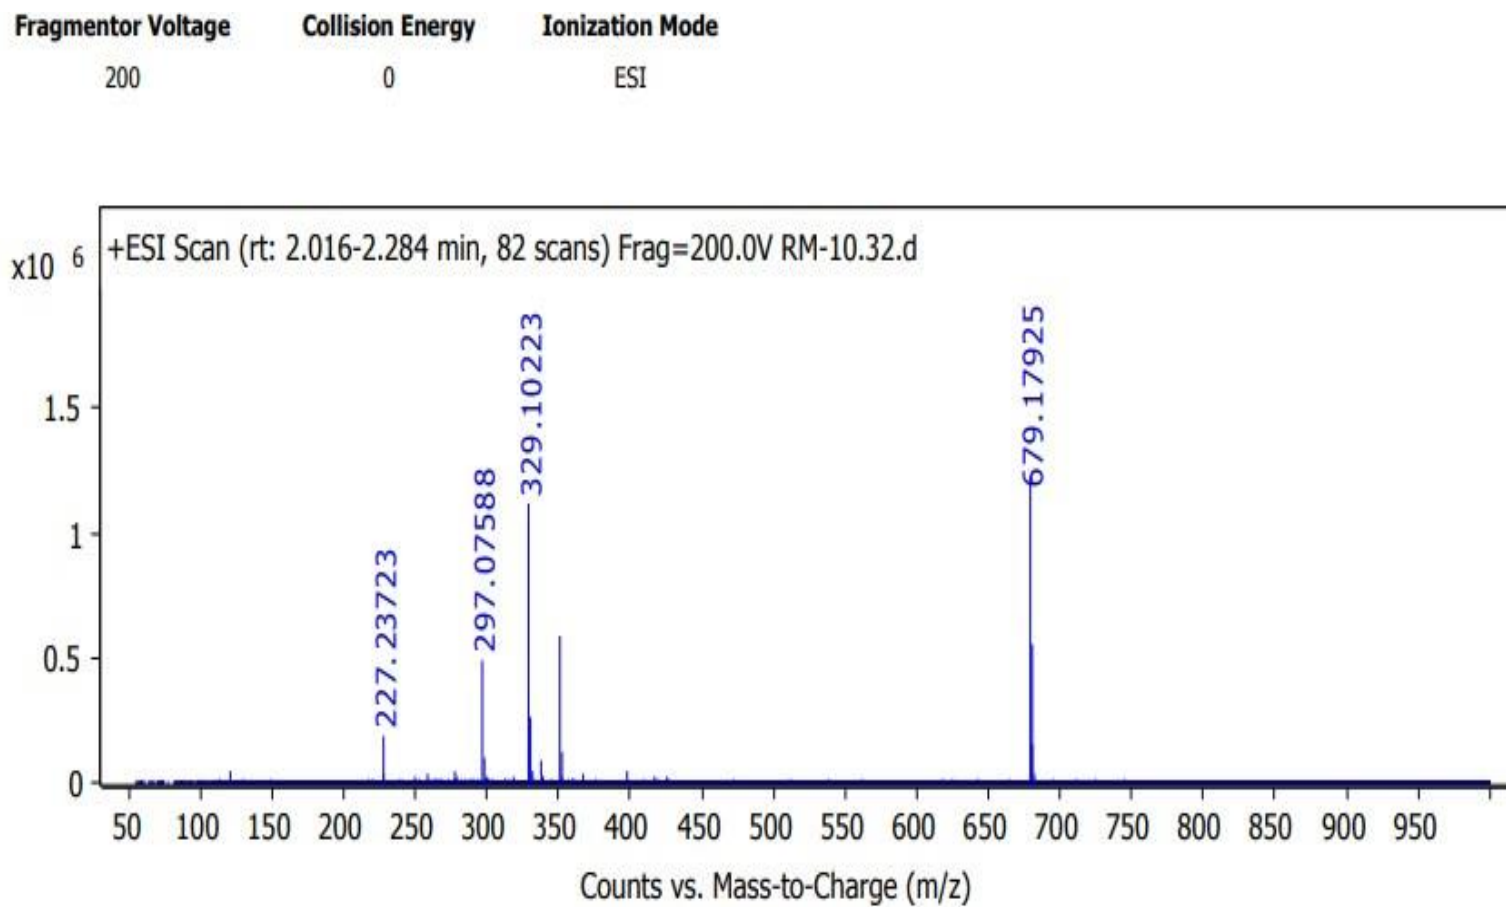

**Figure. S 1 HRMS of compound 1**

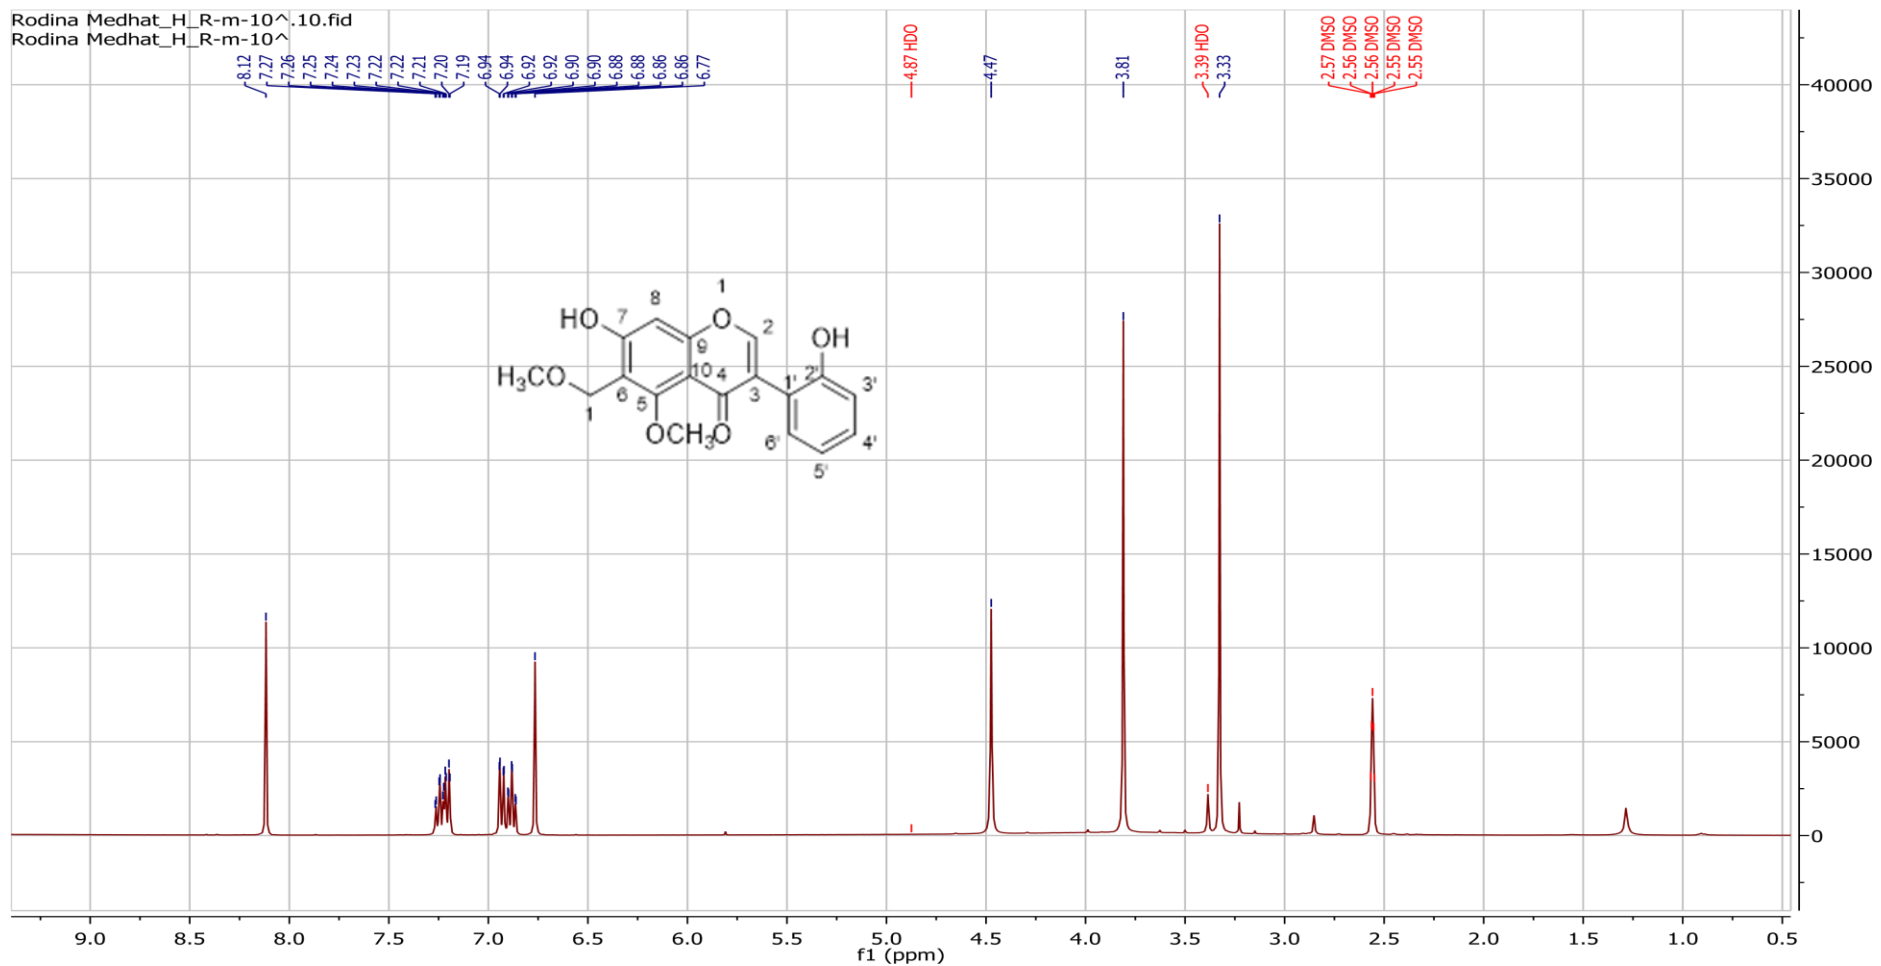

Figure. S  $^1\text{H}$ -NMR spectrum of compound 1 (400 MHz, DMSO-*d*<sub>6</sub>)

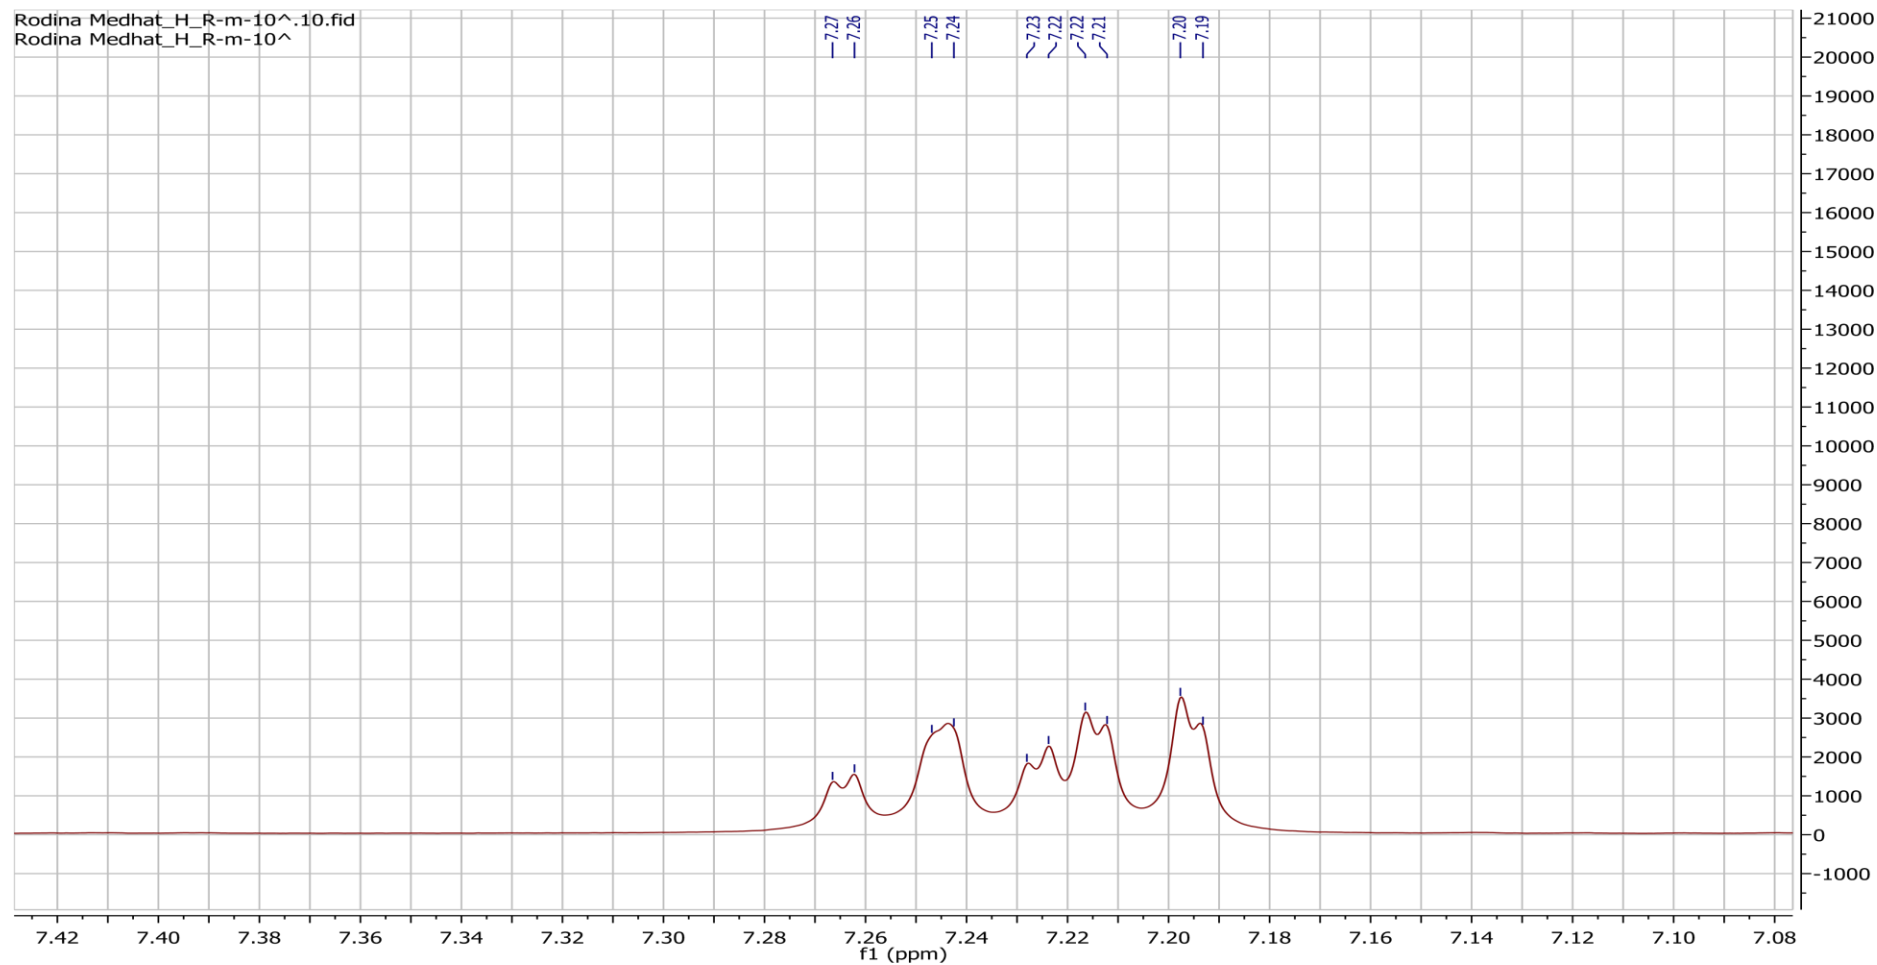

**Figure. S 3 Partial expansion of <sup>1</sup>H-NMR spectrum of compound 1 (400 MHz, DMSO-*d*<sub>6</sub>)**

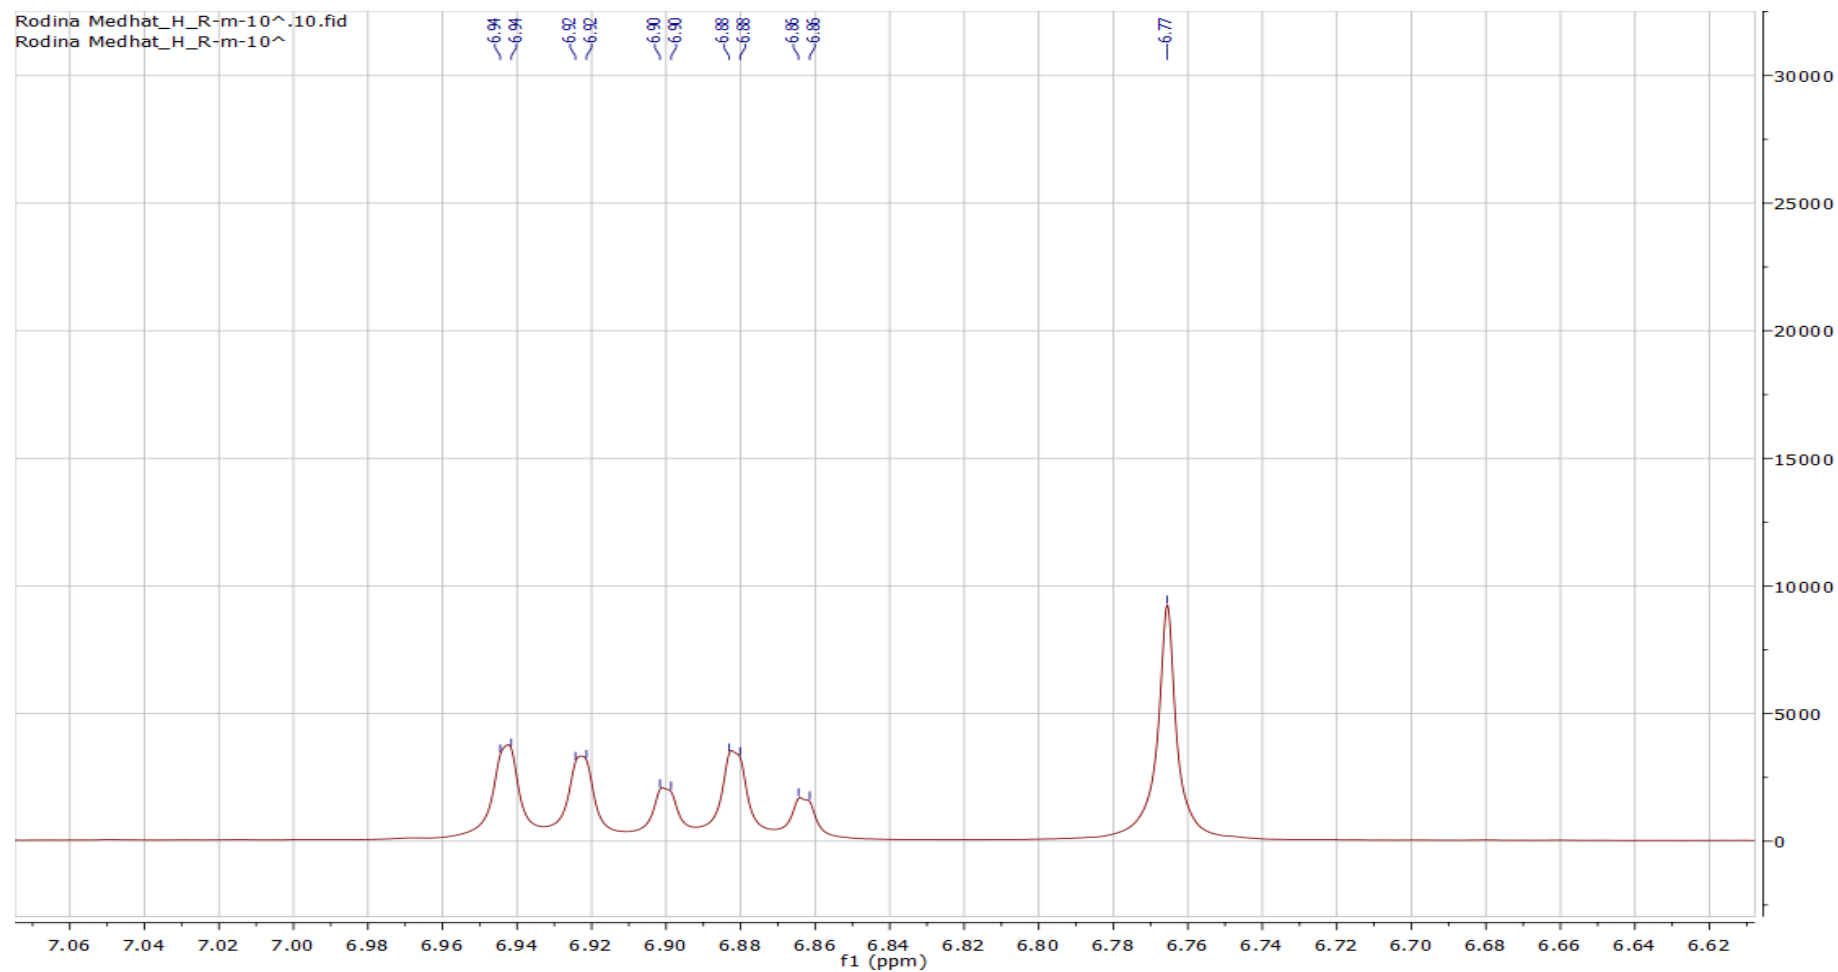

**Figure. S 4** Partial expansion of <sup>1</sup>H-NMR spectrum of compound 1 (400 MHz, DMSO-*d*<sub>6</sub>)

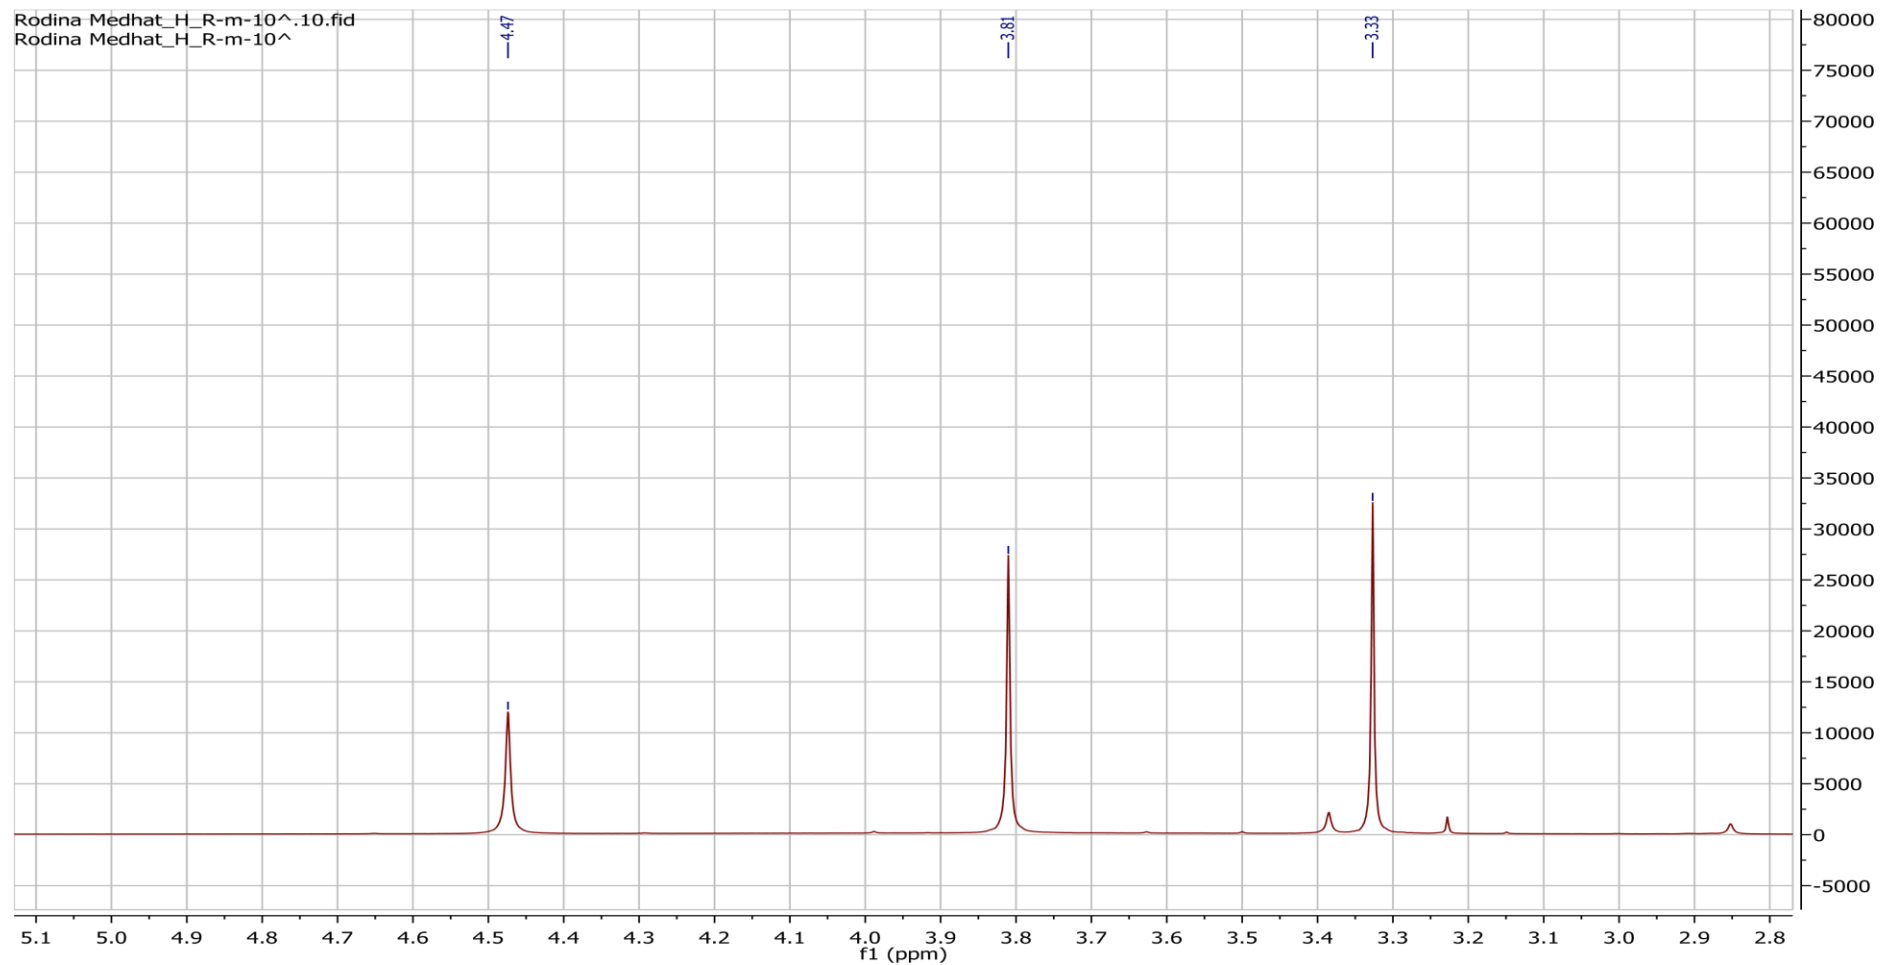

**Figure. S 5** Partial expansion of <sup>1</sup>H-NMR spectrum of compound 1 (400 MHz, DMSO-*d*<sub>6</sub>)



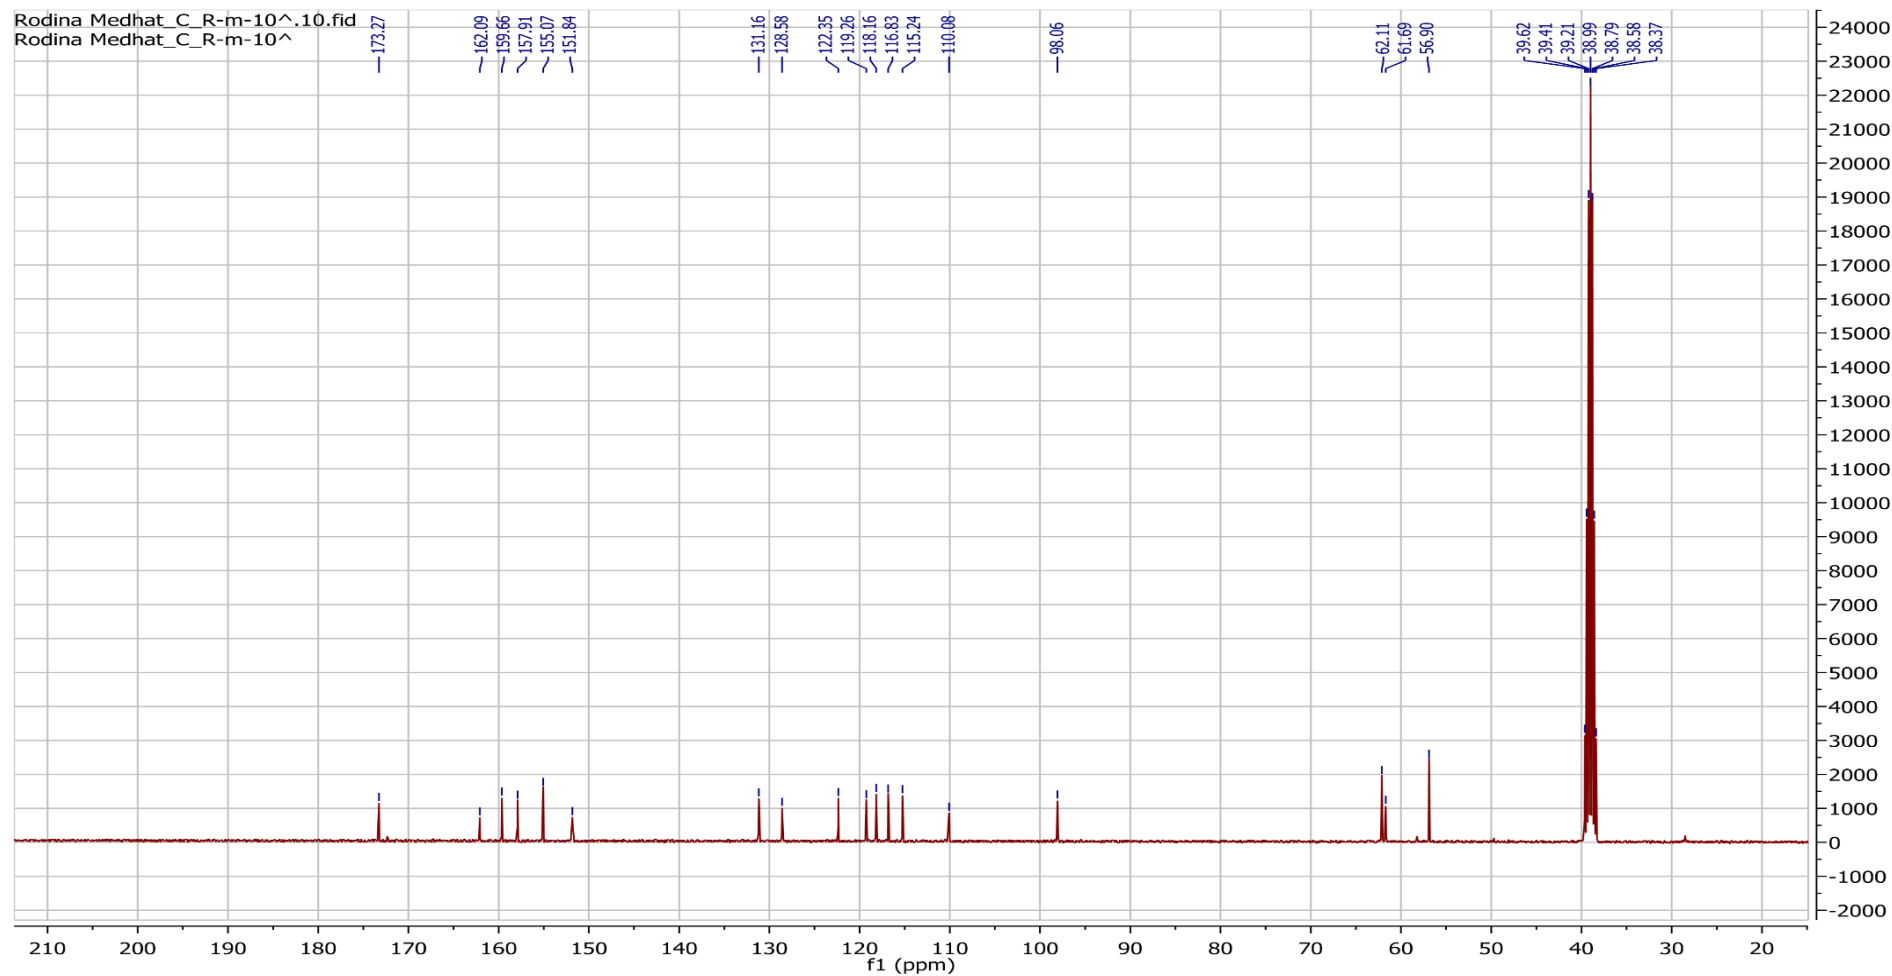

**Figure. S 6**  $^{13}\text{C}$ -NMR spectrum of compound 1 (100MHz, DMSO-*d*<sub>6</sub>)

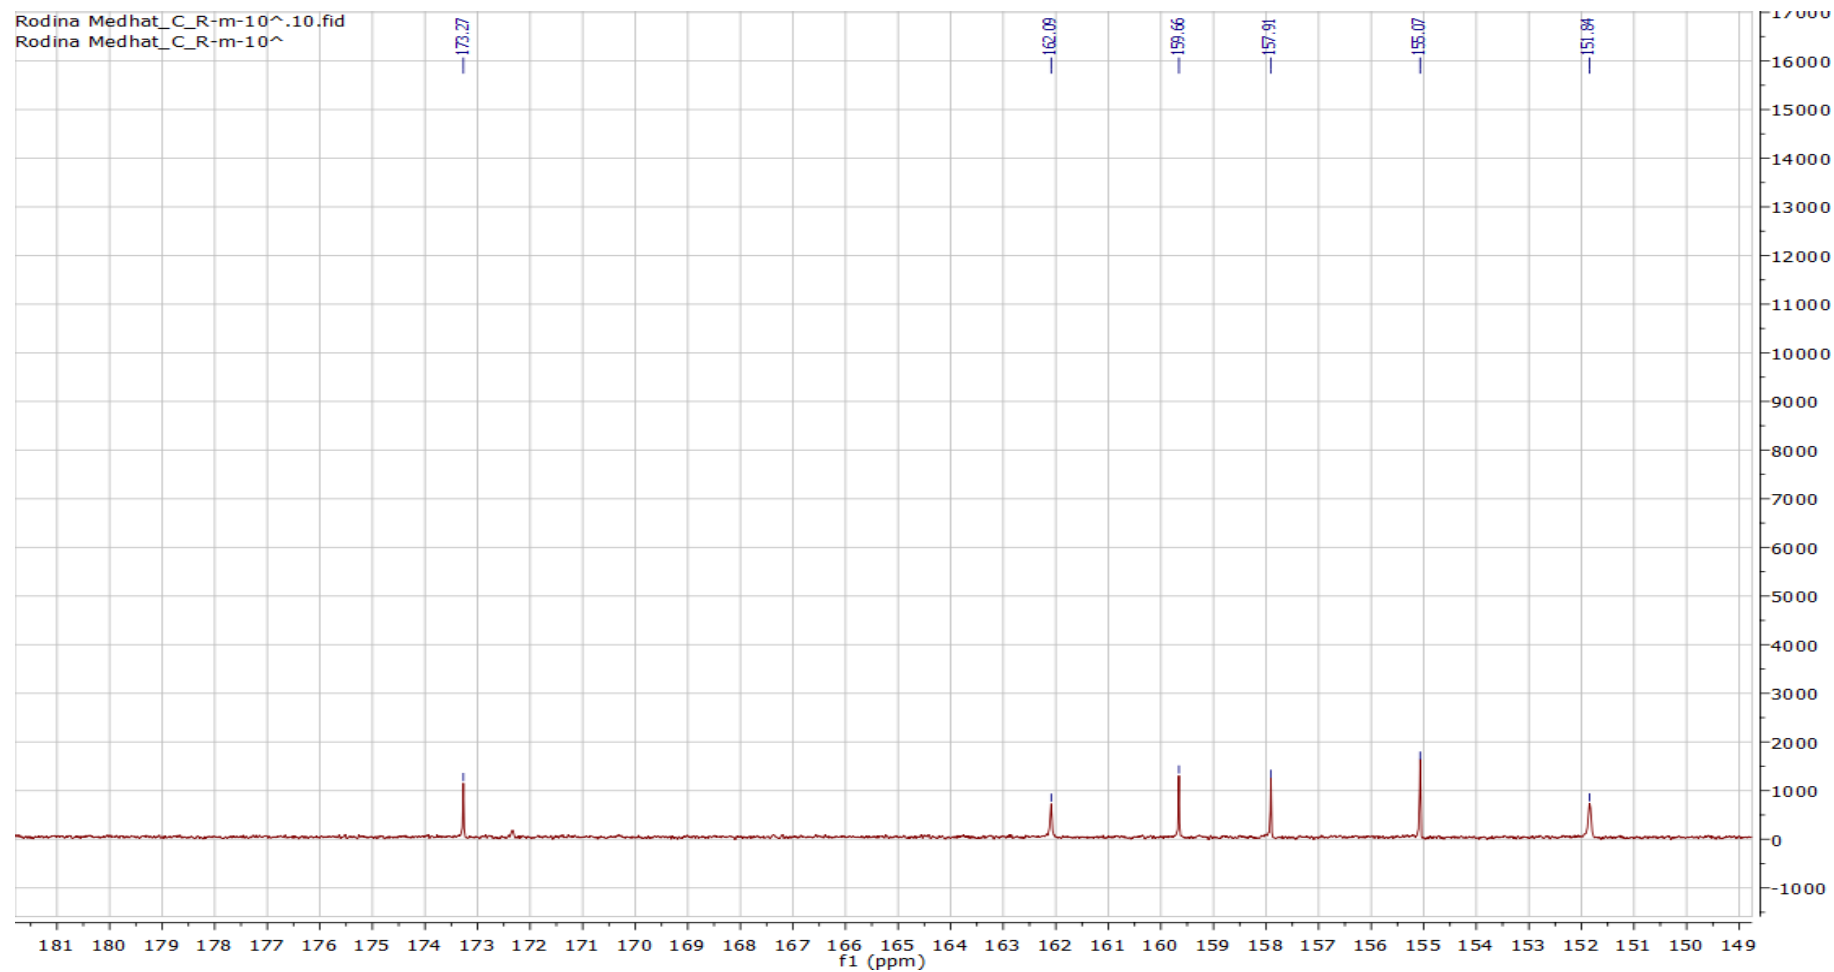

**Figure. S 7 Partial expansion of <sup>13</sup>C-NMR spectrum of compound 1 (100MHz, DMSO-*d*<sub>6</sub>)**

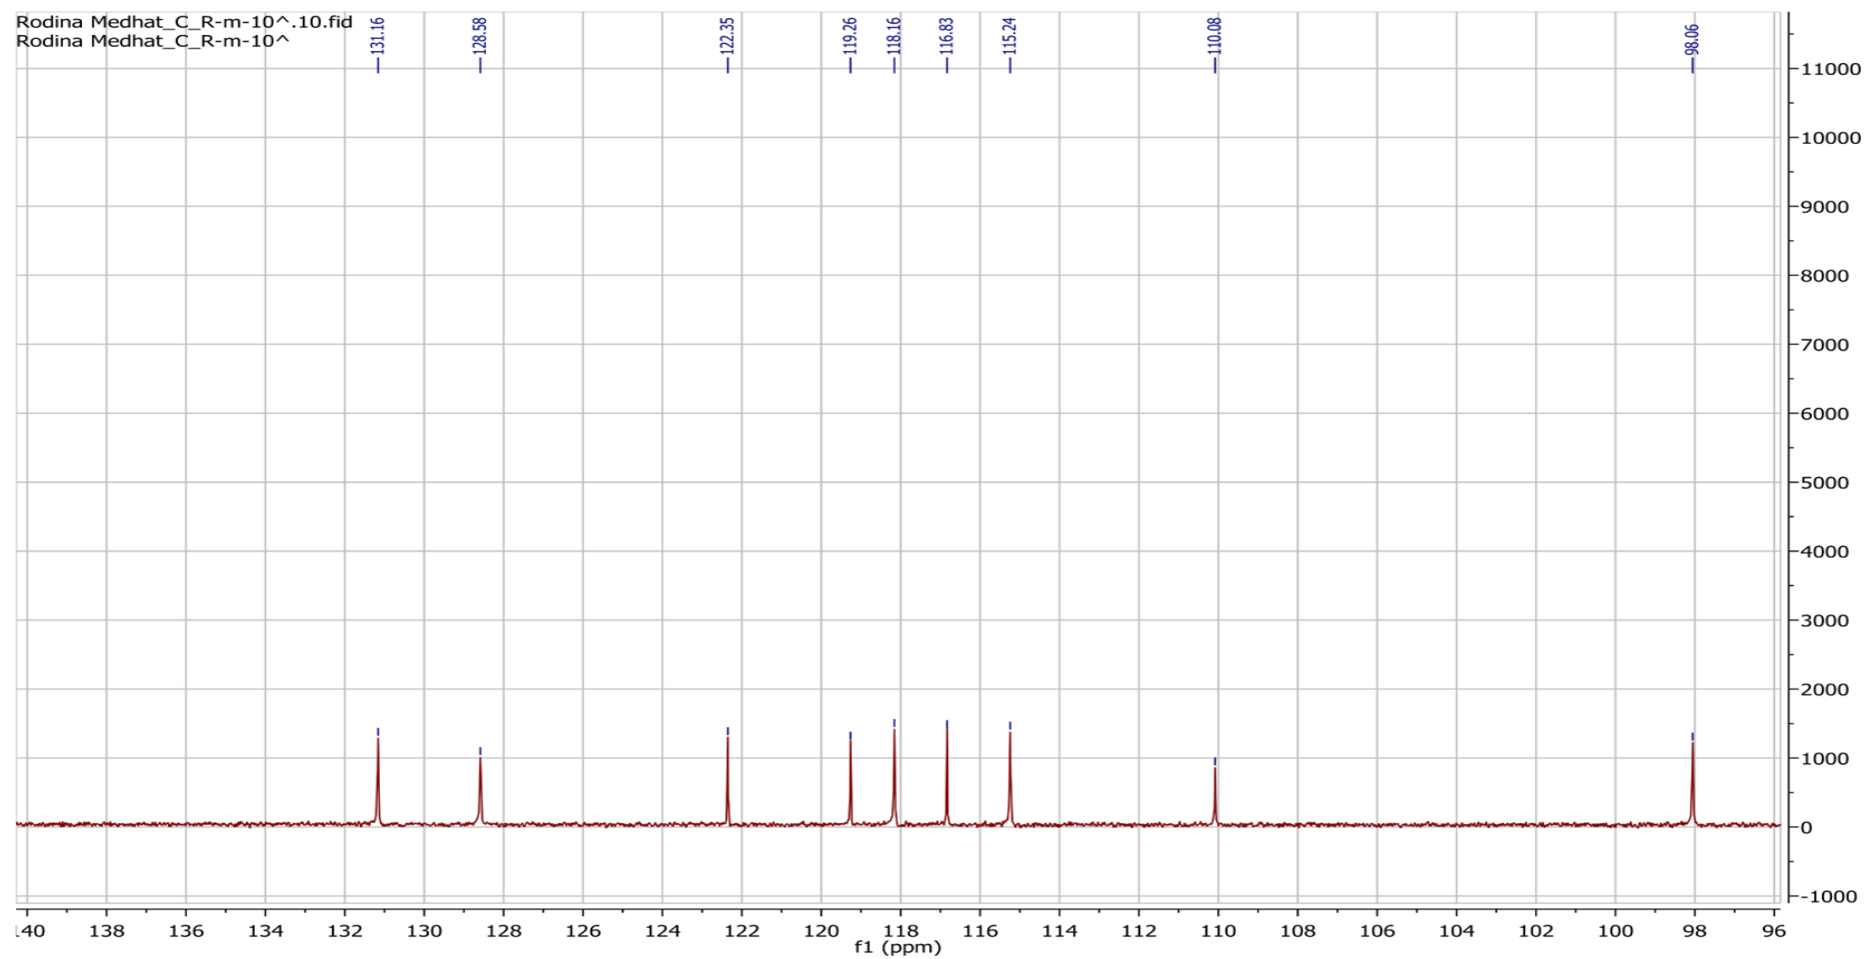

**Figure. S 8 Partial expansion of <sup>13</sup>C-NMR spectrum of compound 1 (100MHz, DMSO-*d*<sub>6</sub>)**

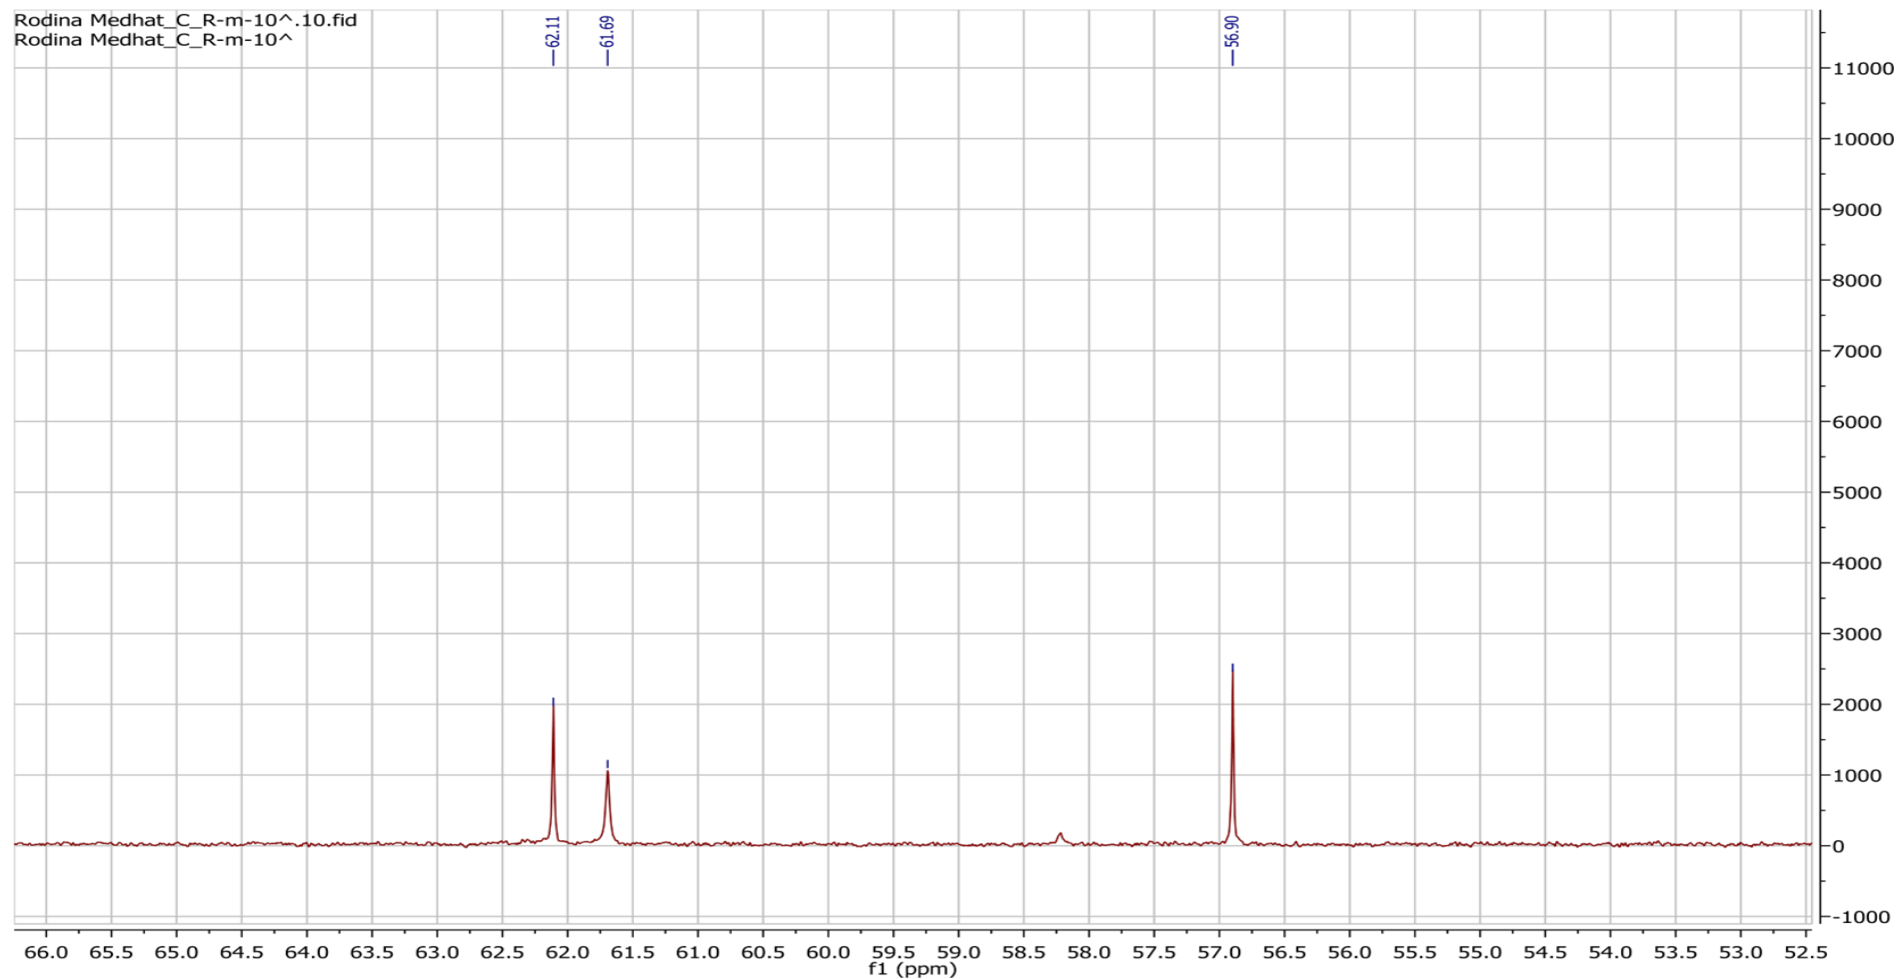

**Figure. S 9** Partial expansion of  $^{13}\text{C}$ -NMR spectrum of compound 1 (100MHz, DMSO-*d*<sub>6</sub>)

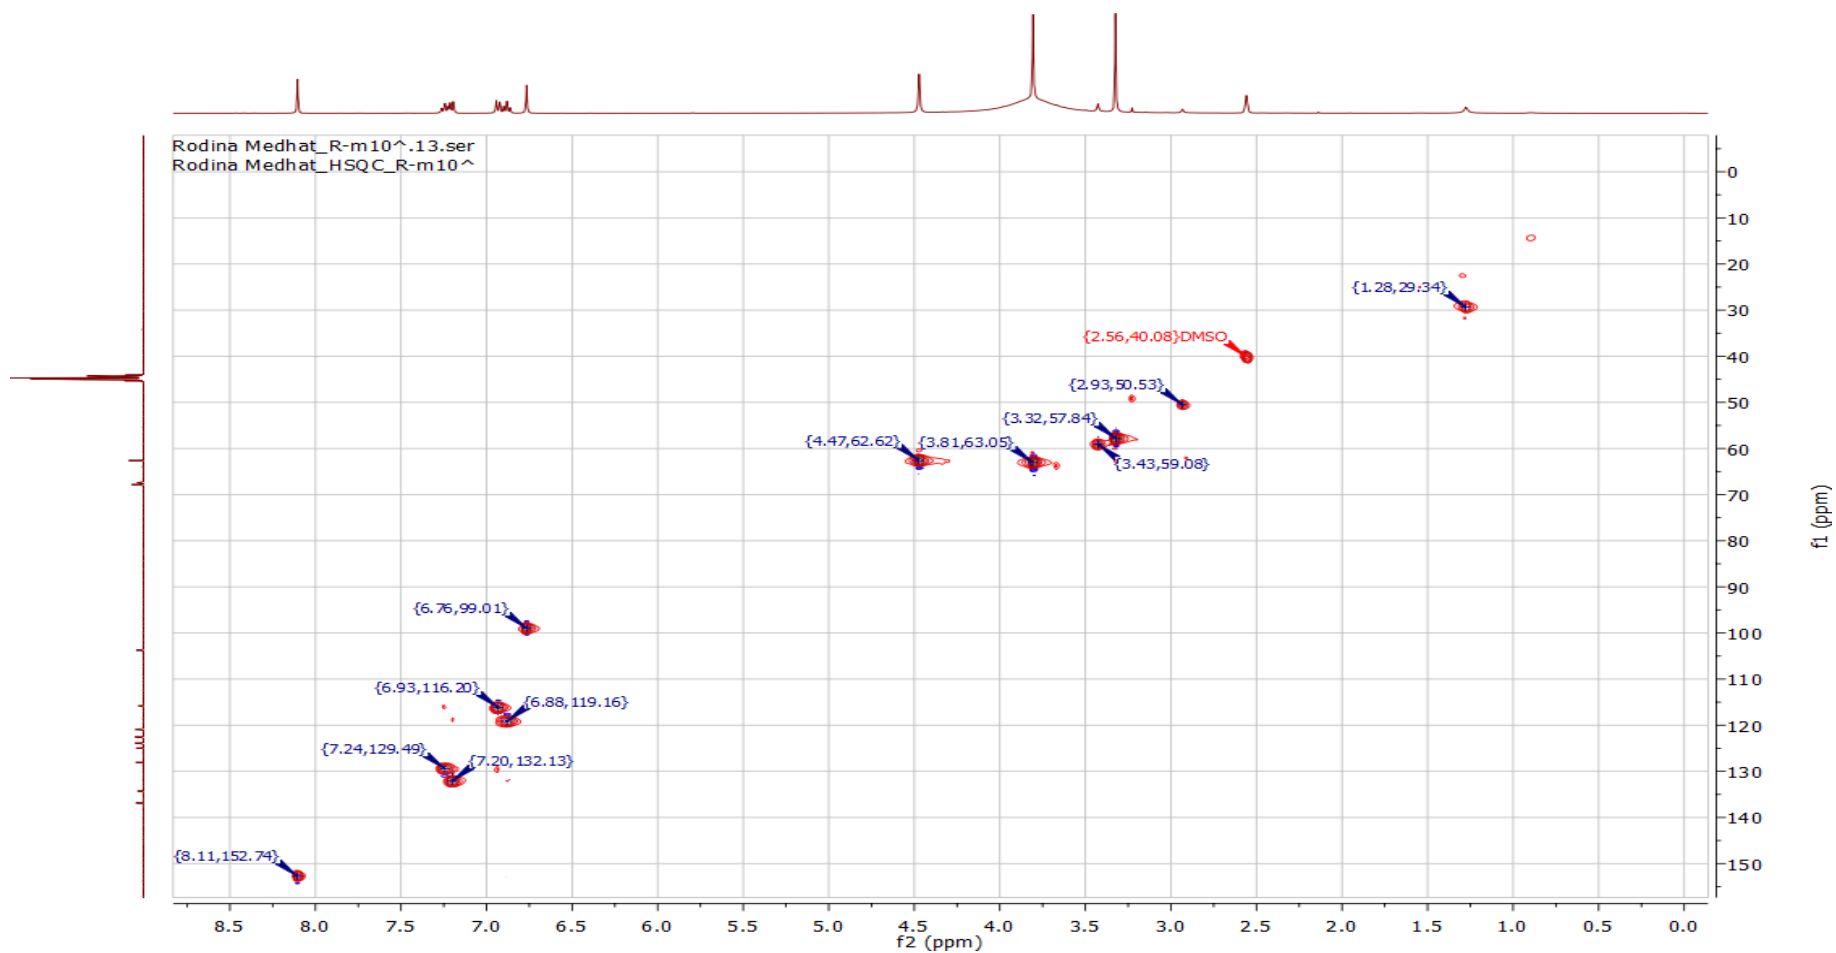

Figure. S 10 HSQC of compound 1

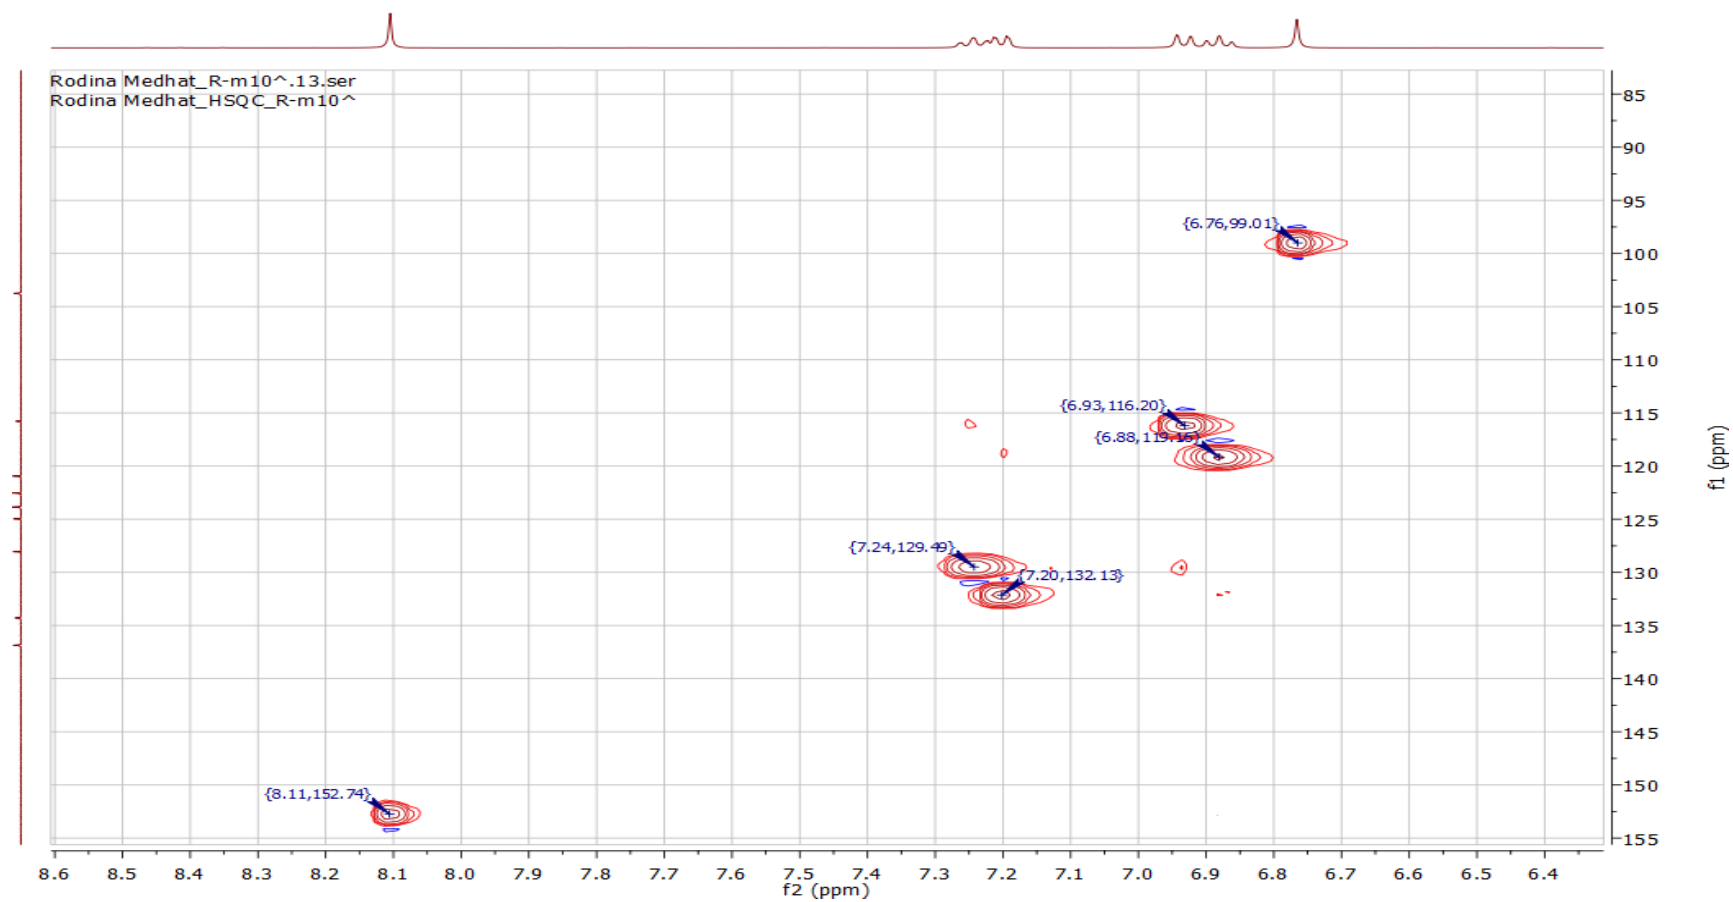

**Figure. S 11 Partial expansion of HSQC of compound 1**

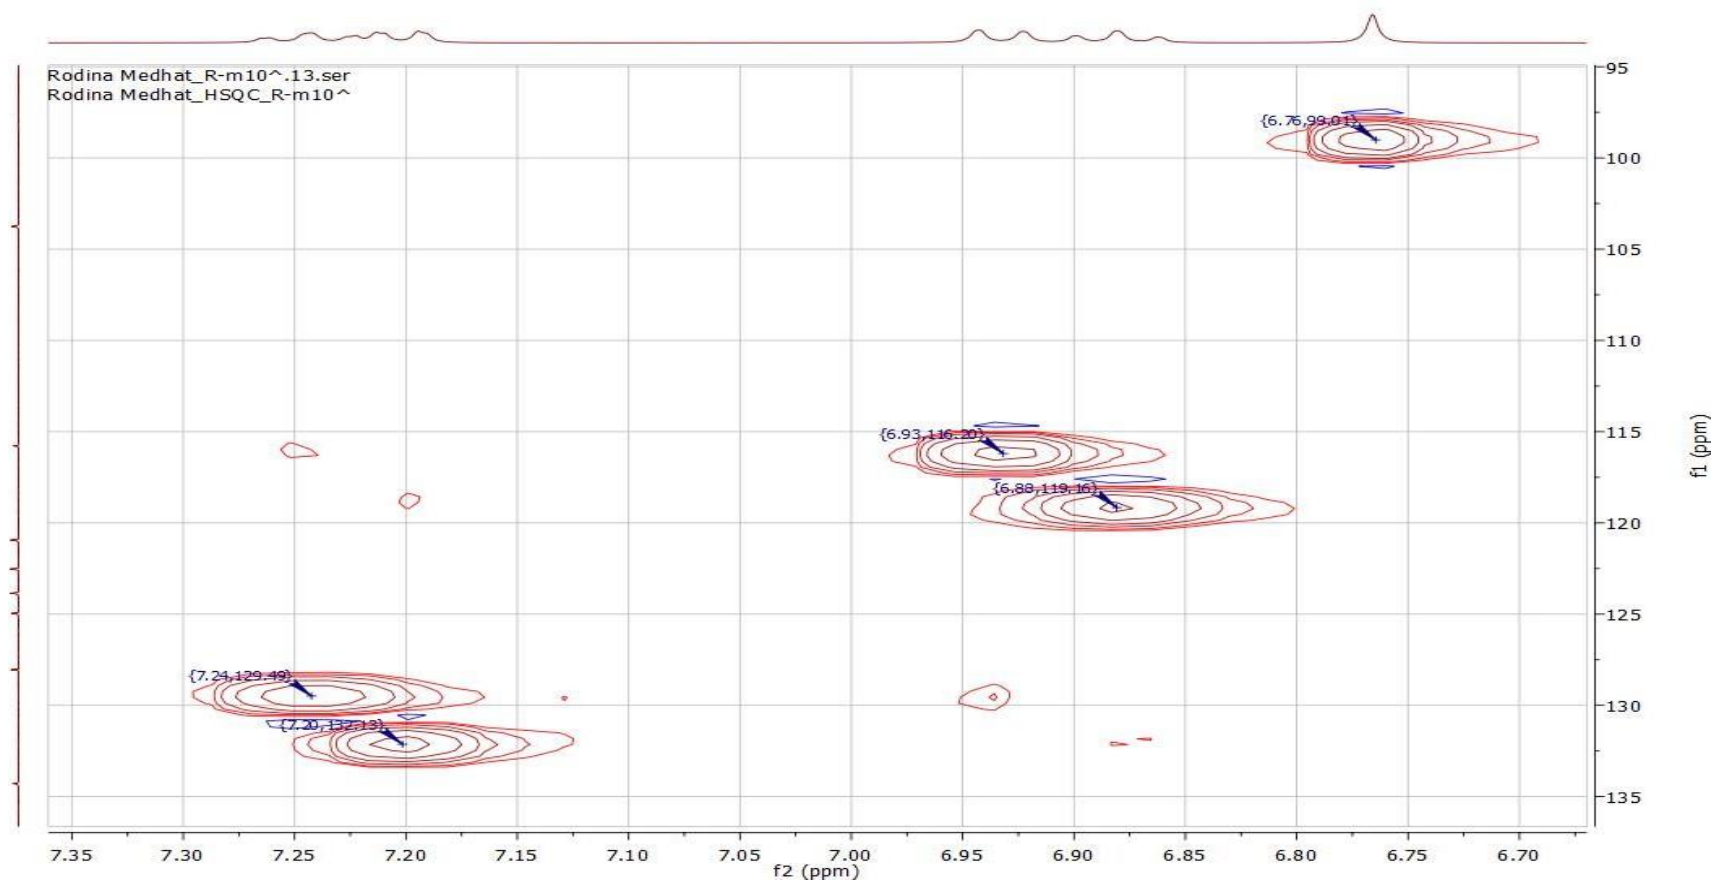

**Figure. S 12** Partial expansion of HSQC of compound 1

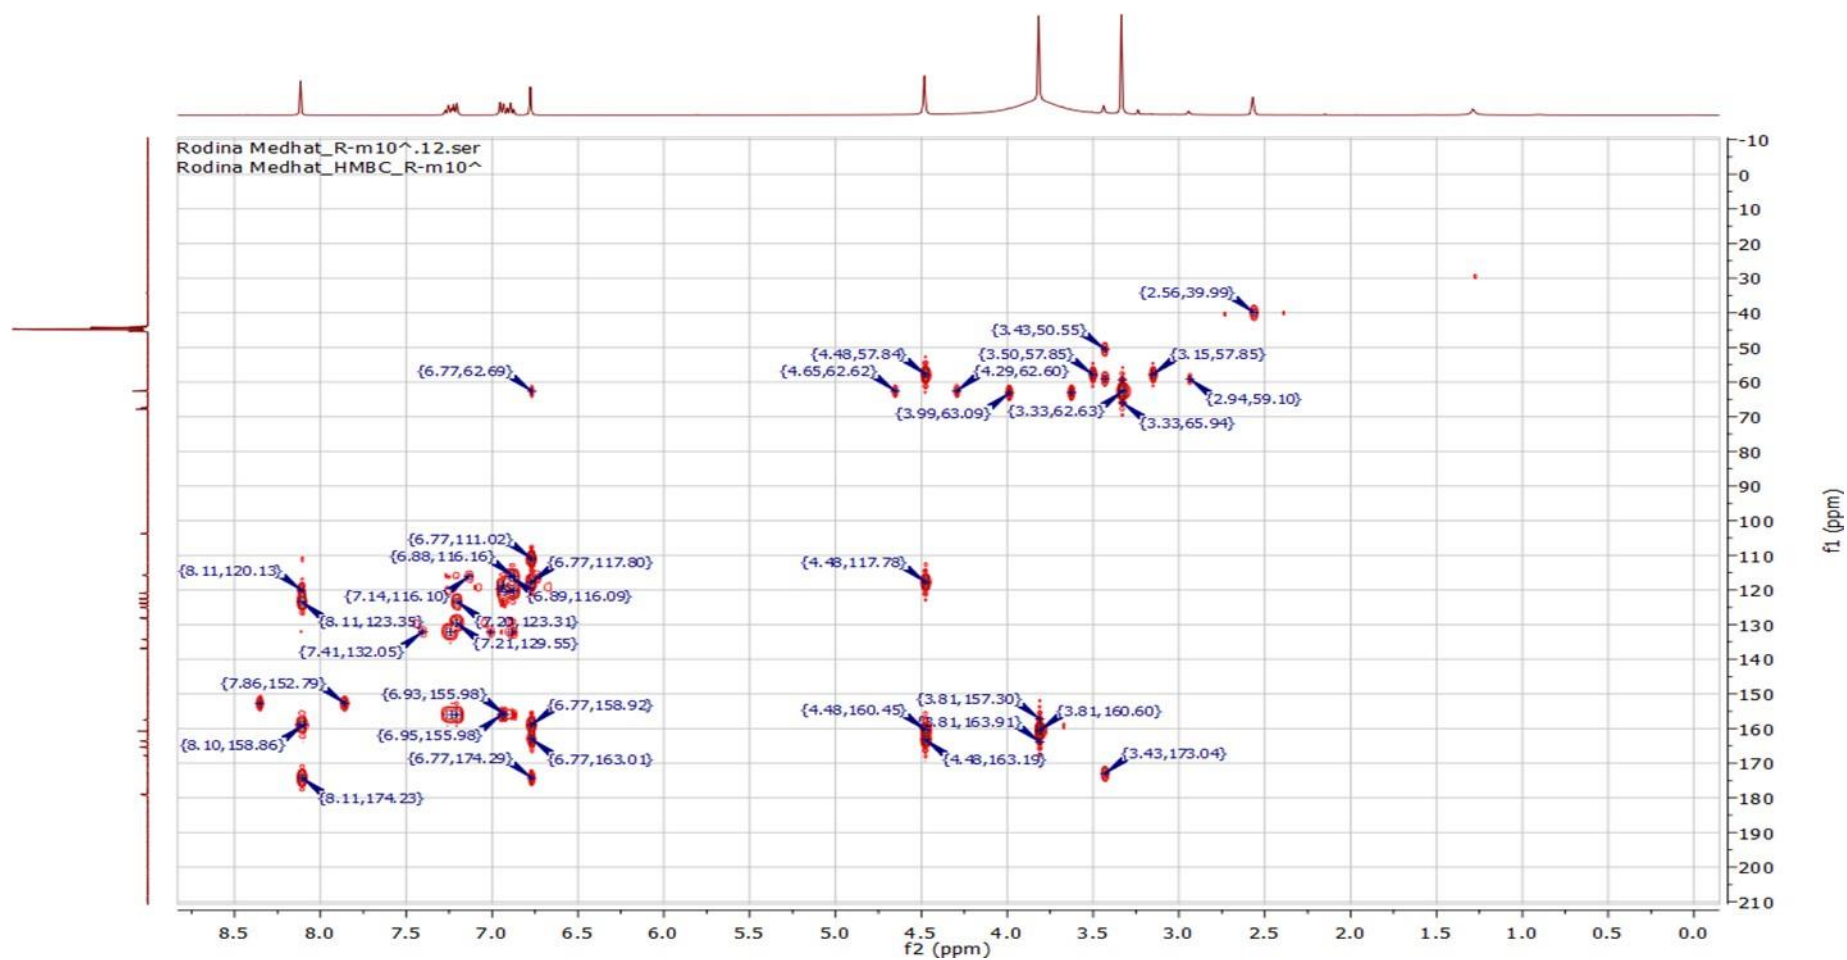

Figure. S 13 HMBC of compound 1



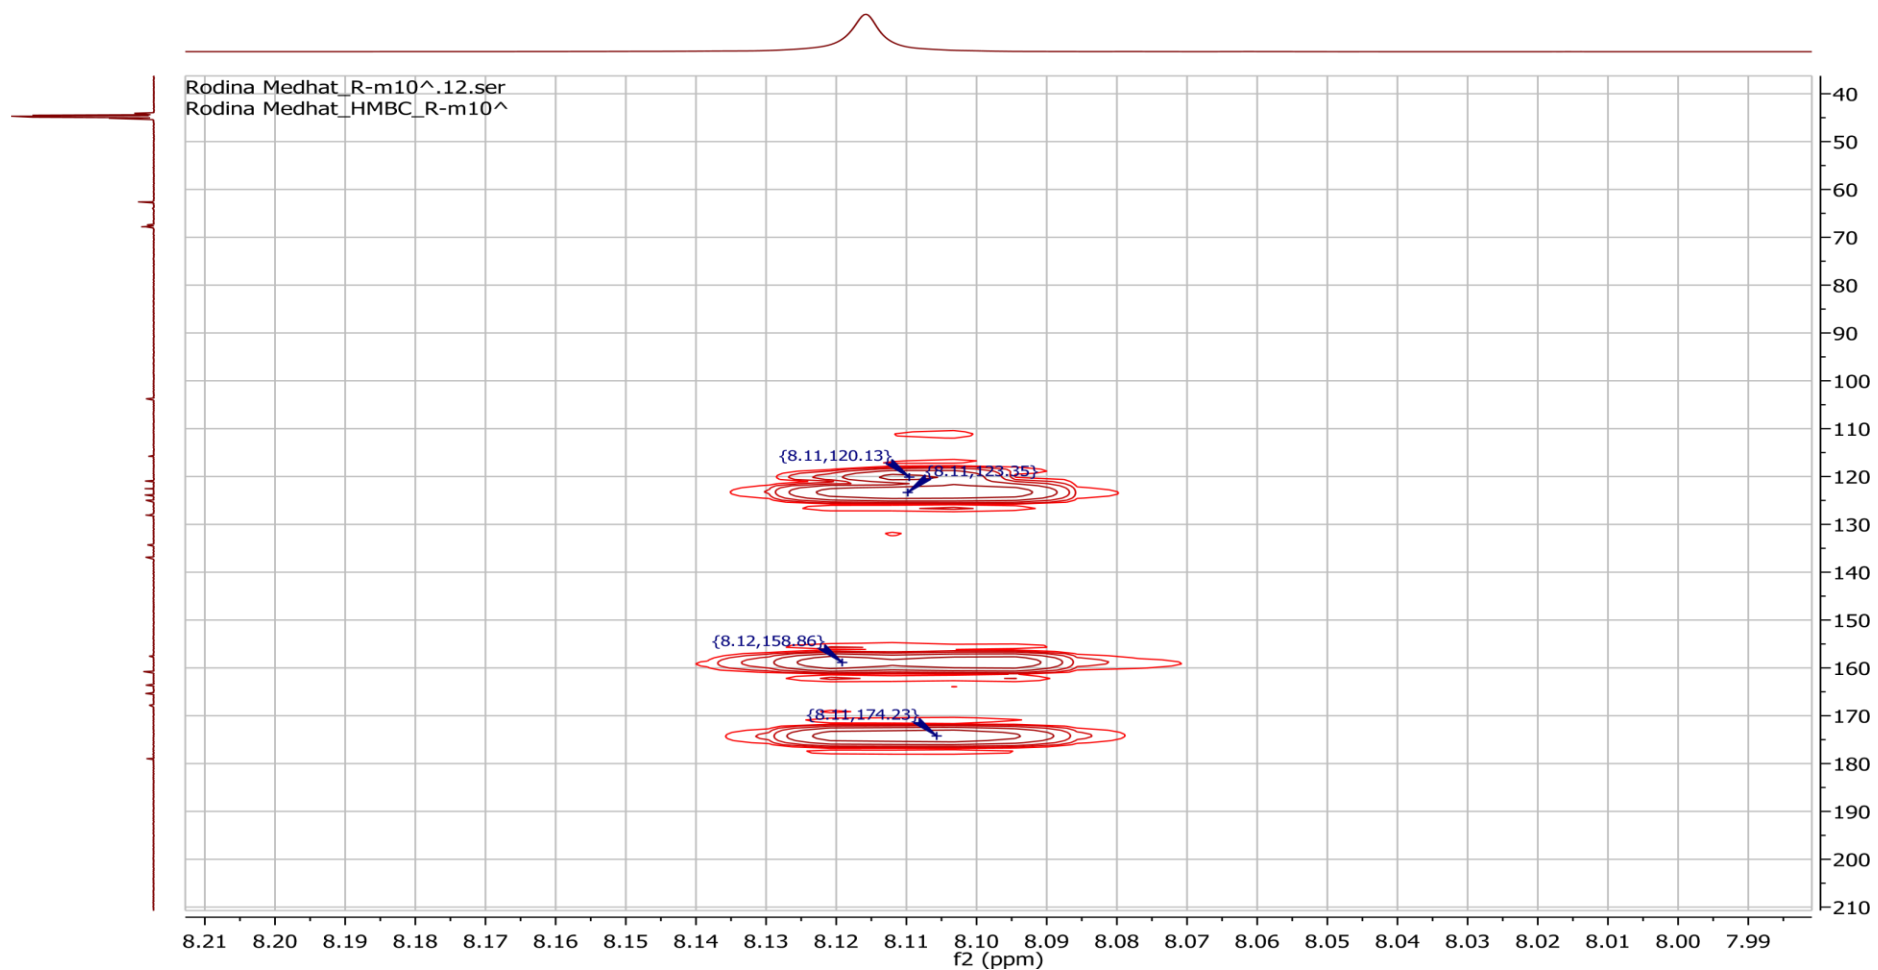

**Figure. S 14 Partial expansion of HMBC of compound 1**

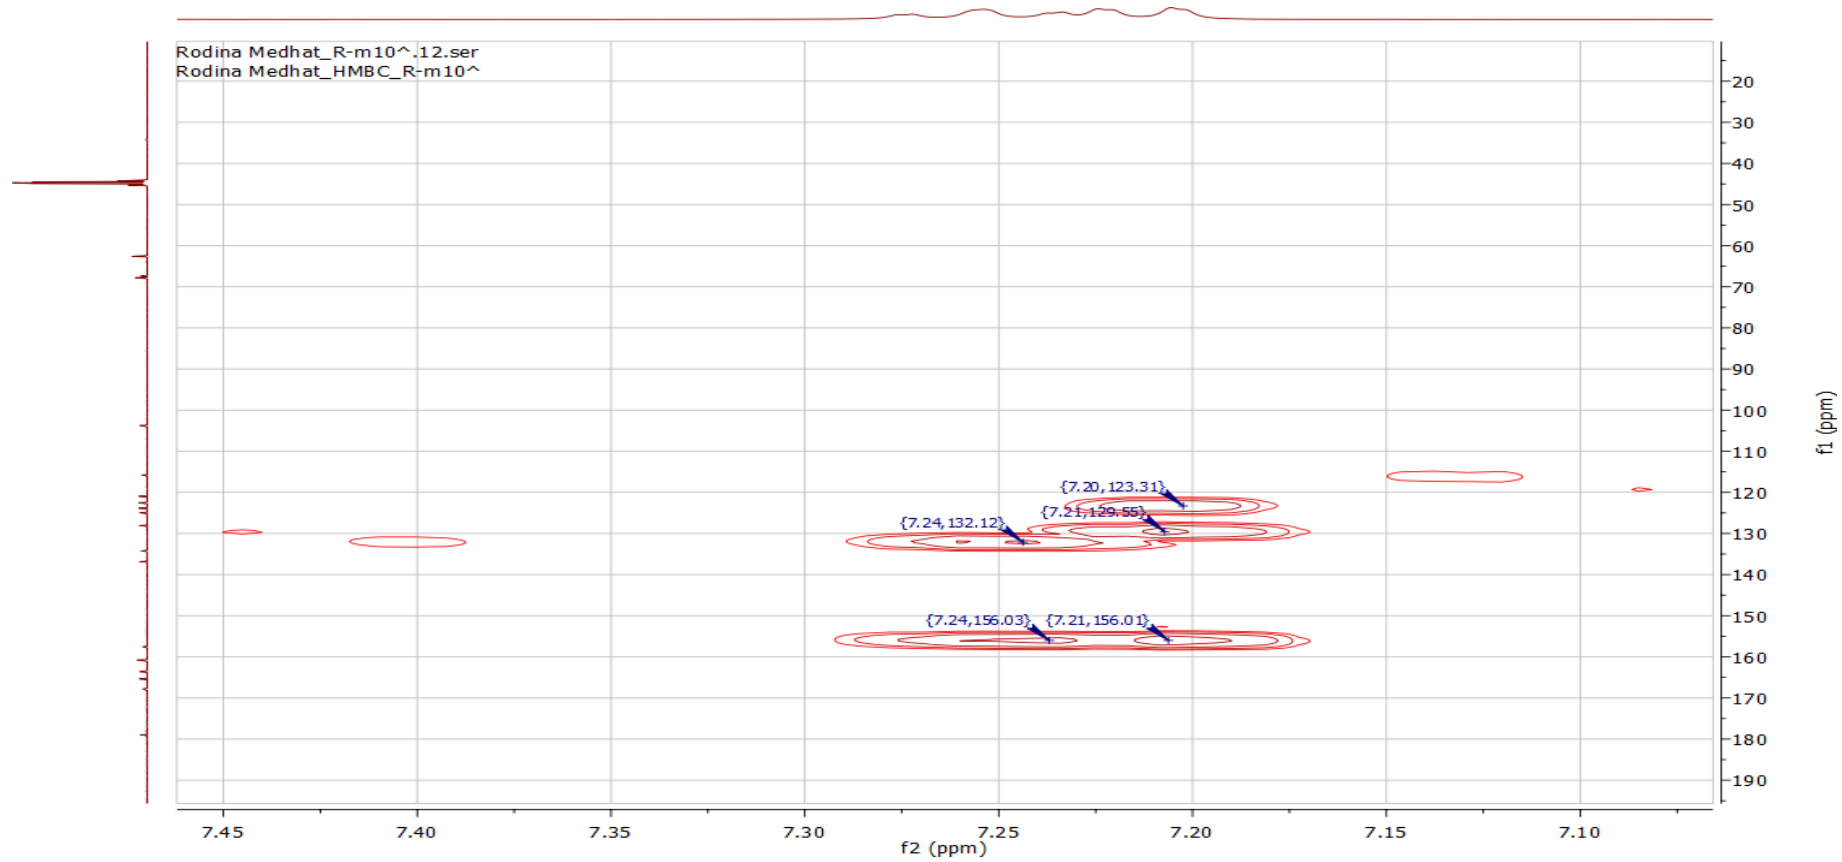

**Figure. S 15** Partial expansion of HMBC of compound 1

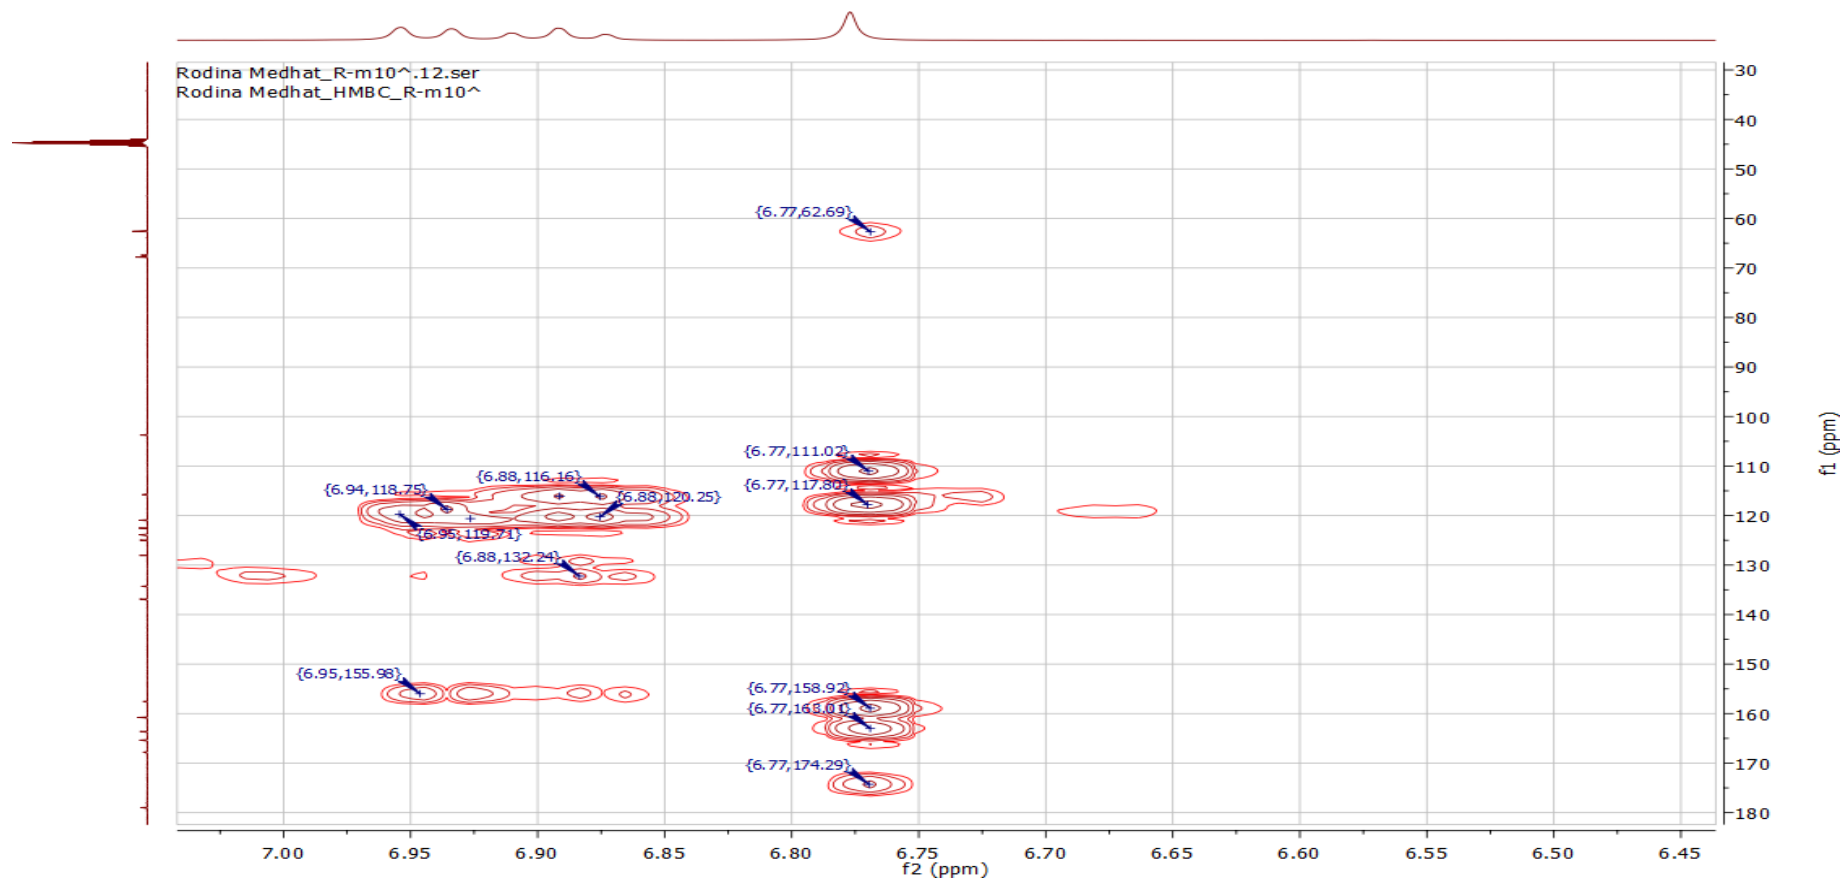

**Figure. S 16** Partial expansion of HMBC of compound 1

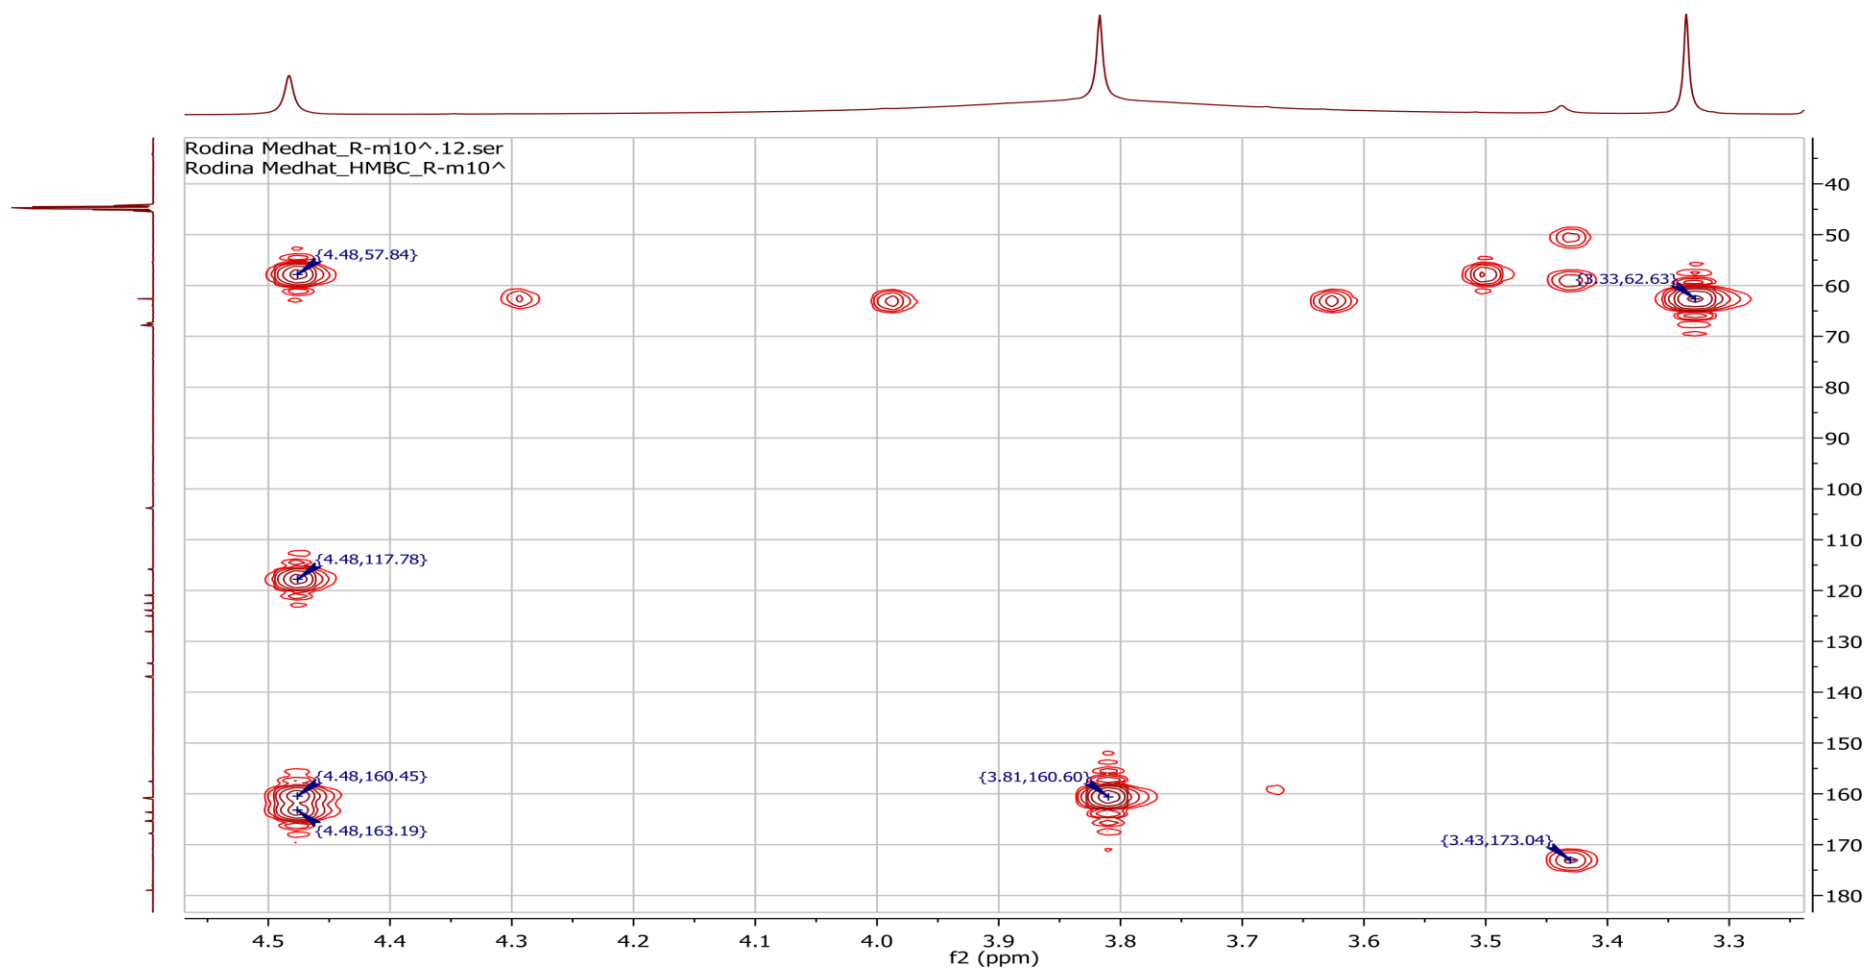

**Figure. S 17 Partial expansion of HMBC of compound 1**

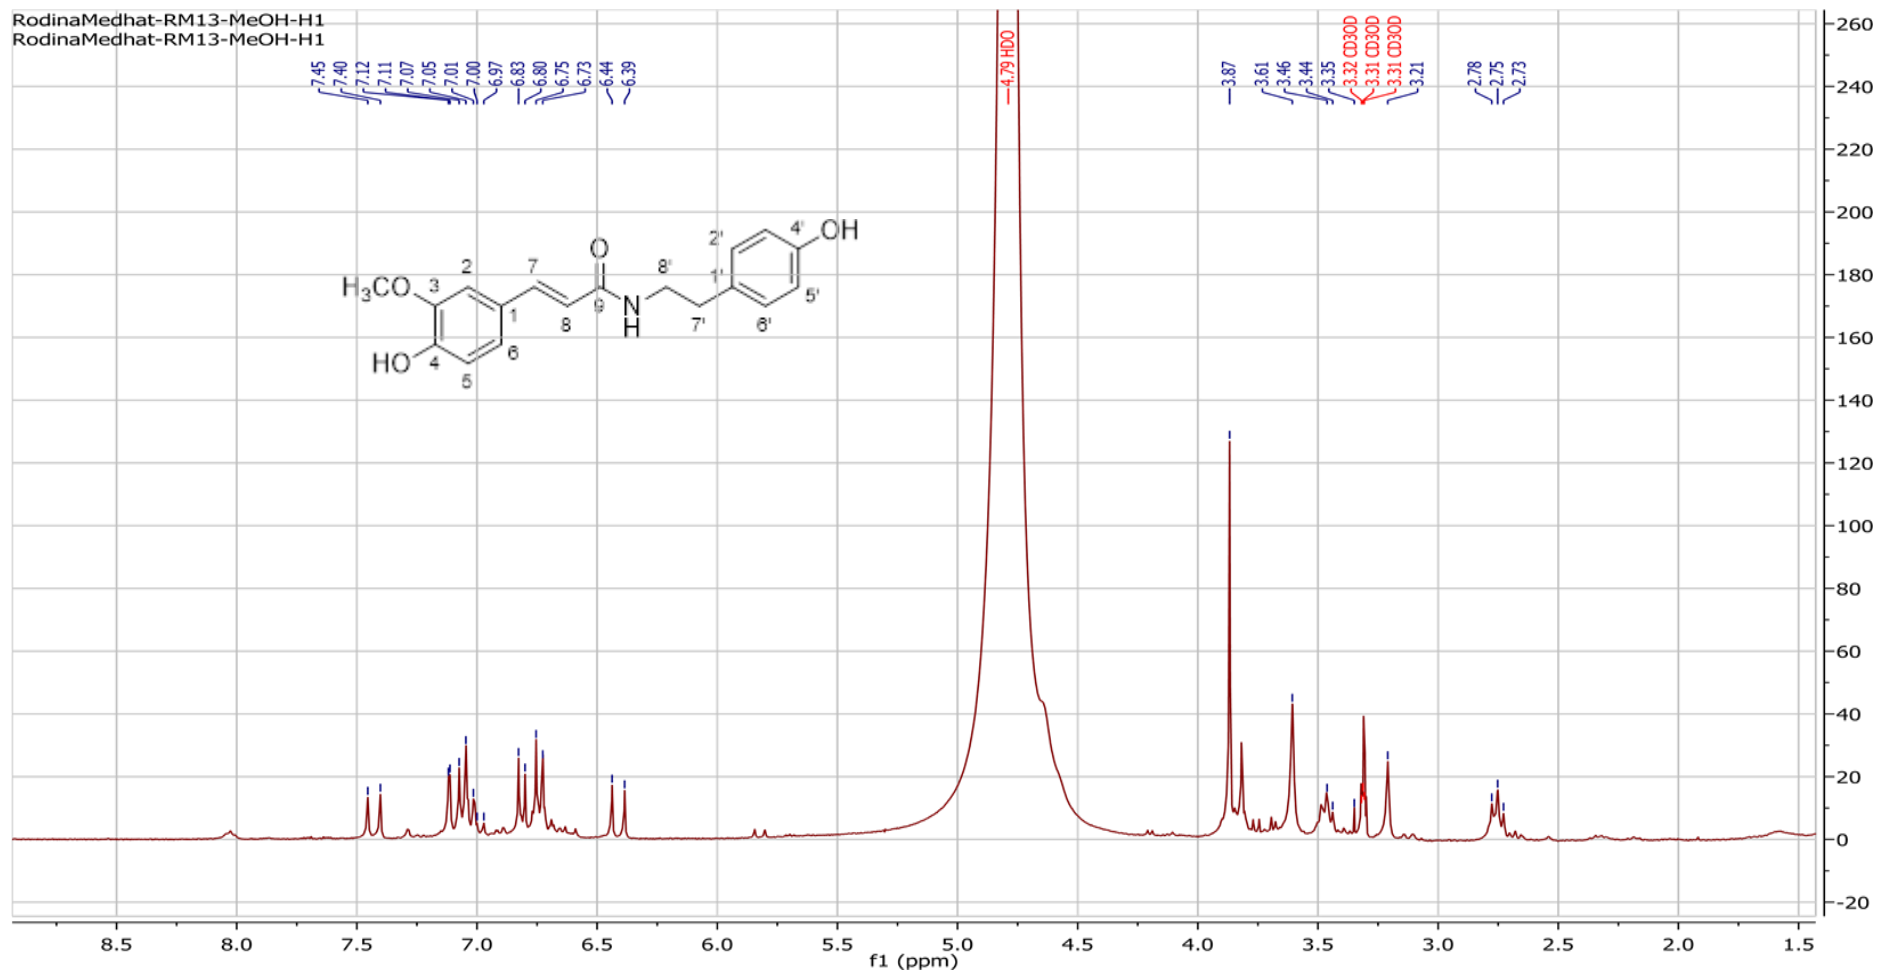

Figure. S 18 <sup>1</sup>H-NMR spectrum of compound 2 (600 MHz, CD<sub>3</sub>OD)

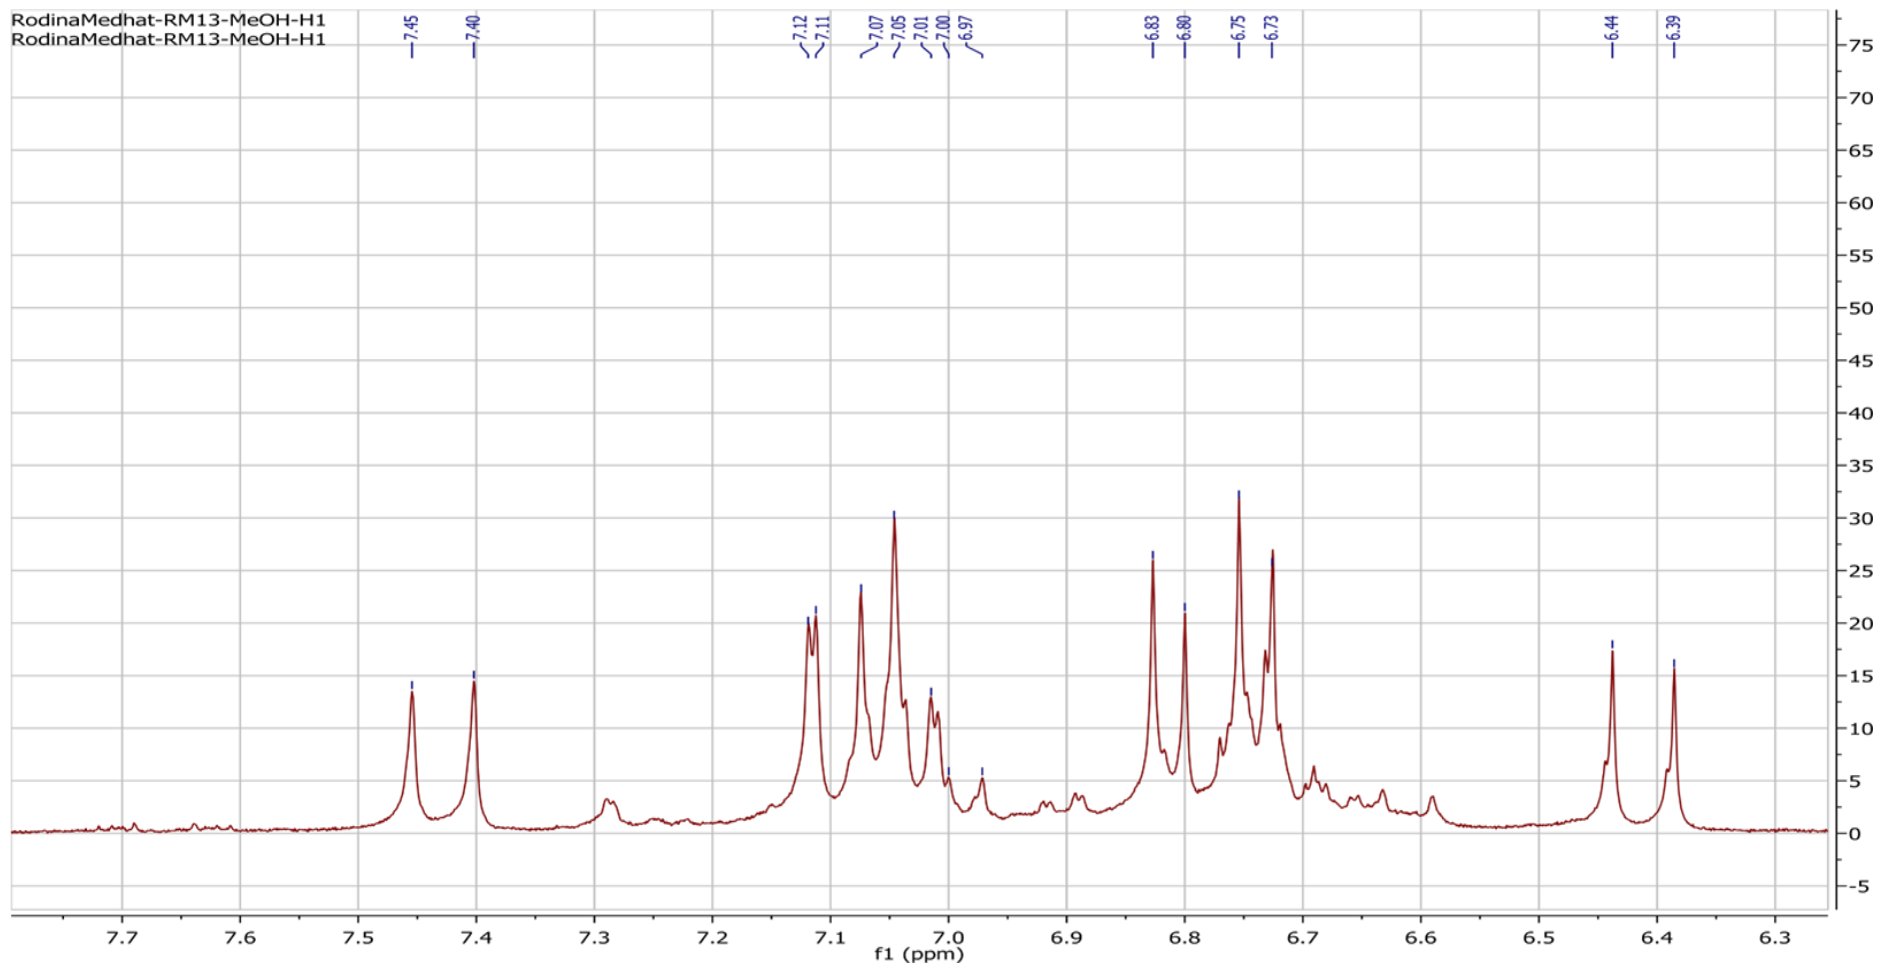

**Figure. S 19** Partial expansion of  $^1\text{H}$ -NMR spectrum of compound **2** (600 MHz,  $\text{CD}_3\text{OD}$ )

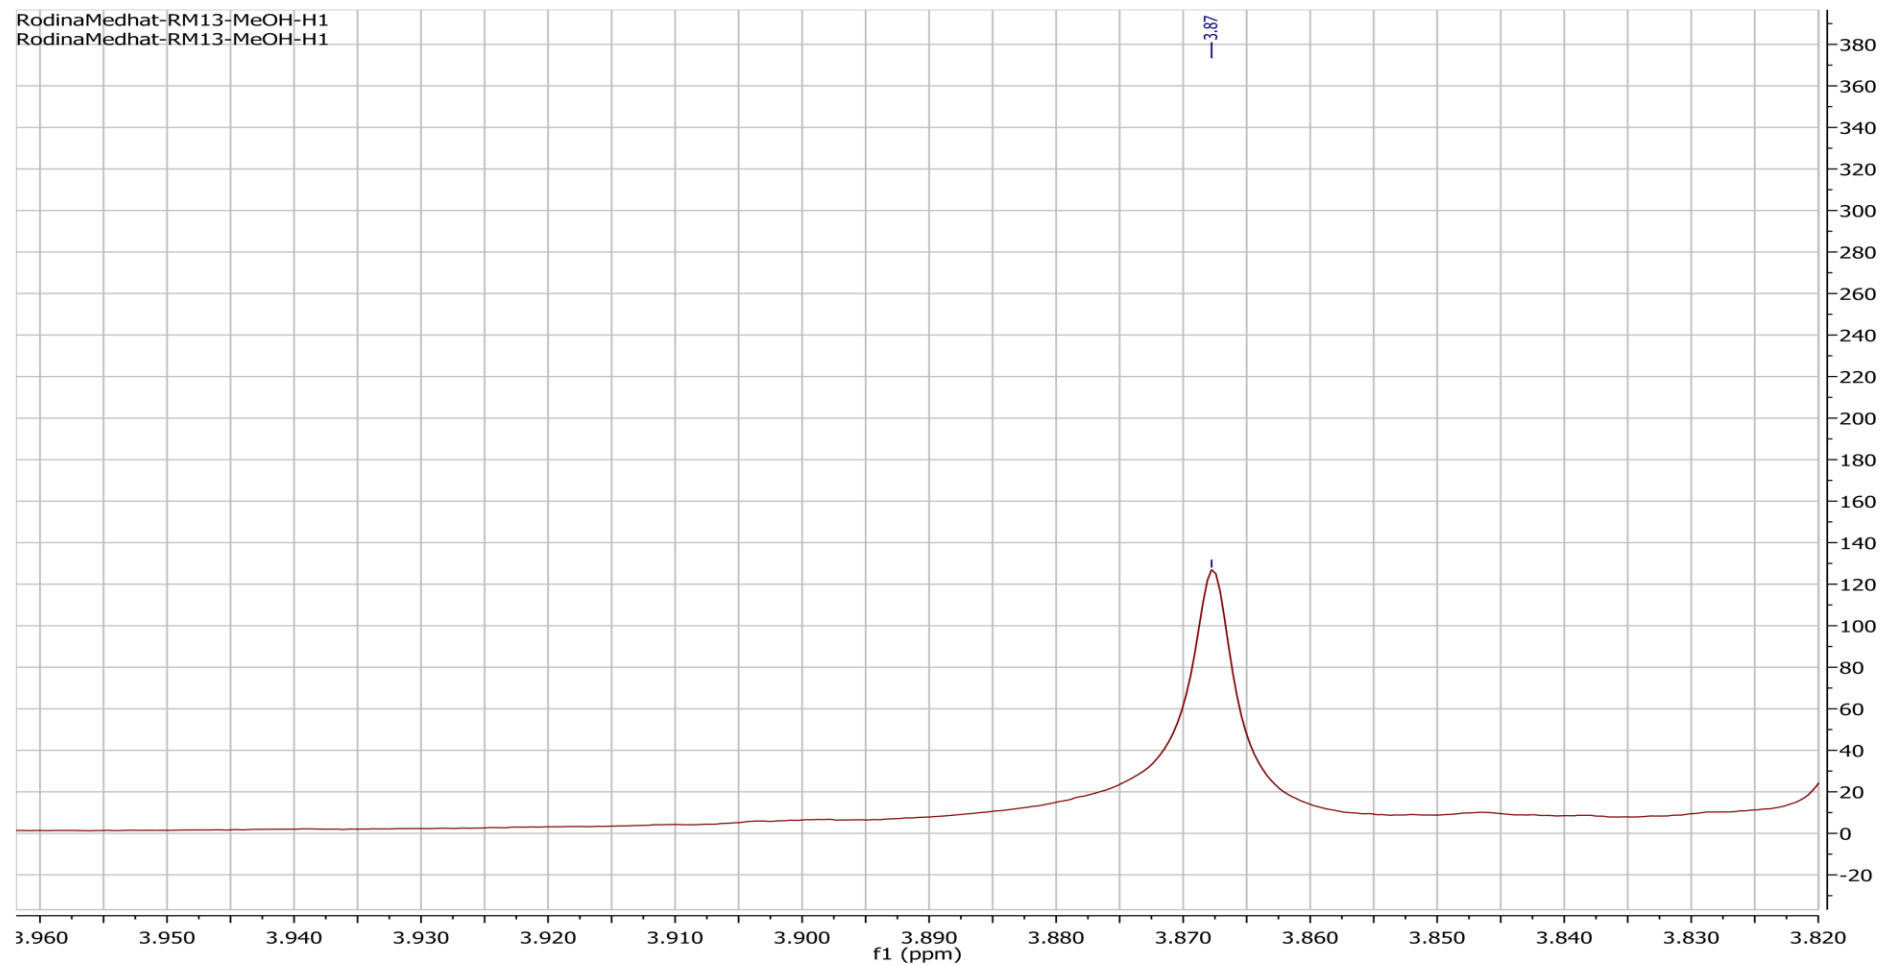

**Figure. S 20 Partial expansion of  $^1\text{H-NMR}$  spectrum of compound 2 (600 MHz,  $\text{CD}_3\text{OD}$ )**

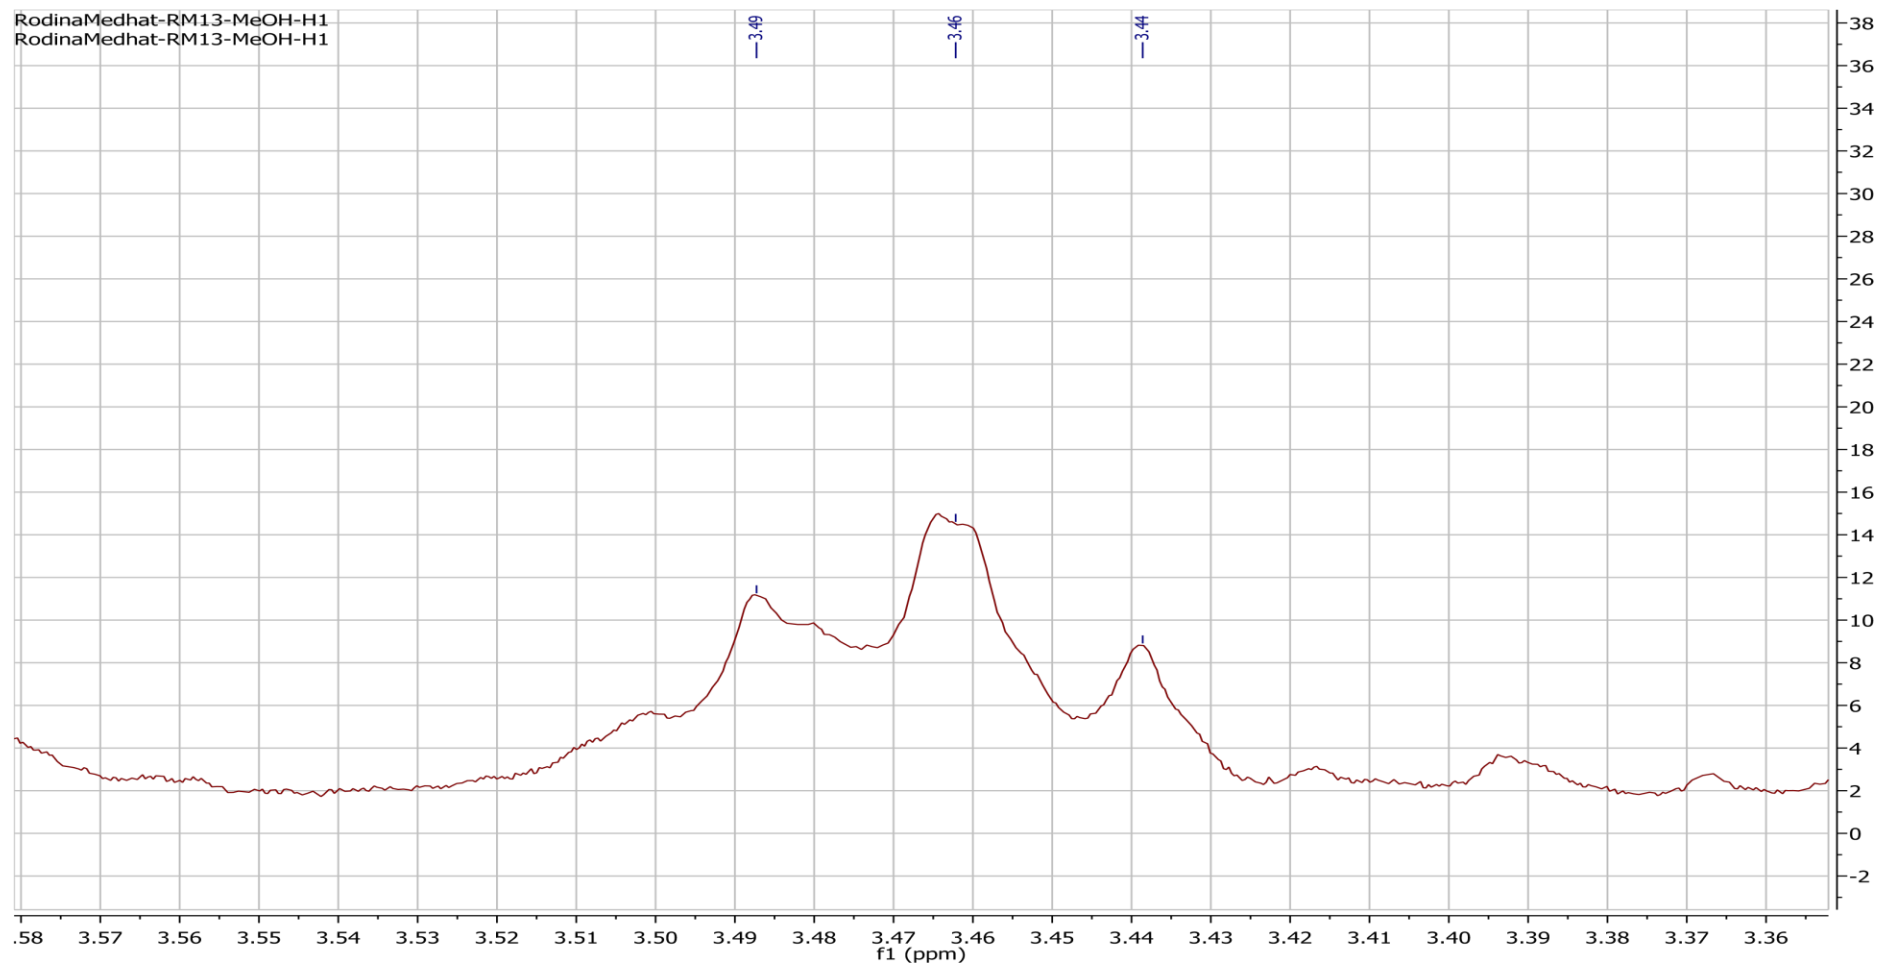

**Figure. S 21** Partial expansion of  $^1\text{H-NMR}$  spectrum of compound 2 (600 MHz,  $\text{CD}_3\text{OD}$ )



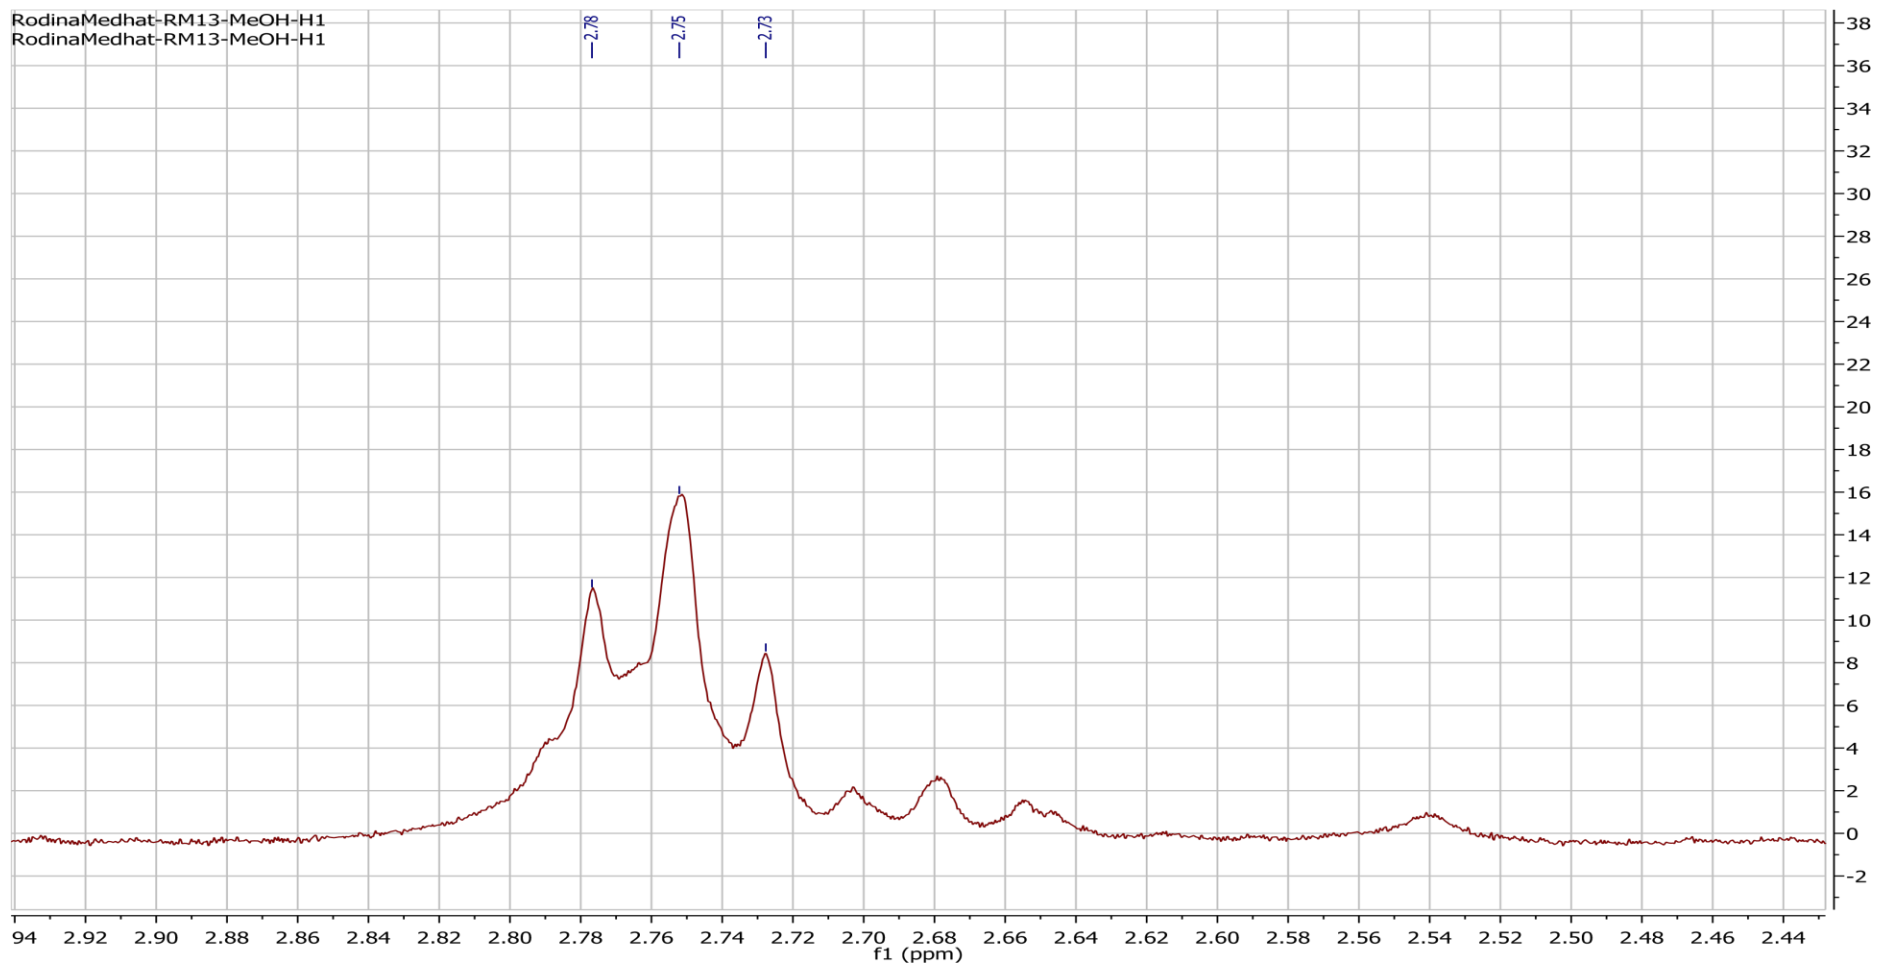

**Figure. S 22** Partial expansion of  $^1\text{H-NMR}$  spectrum of compound 2 (600 MHz,  $\text{CD}_3\text{OD}$ )

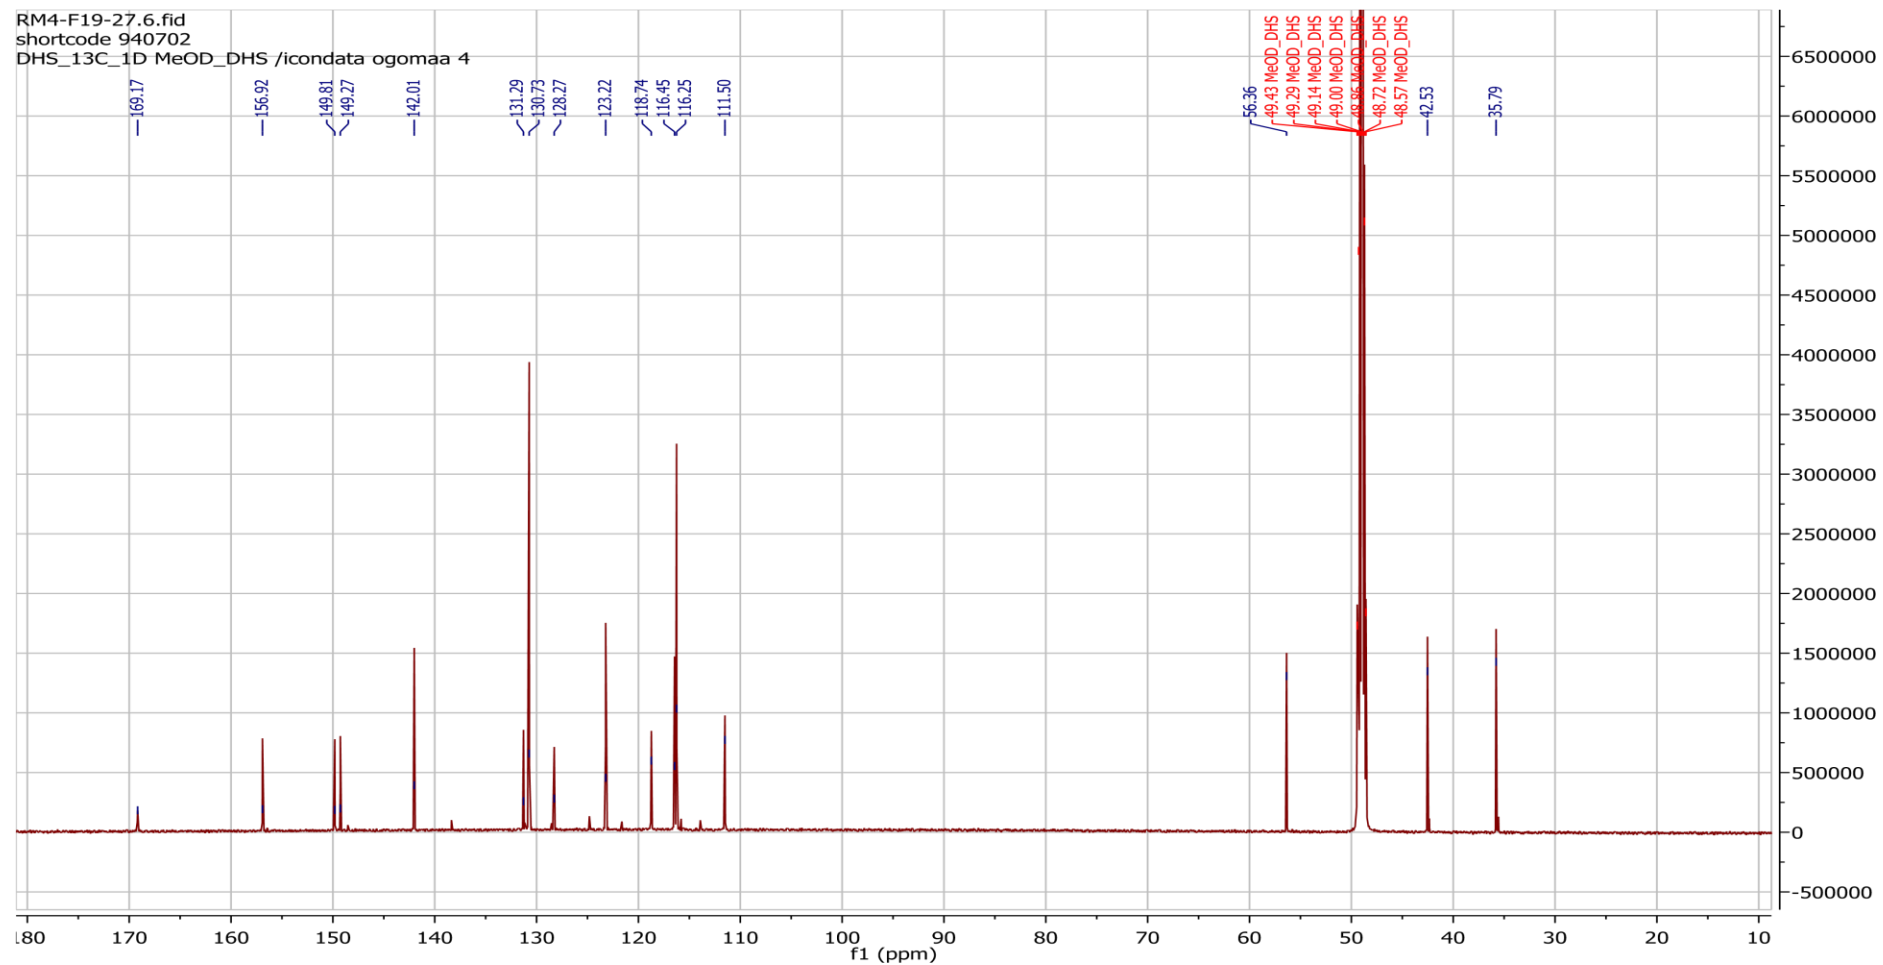

Figure. S 23  $^{13}\text{C}$ -NMR spectrum of compound 2 (600 MHz,  $\text{CD}_3\text{OD}$ )

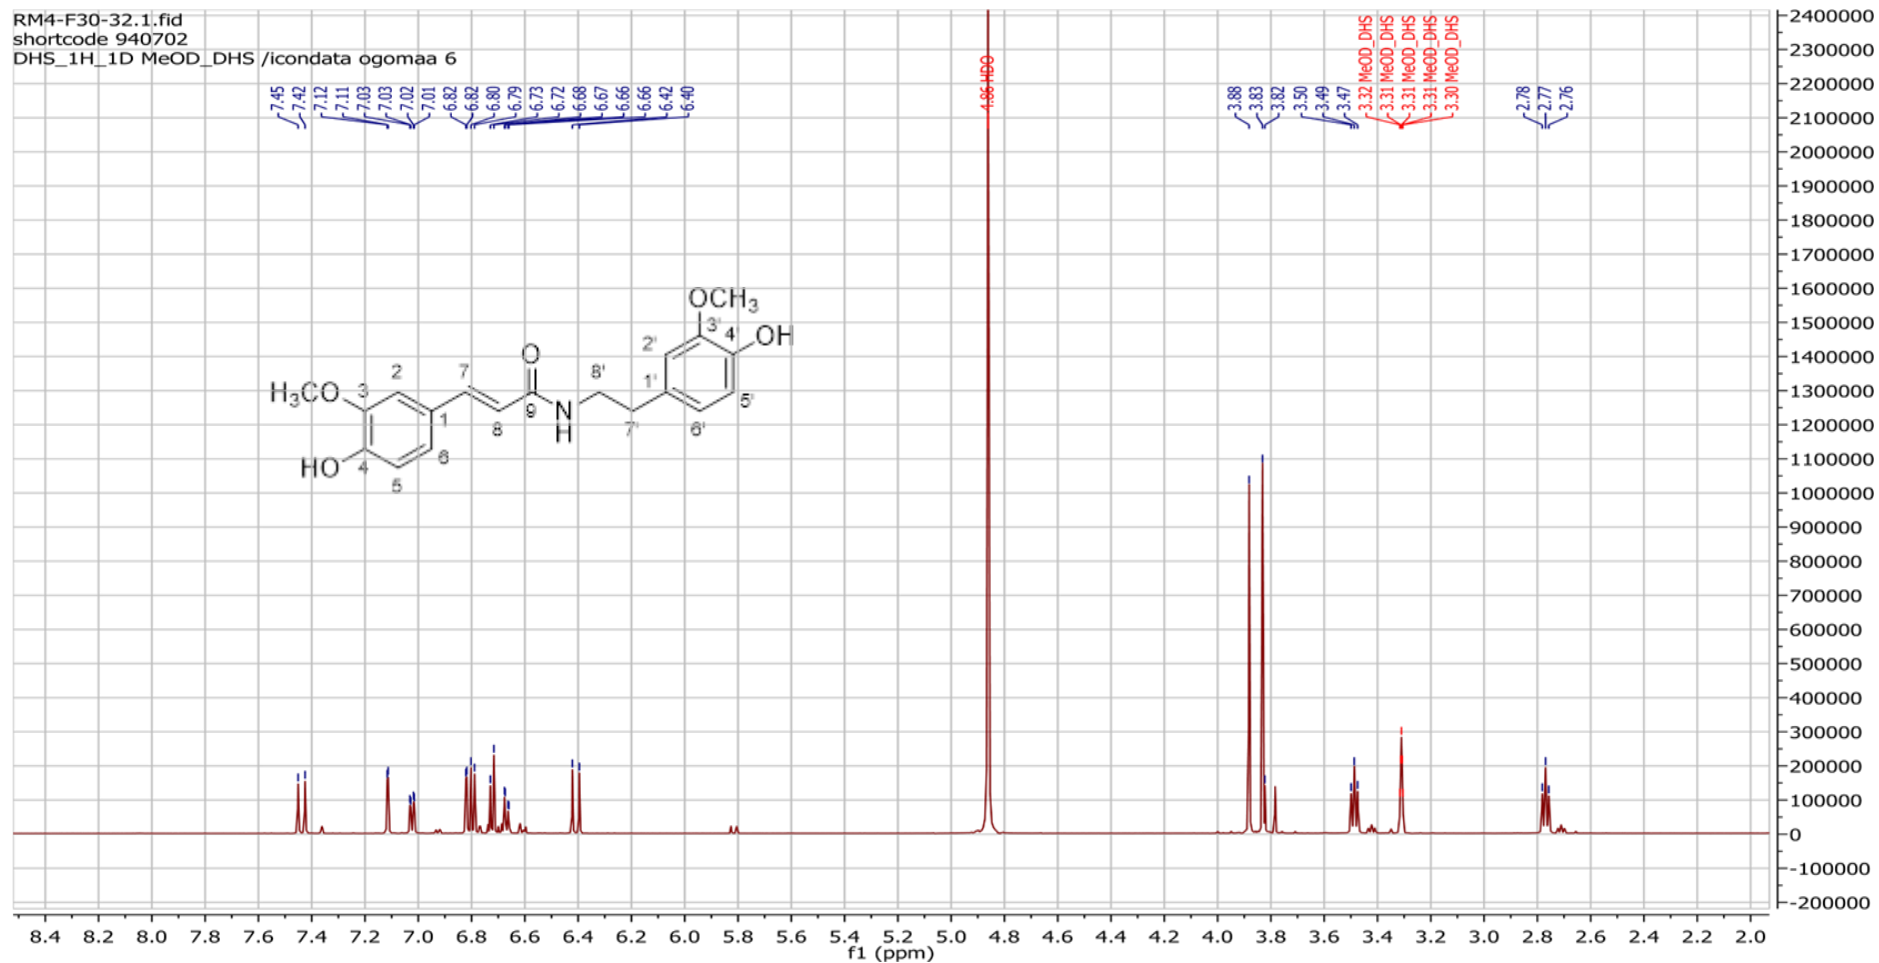

Figure. S 24  $^1\text{H-NMR}$  spectrum of compound 3 (600 MHz,  $\text{CD}_3\text{OD}$ )

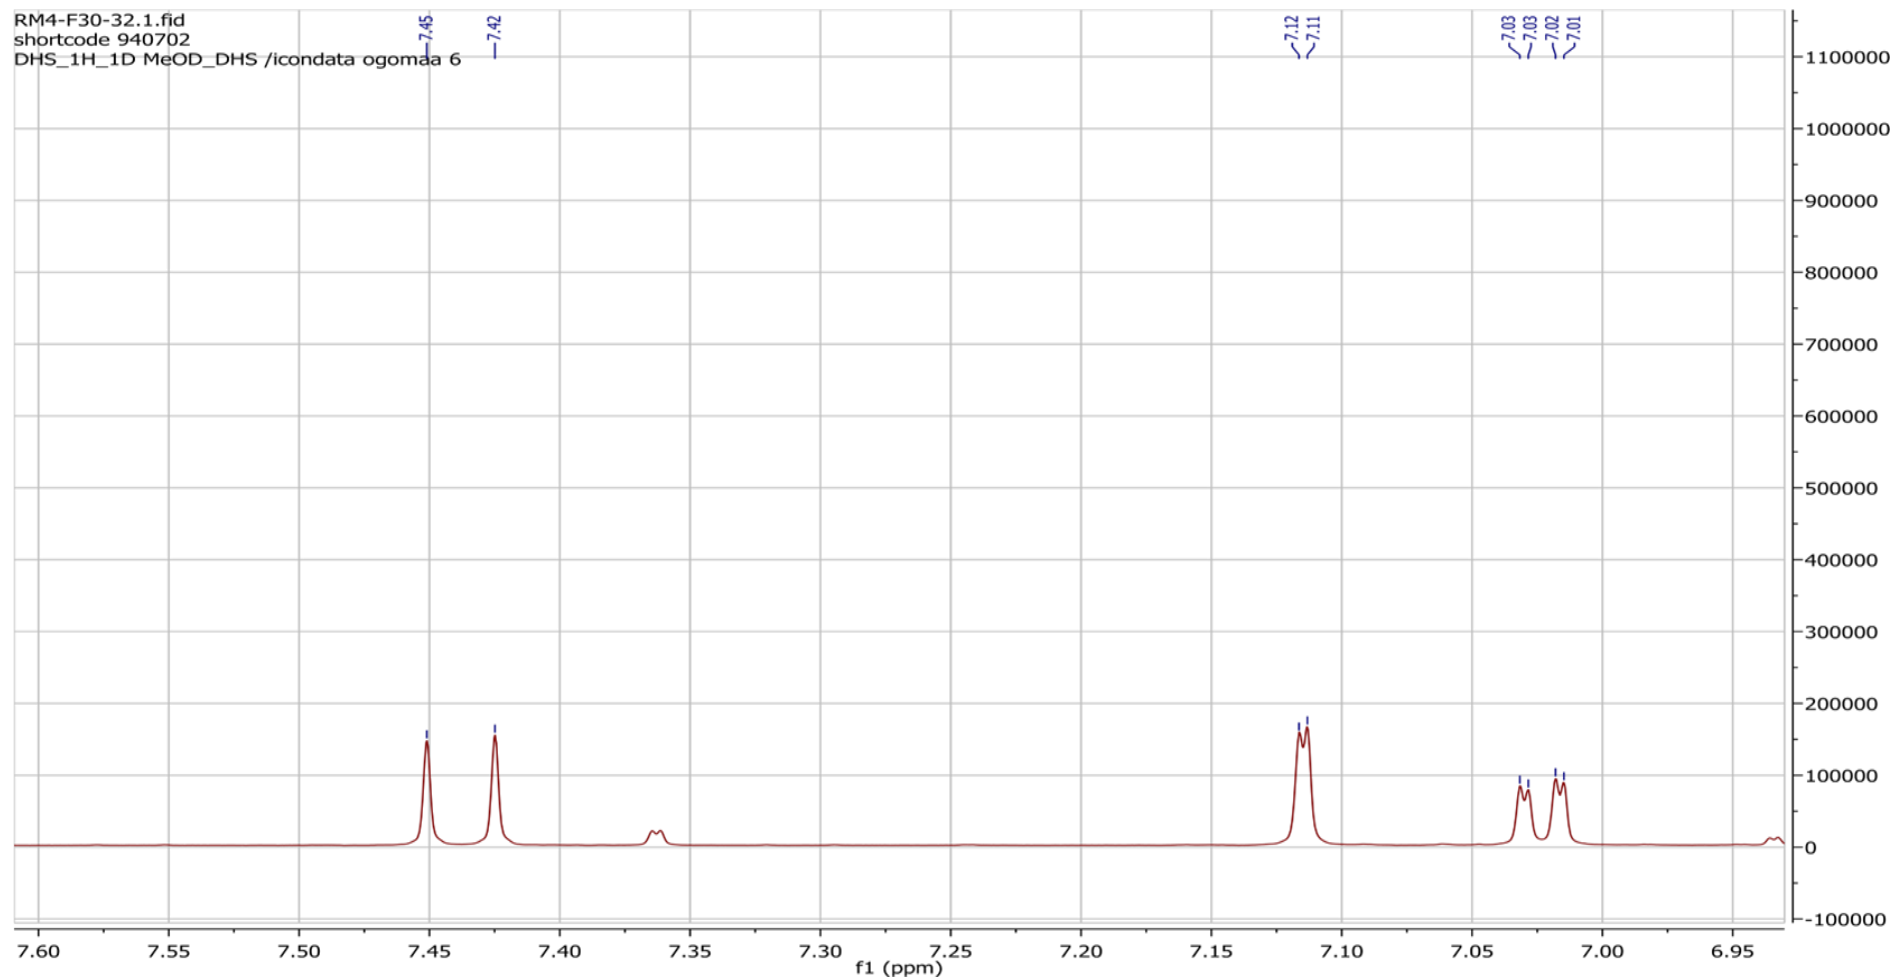

**Figure. S 25** Partial expansion of  $^1\text{H}$ -NMR spectrum of compound 3 (600 MHz,  $\text{CD}_3\text{OD}$ )

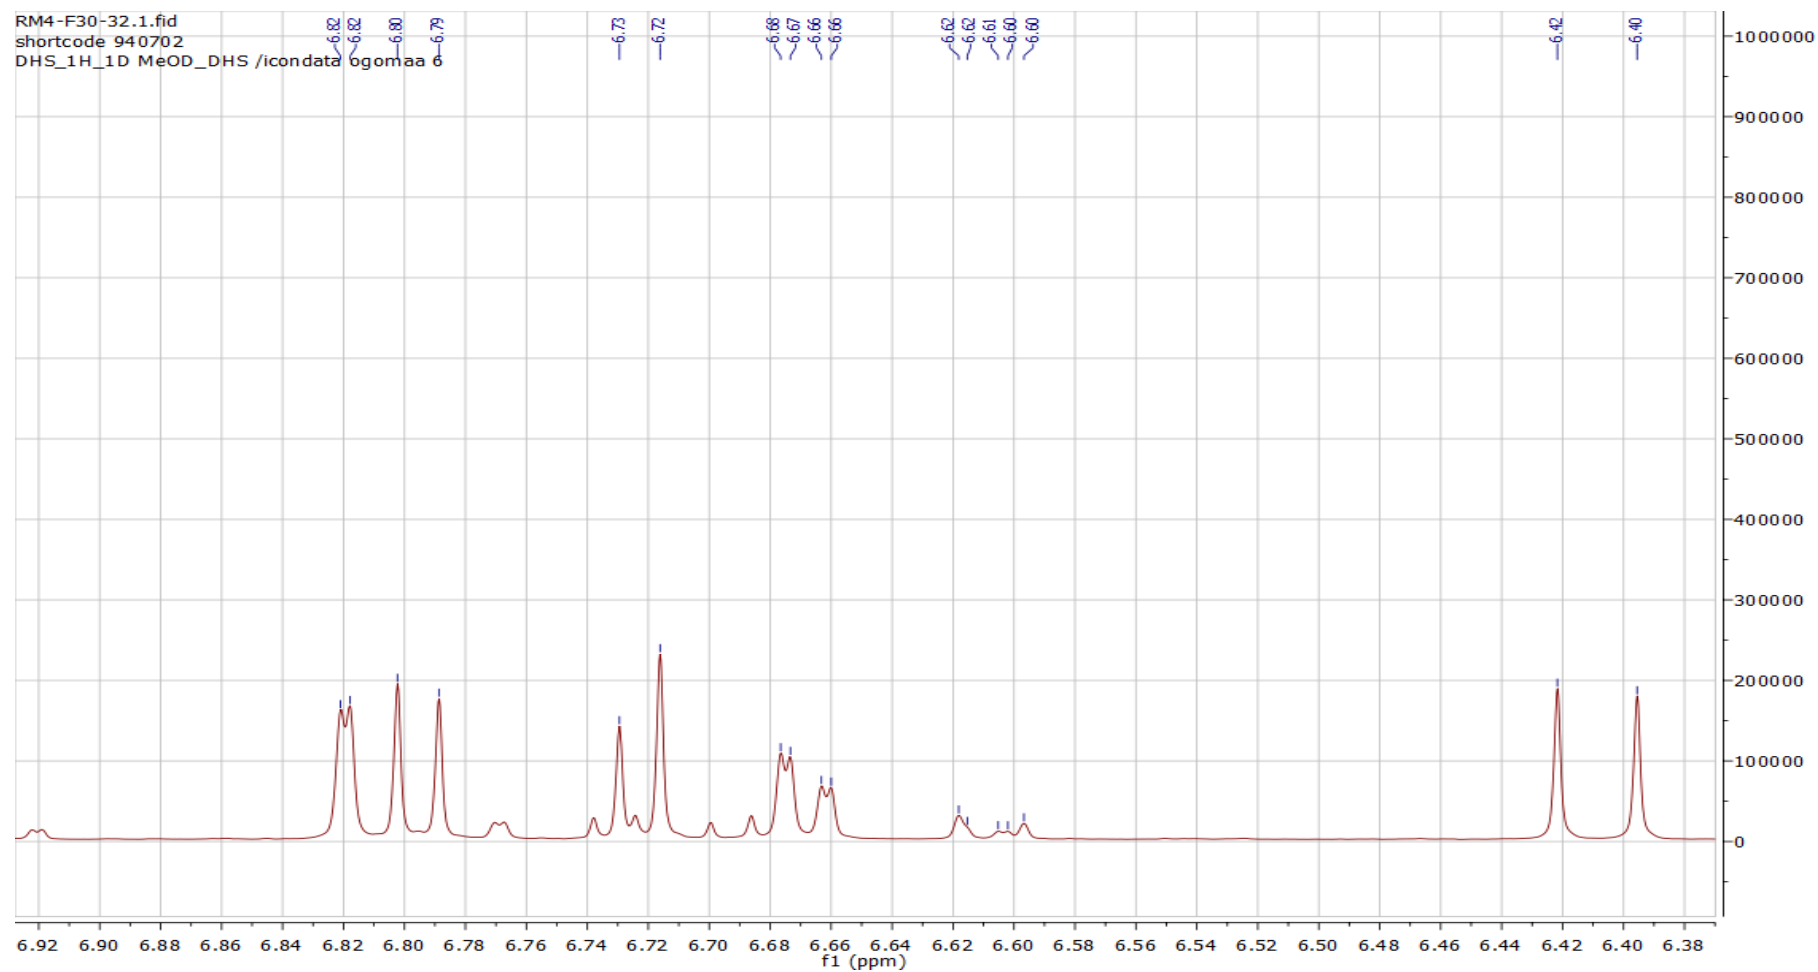

**Figure. S 26** Partial expansion of <sup>1</sup>H-NMR spectrum of compound 3 (600 MHz, CD<sub>3</sub>OD)

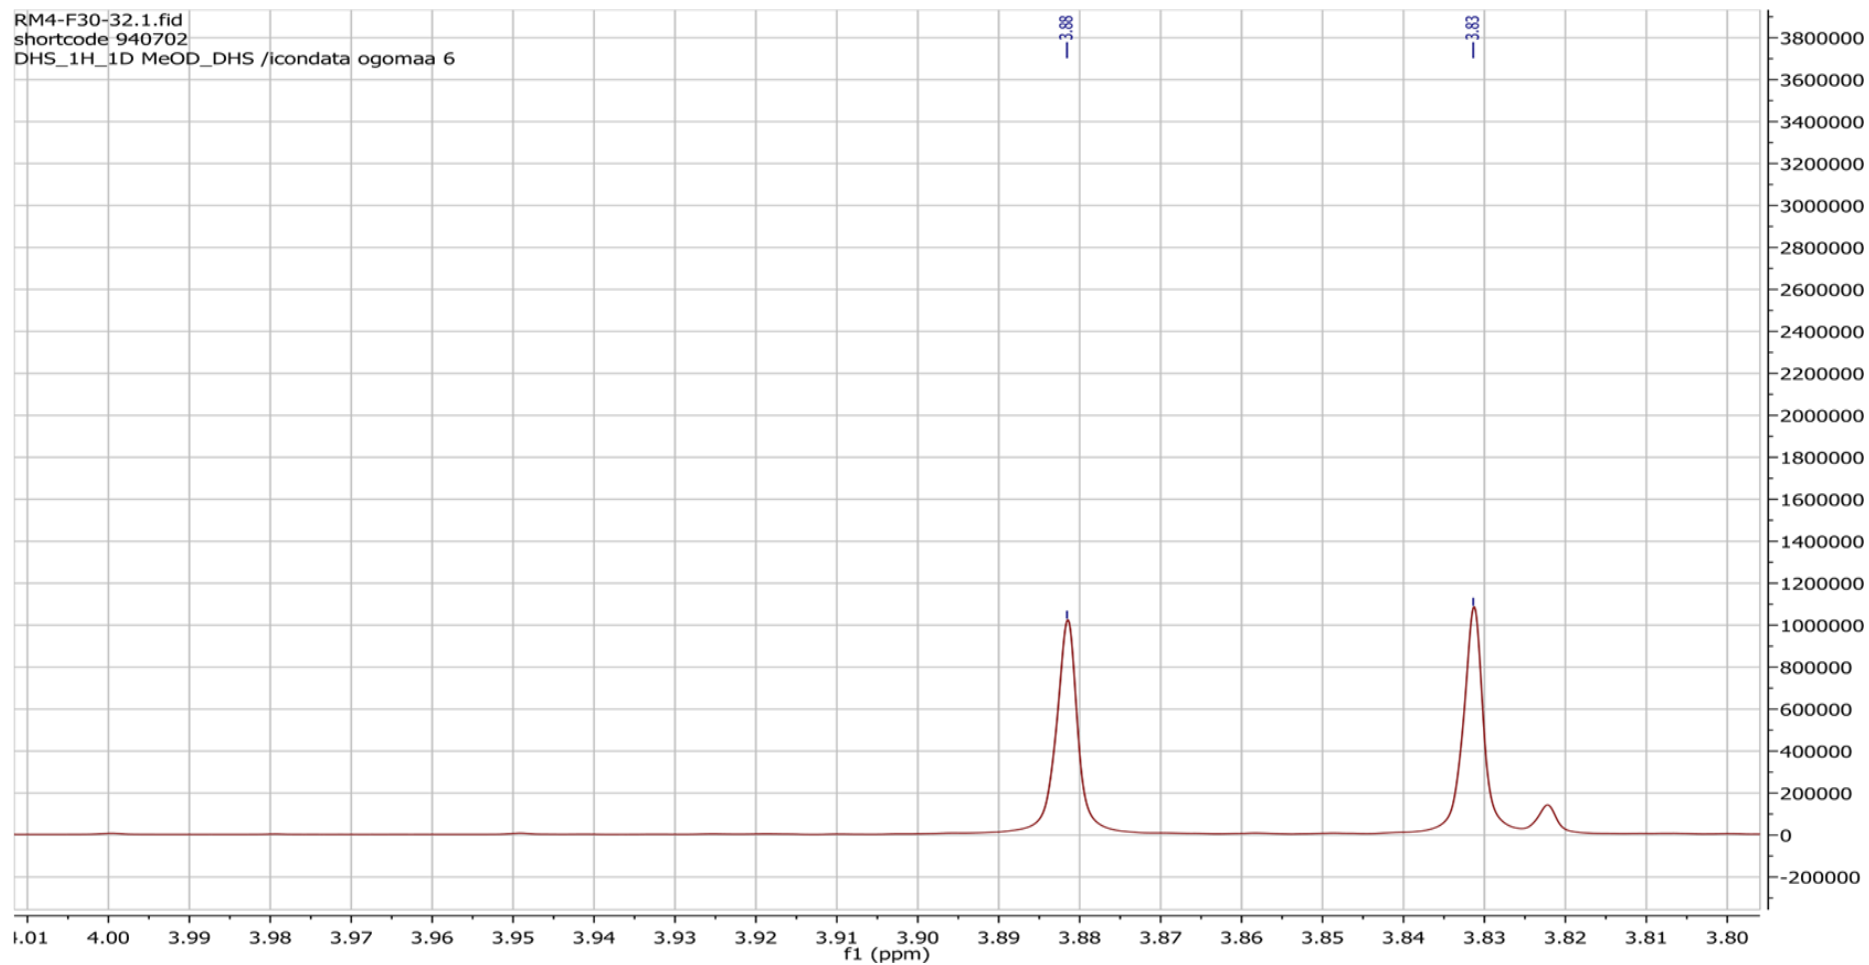

**Figure. S 27** Partial expansion of  $^1\text{H}$ -NMR spectrum of compound 3 (600 MHz,  $\text{CD}_3\text{OD}$ )

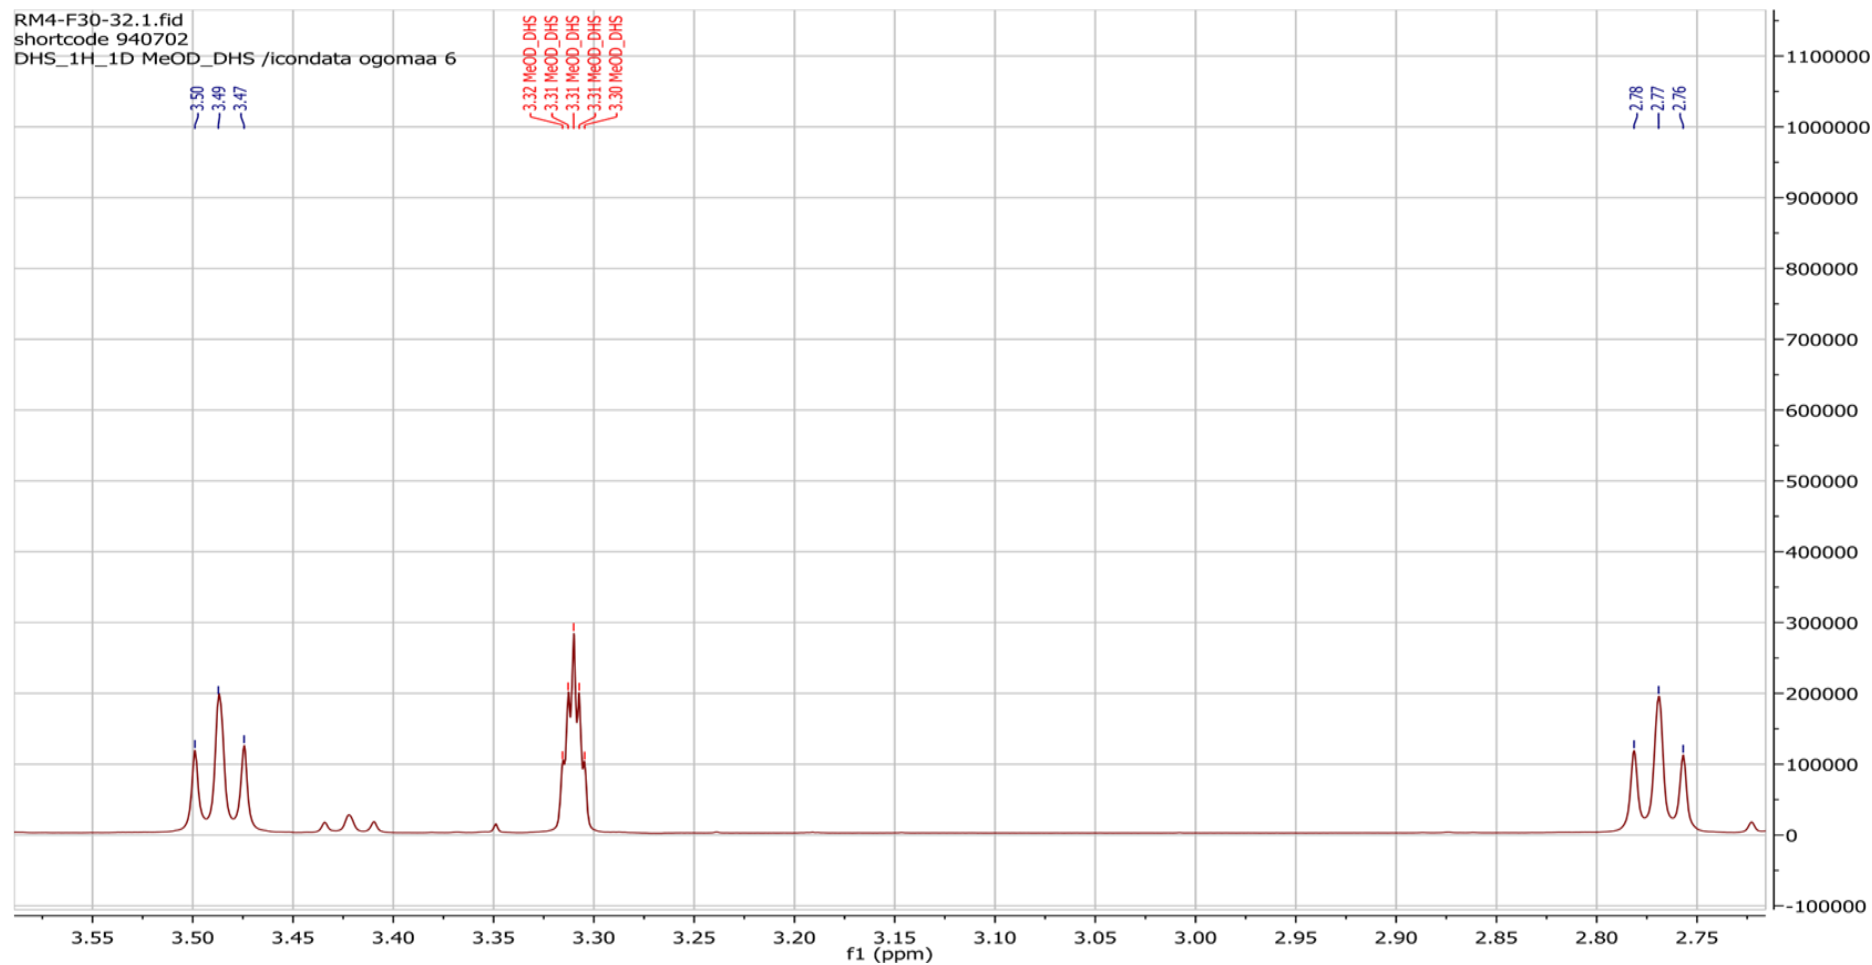

**Figure. S 28** Partial expansion of  $^1\text{H}$ -NMR spectrum of compound 3 (600 MHz,  $\text{CD}_3\text{OD}$ )

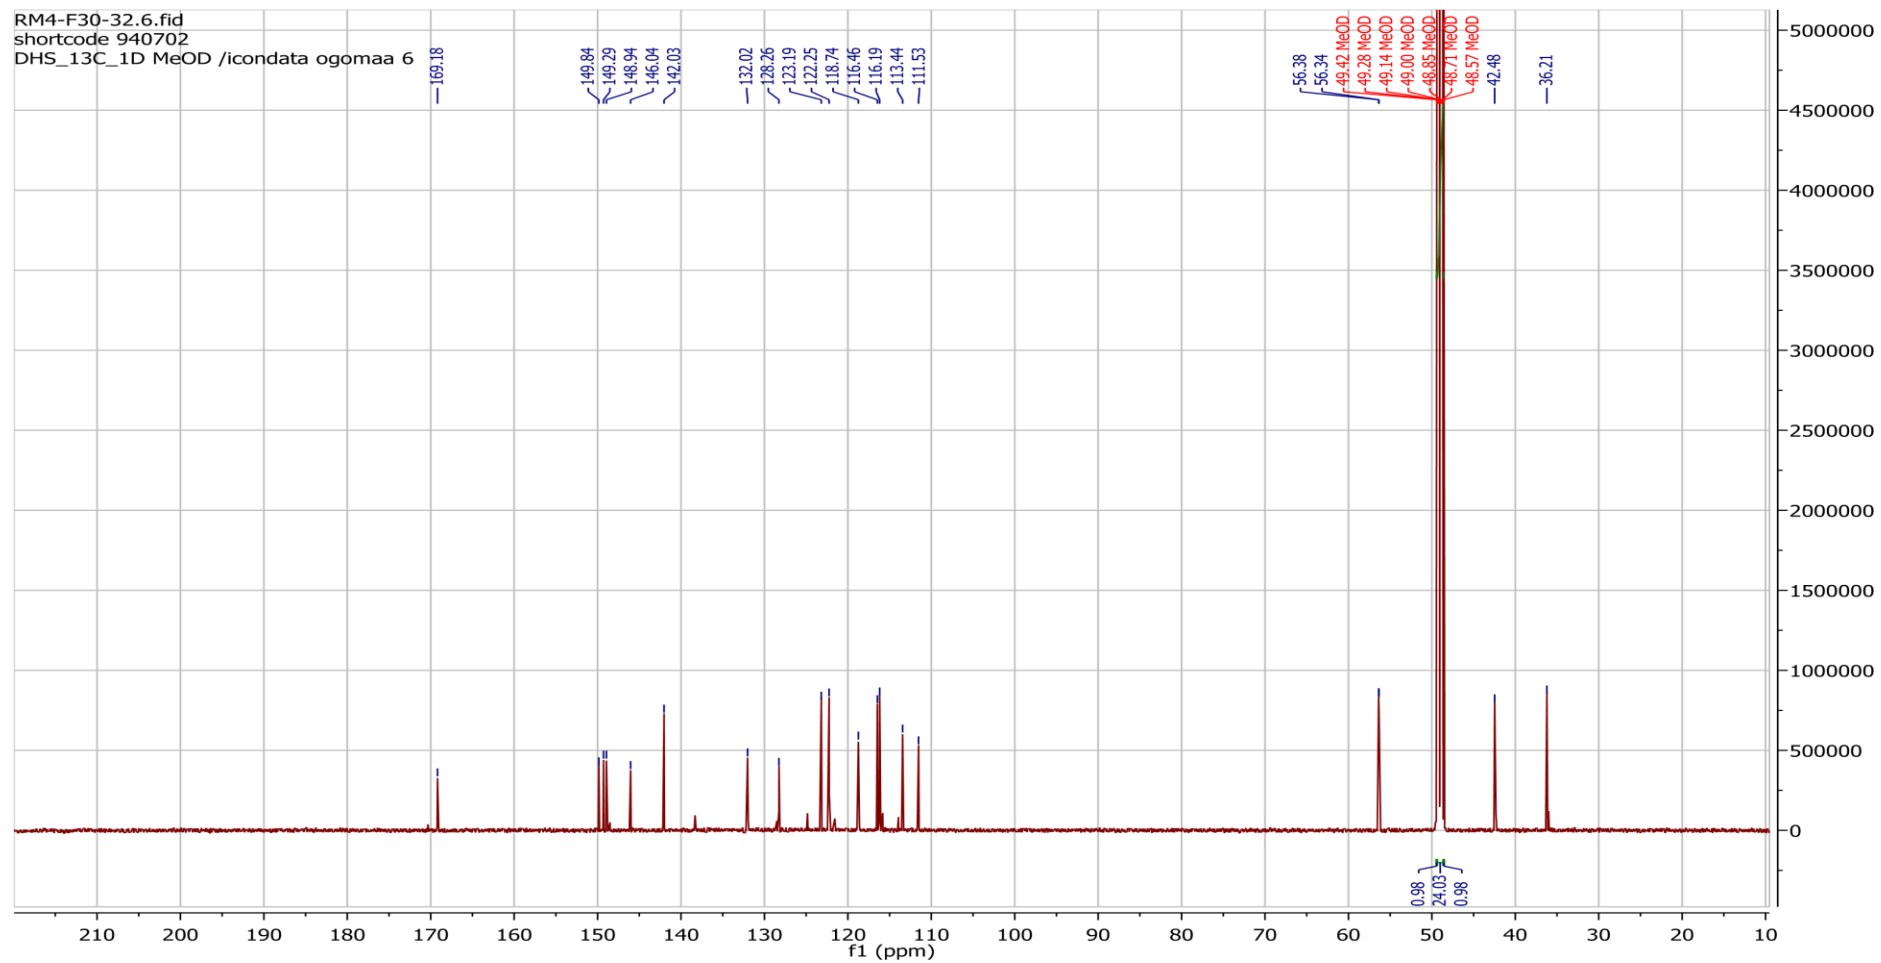

Figure. S 29  $^{13}\text{C}$ -NMR spectrum of compound 3 (150 MHz,  $\text{CD}_3\text{OD}$ )



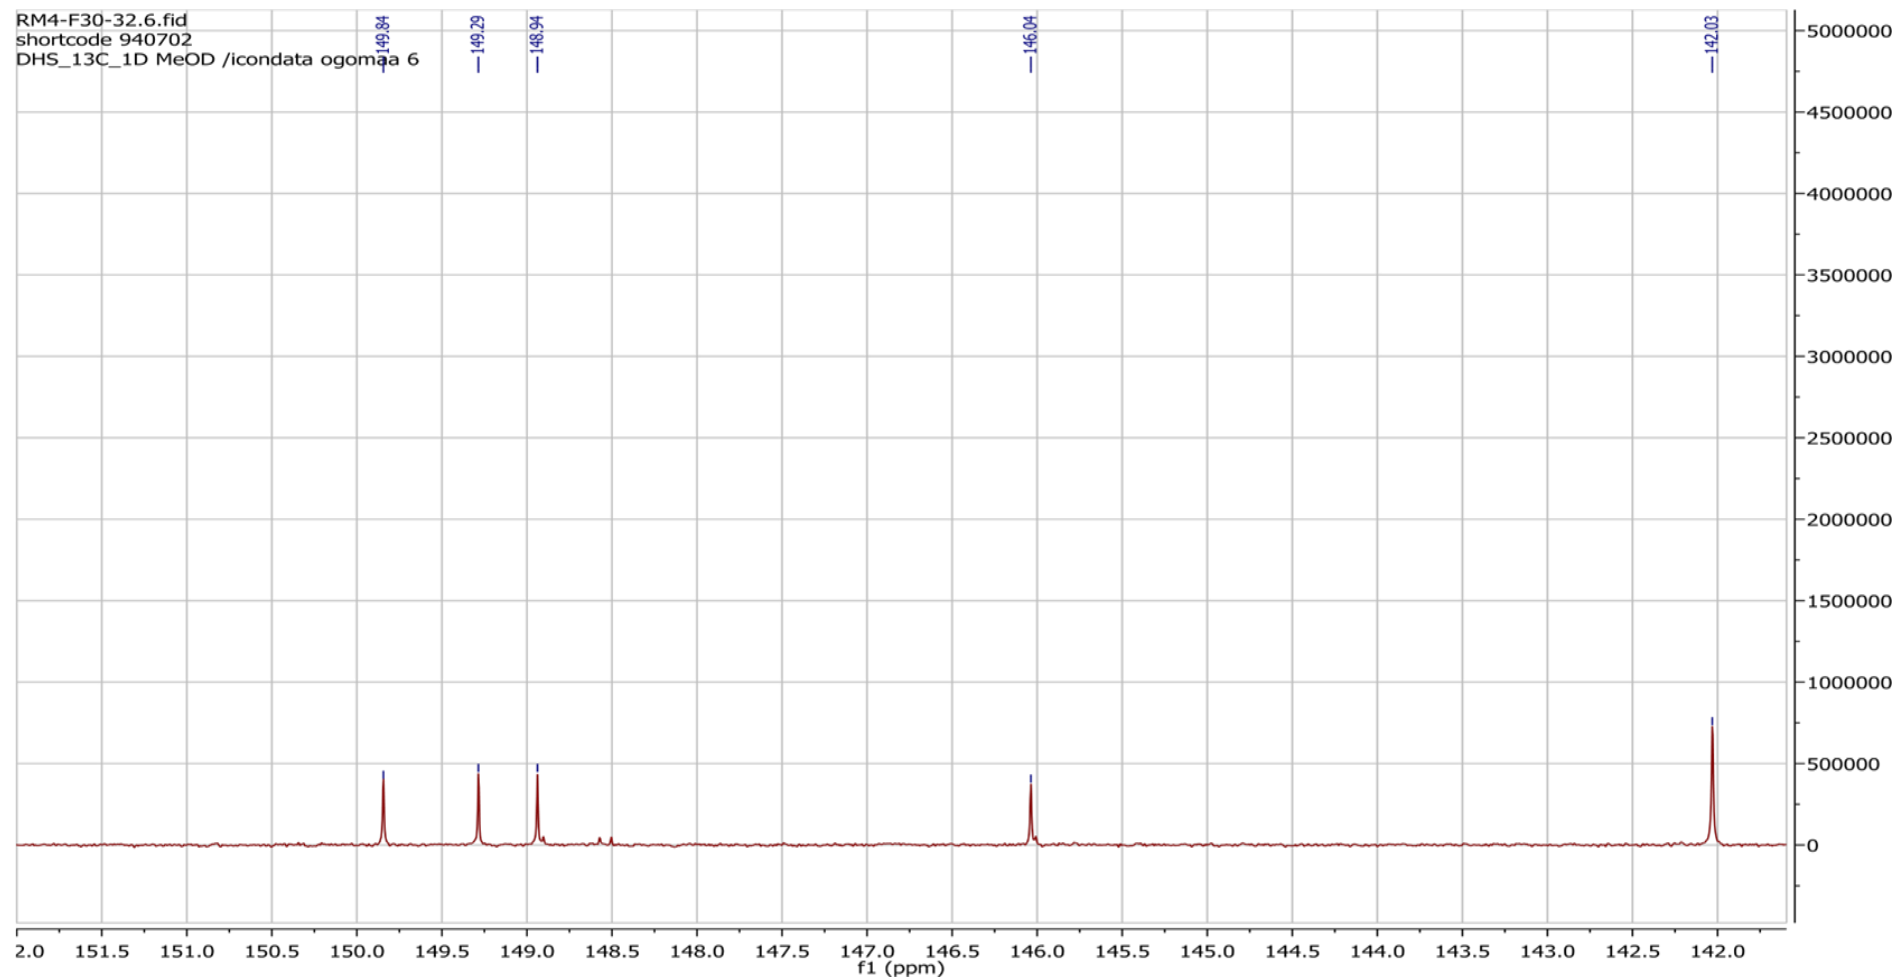

**Figure. S 30 Partial expansion of  $^{13}\text{C}$ -NMR spectrum of compound 3 (150 MHz,  $\text{CD}_3\text{OD}$ )**

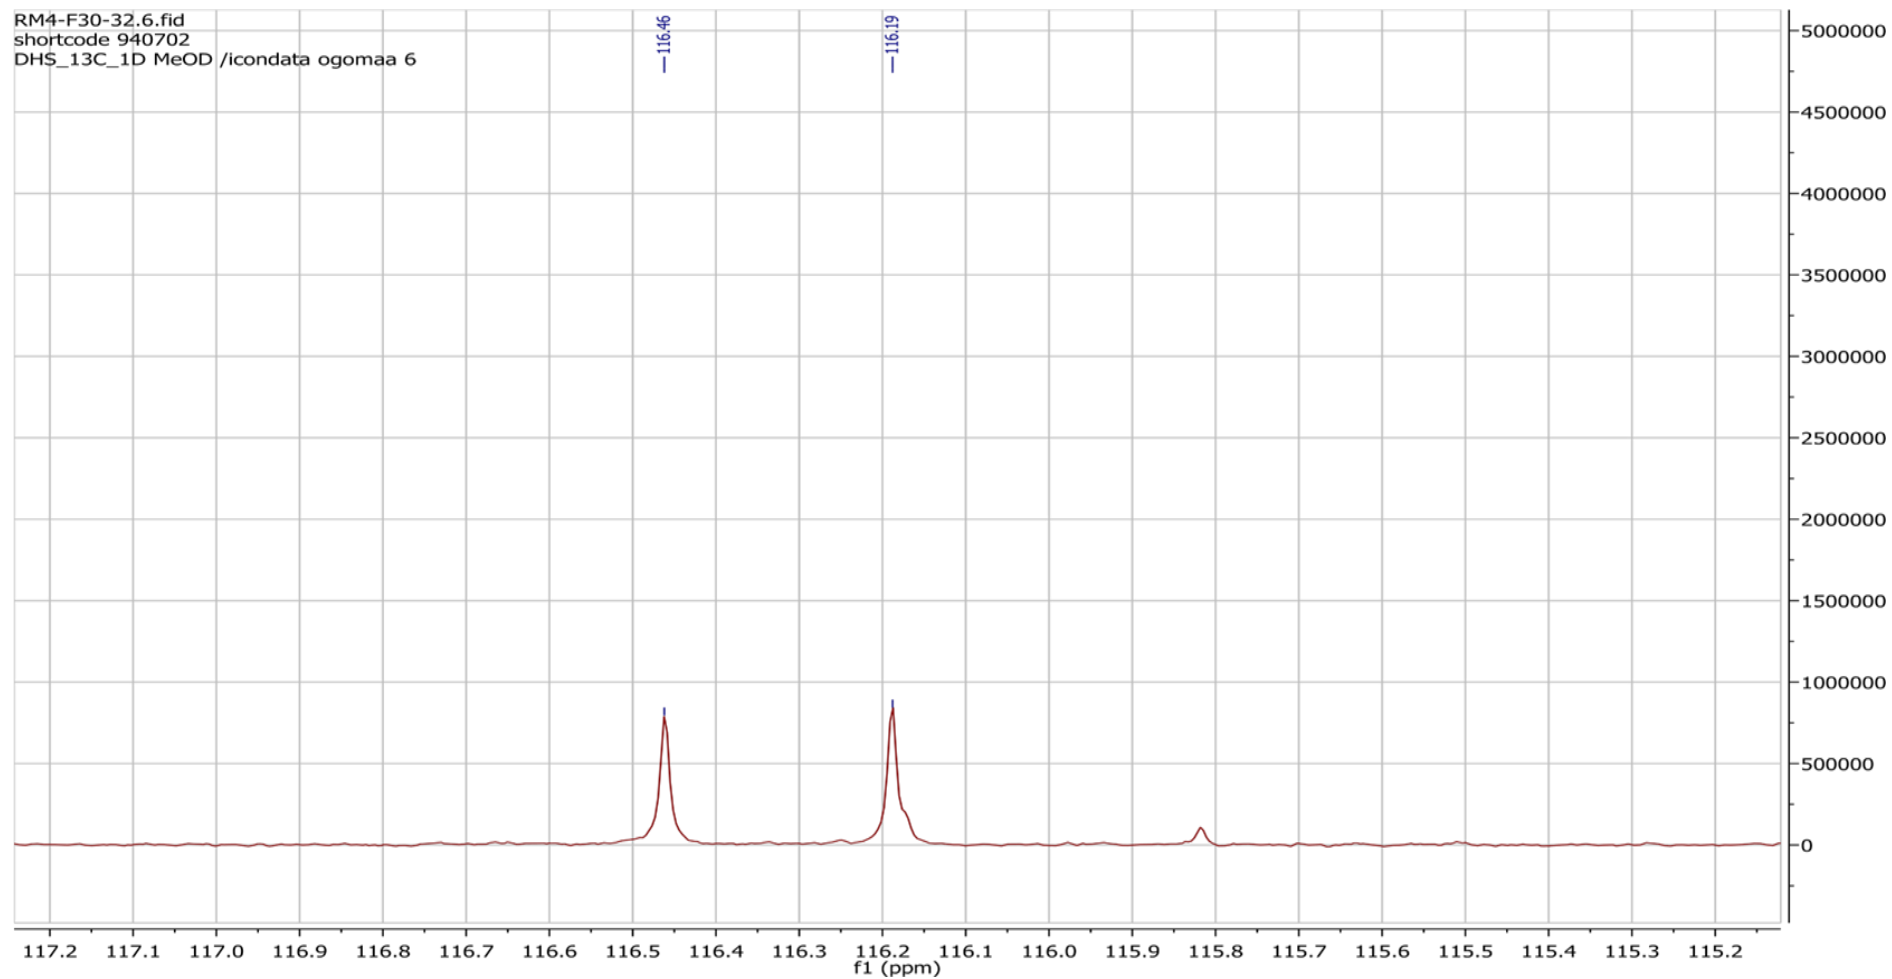

**Figure. S 31** Partial expansion of  $^{13}\text{C}$ -NMR spectrum of compound 3 (150 MHz,  $\text{CD}_3\text{OD}$ )

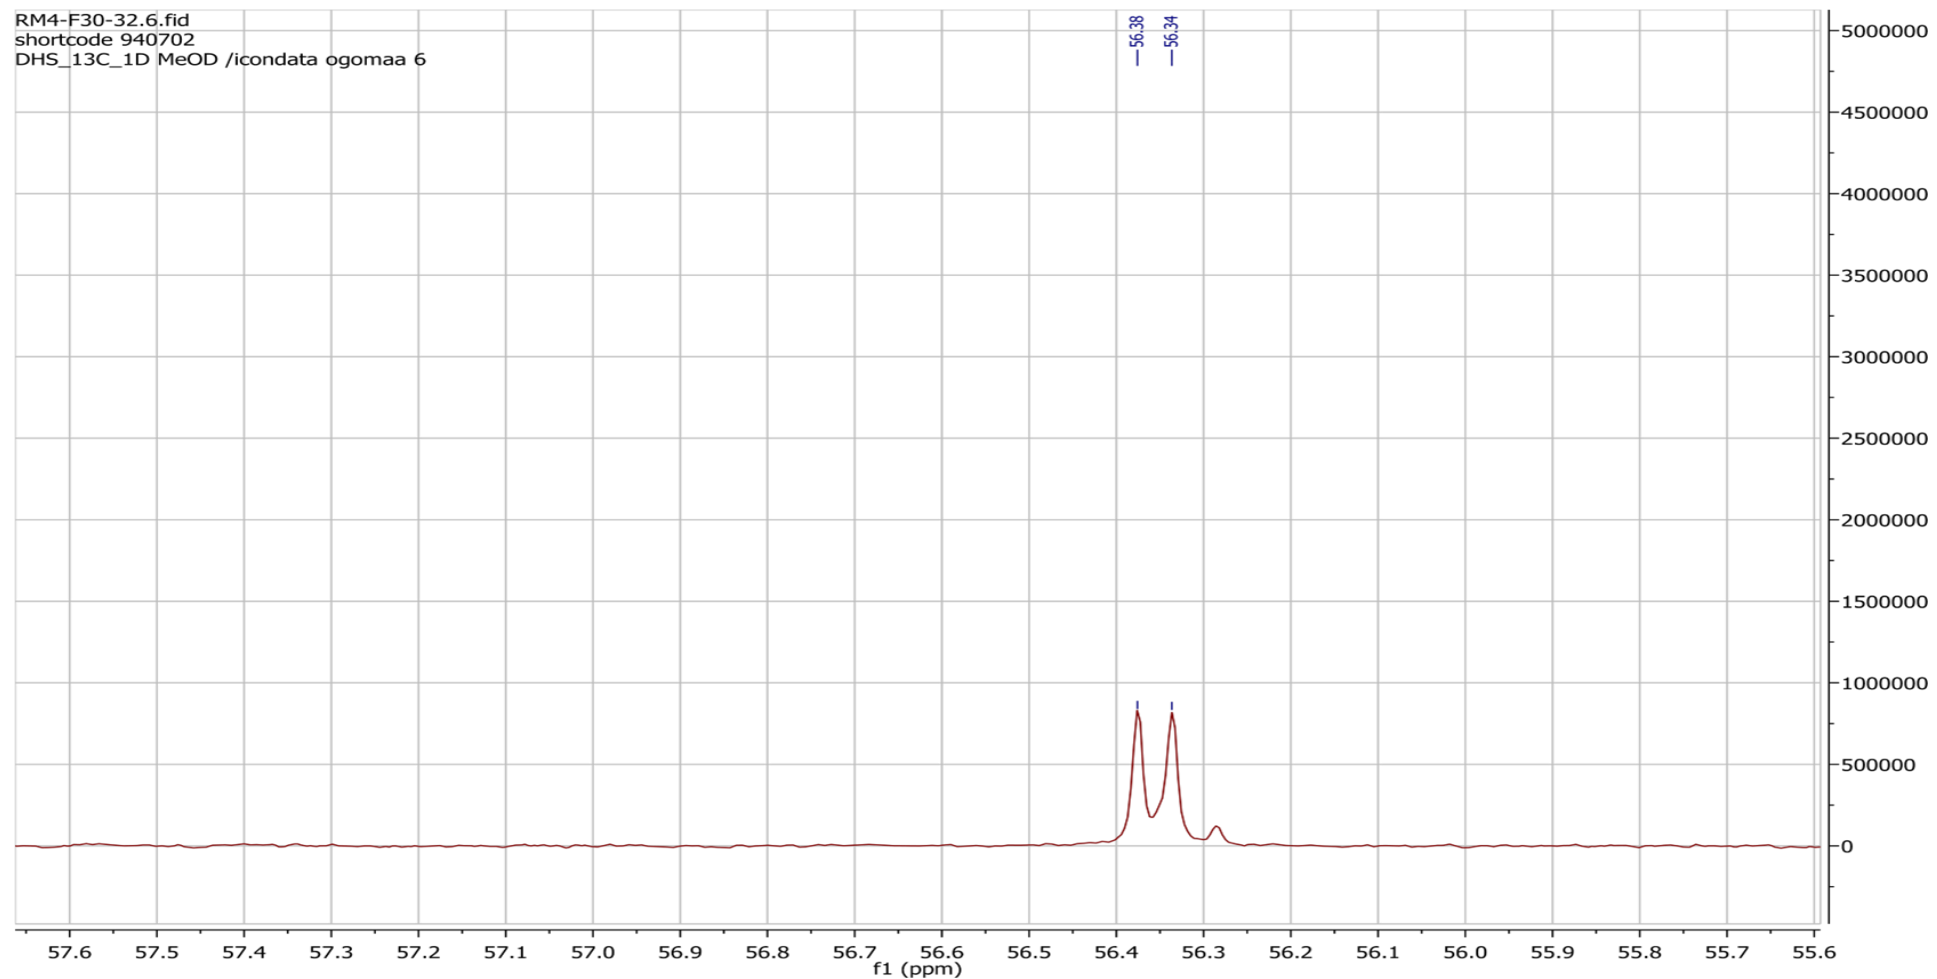

**Figure. S 32** Partial expansion of  $^{13}\text{C}$ -NMR spectrum of compound 3 (150 MHz,  $\text{CD}_3\text{OD}$ )

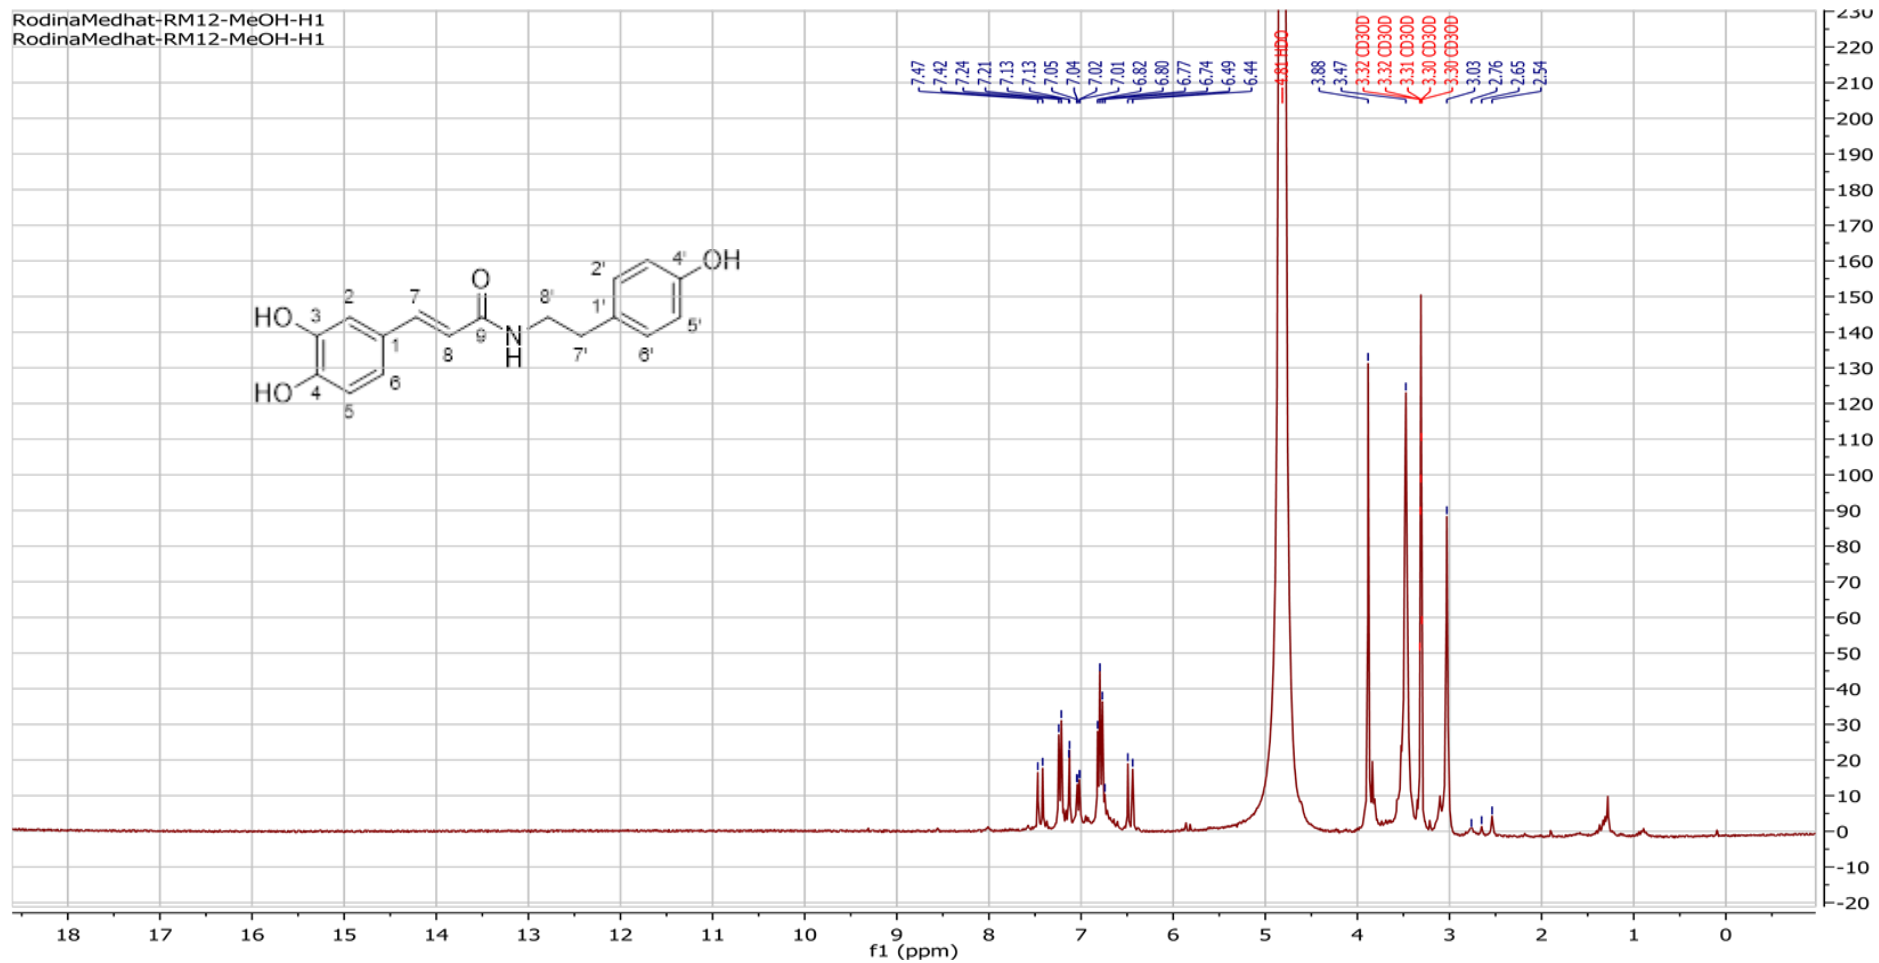

Figure. S 33  $^1\text{H-NMR}$  spectrum of compound 4 (300 MHz,  $\text{CD}_3\text{OD}$ )

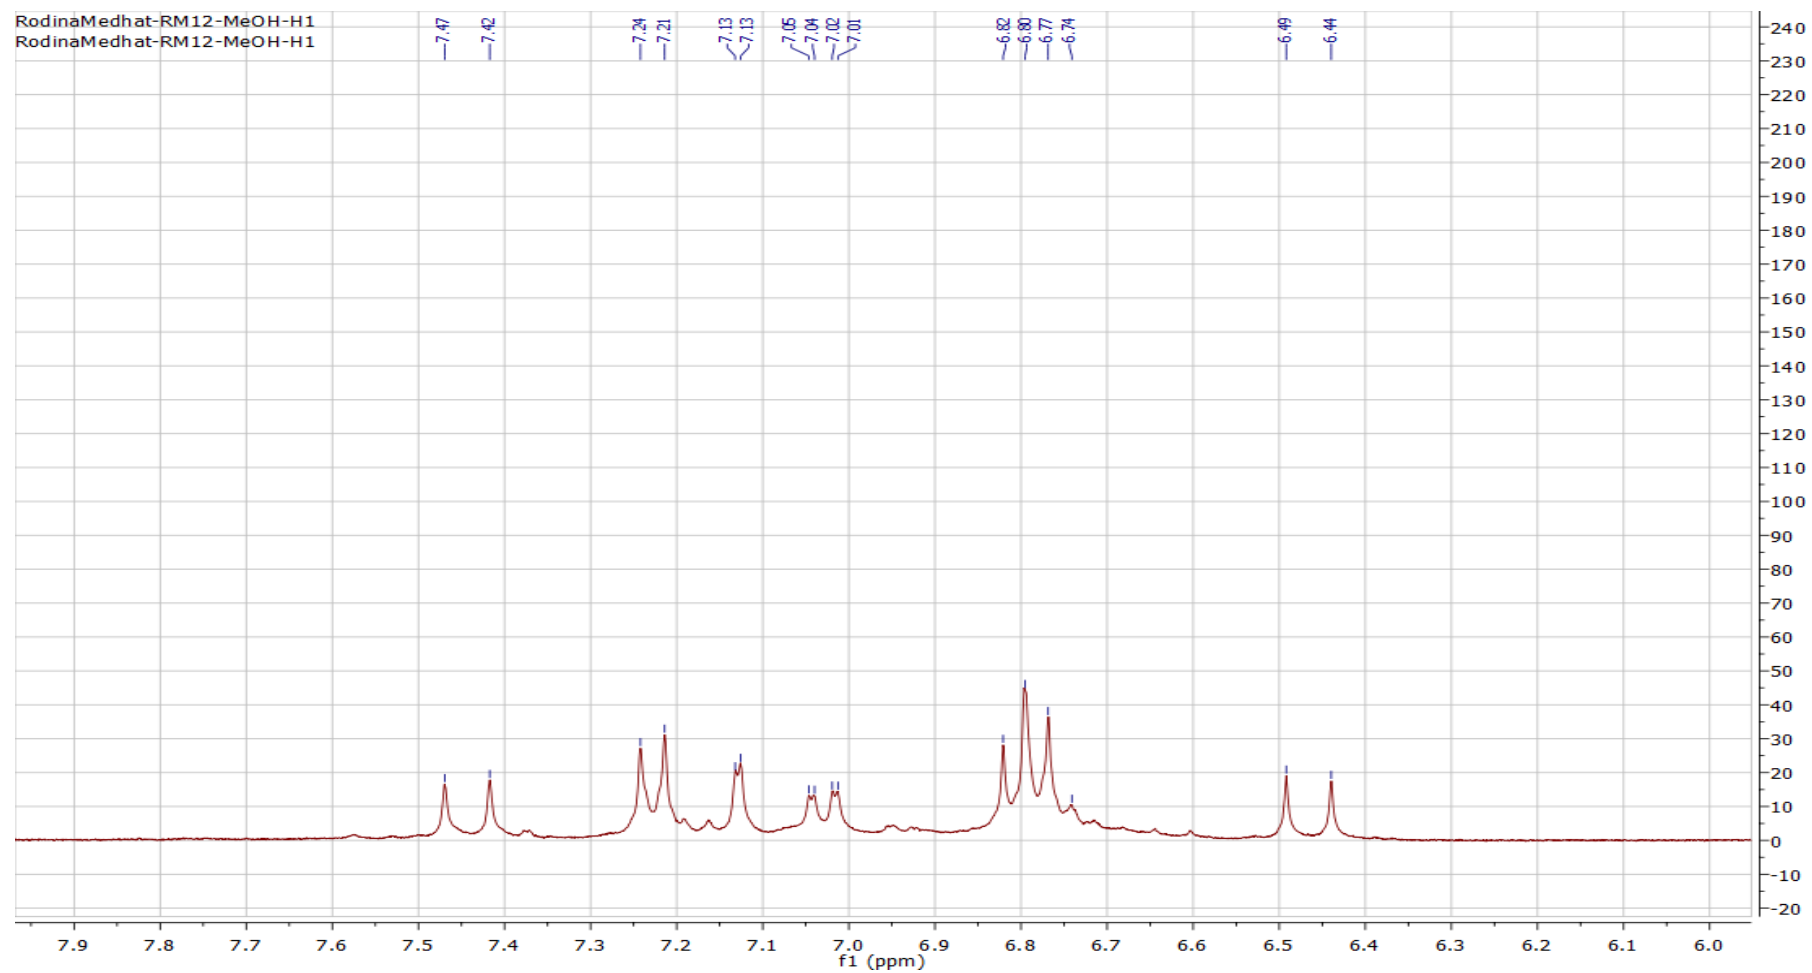

**Figure. S 34** Partial expansion of  $^1\text{H}$ -NMR spectrum of compound **4** (300 MHz,  $\text{CD}_3\text{OD}$ )

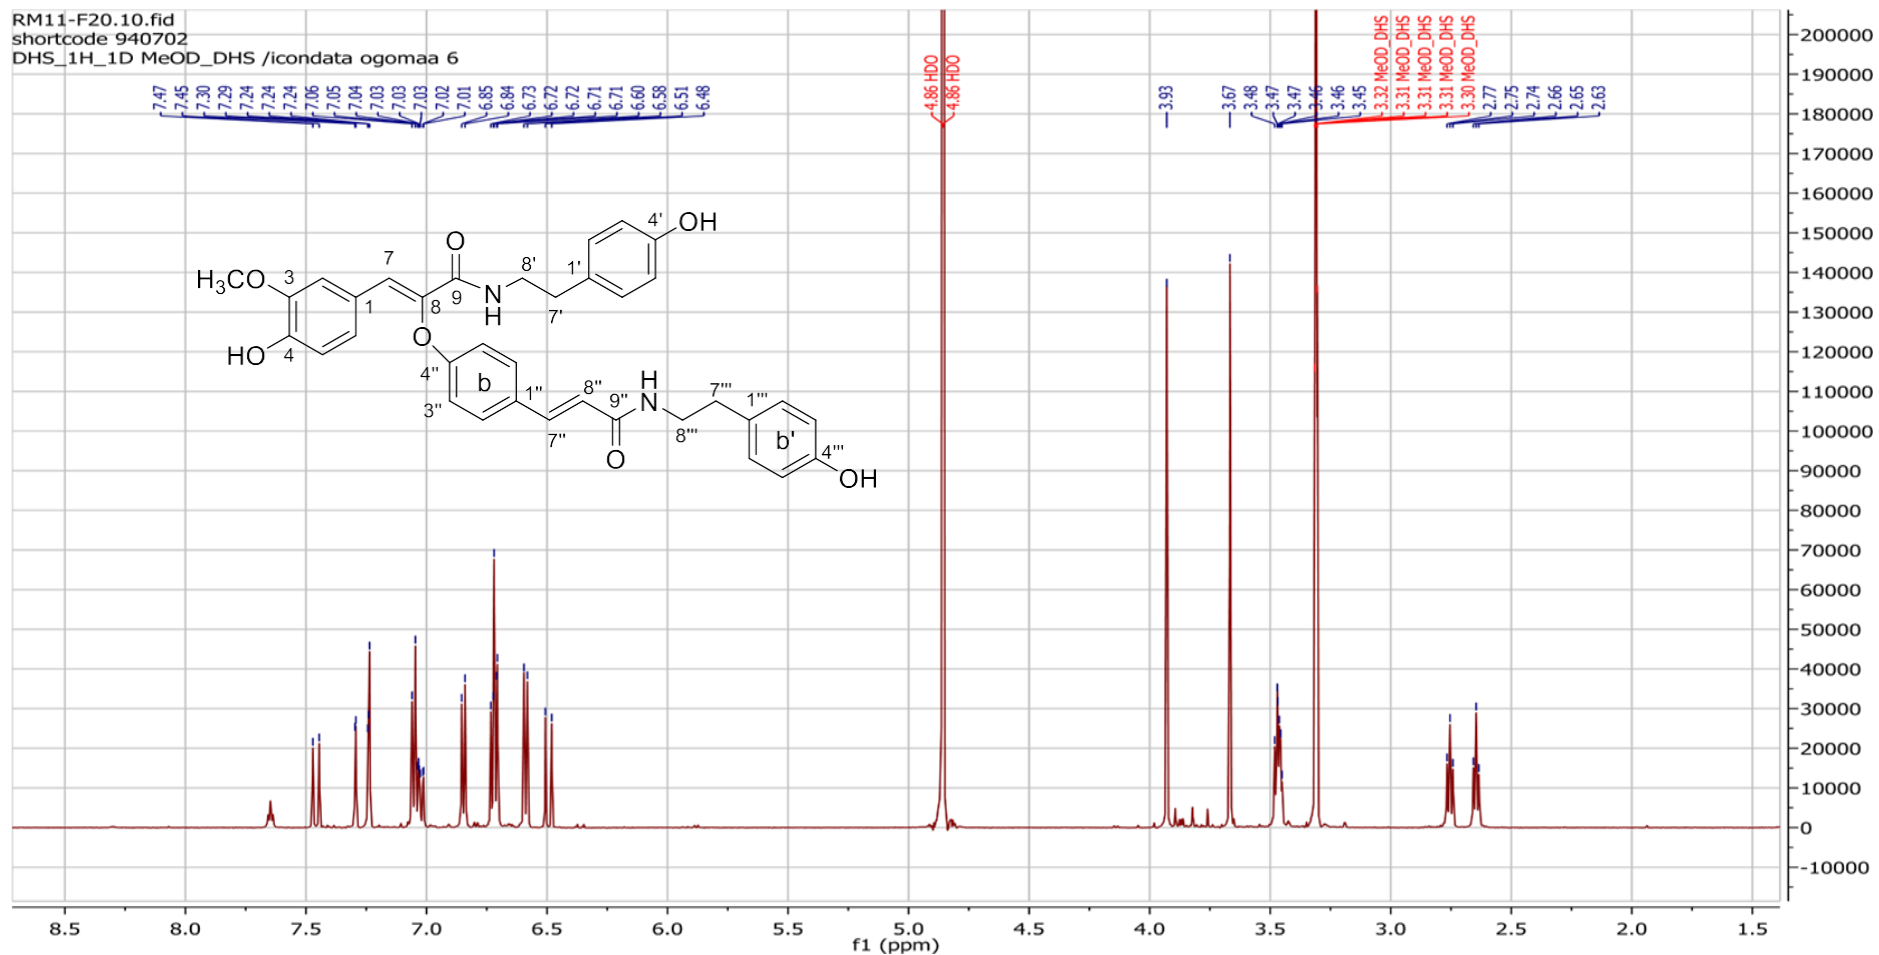

Figure. S 35 <sup>1</sup>H-NMR spectrum of compound 5 (600 MHz, CD<sub>3</sub>OD)

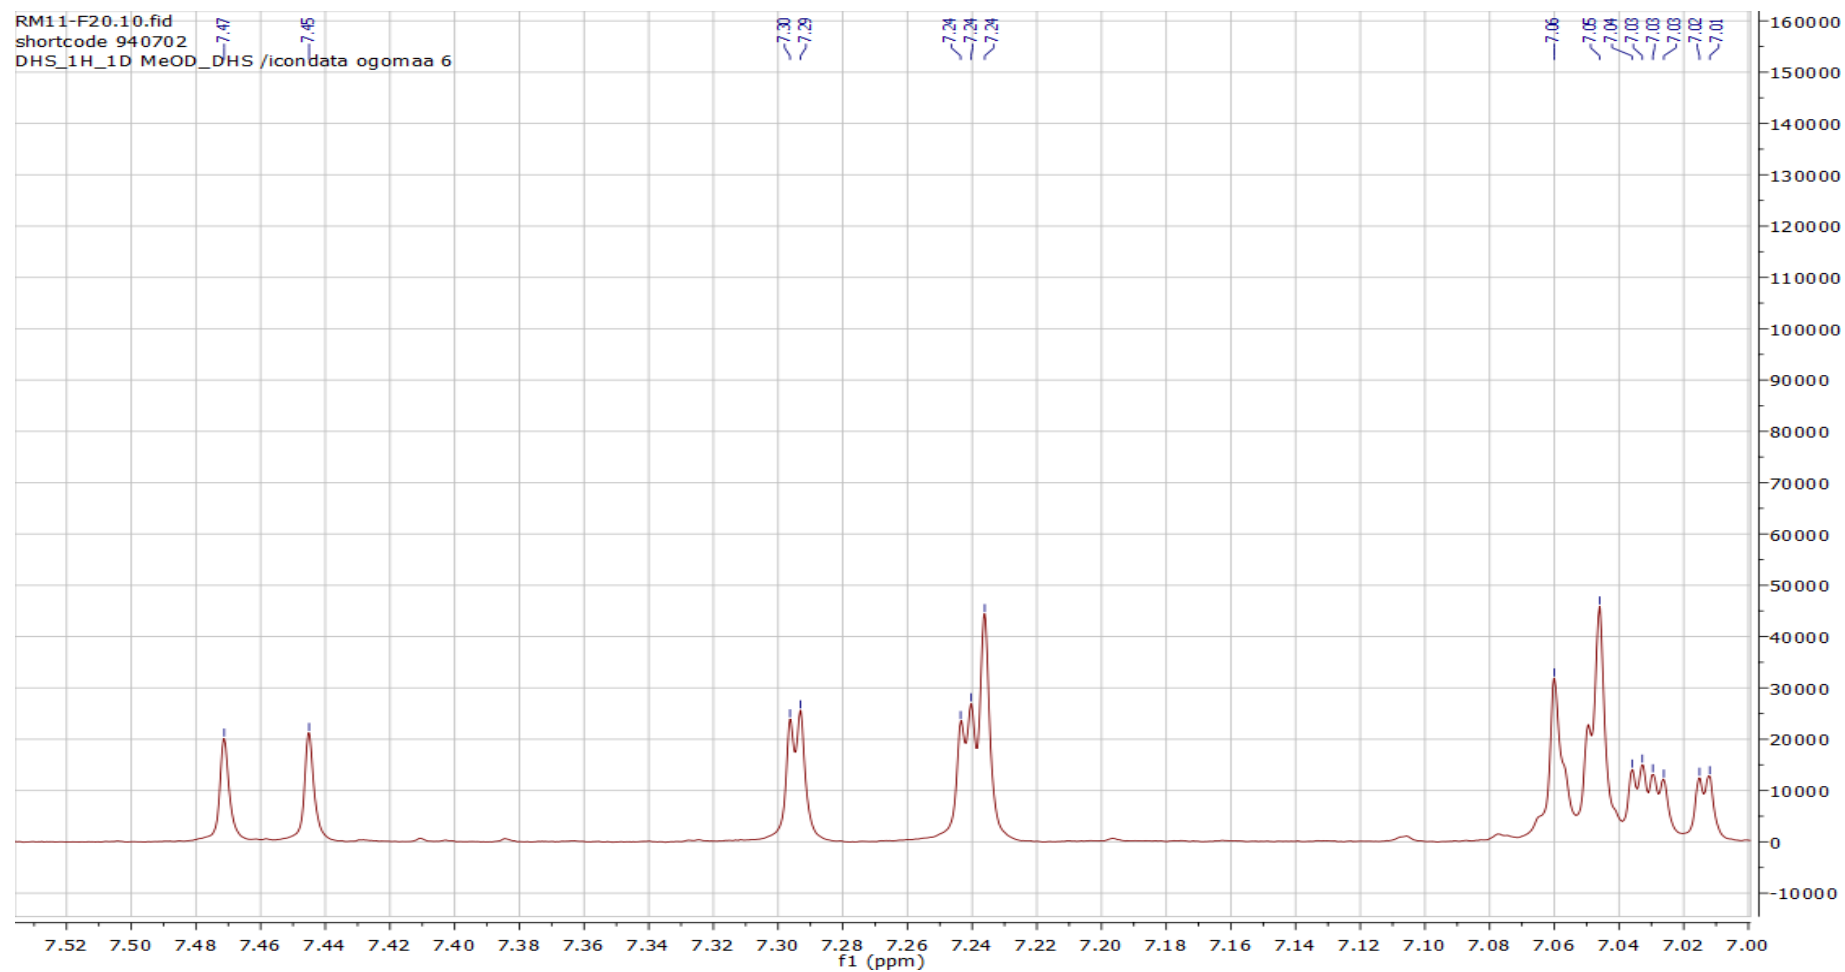

**Figure. S 36 Partial expansion of  $^1\text{H}$ -NMR spectrum of compound 5 (600 MHz,  $\text{CD}_3\text{OD}$ )**

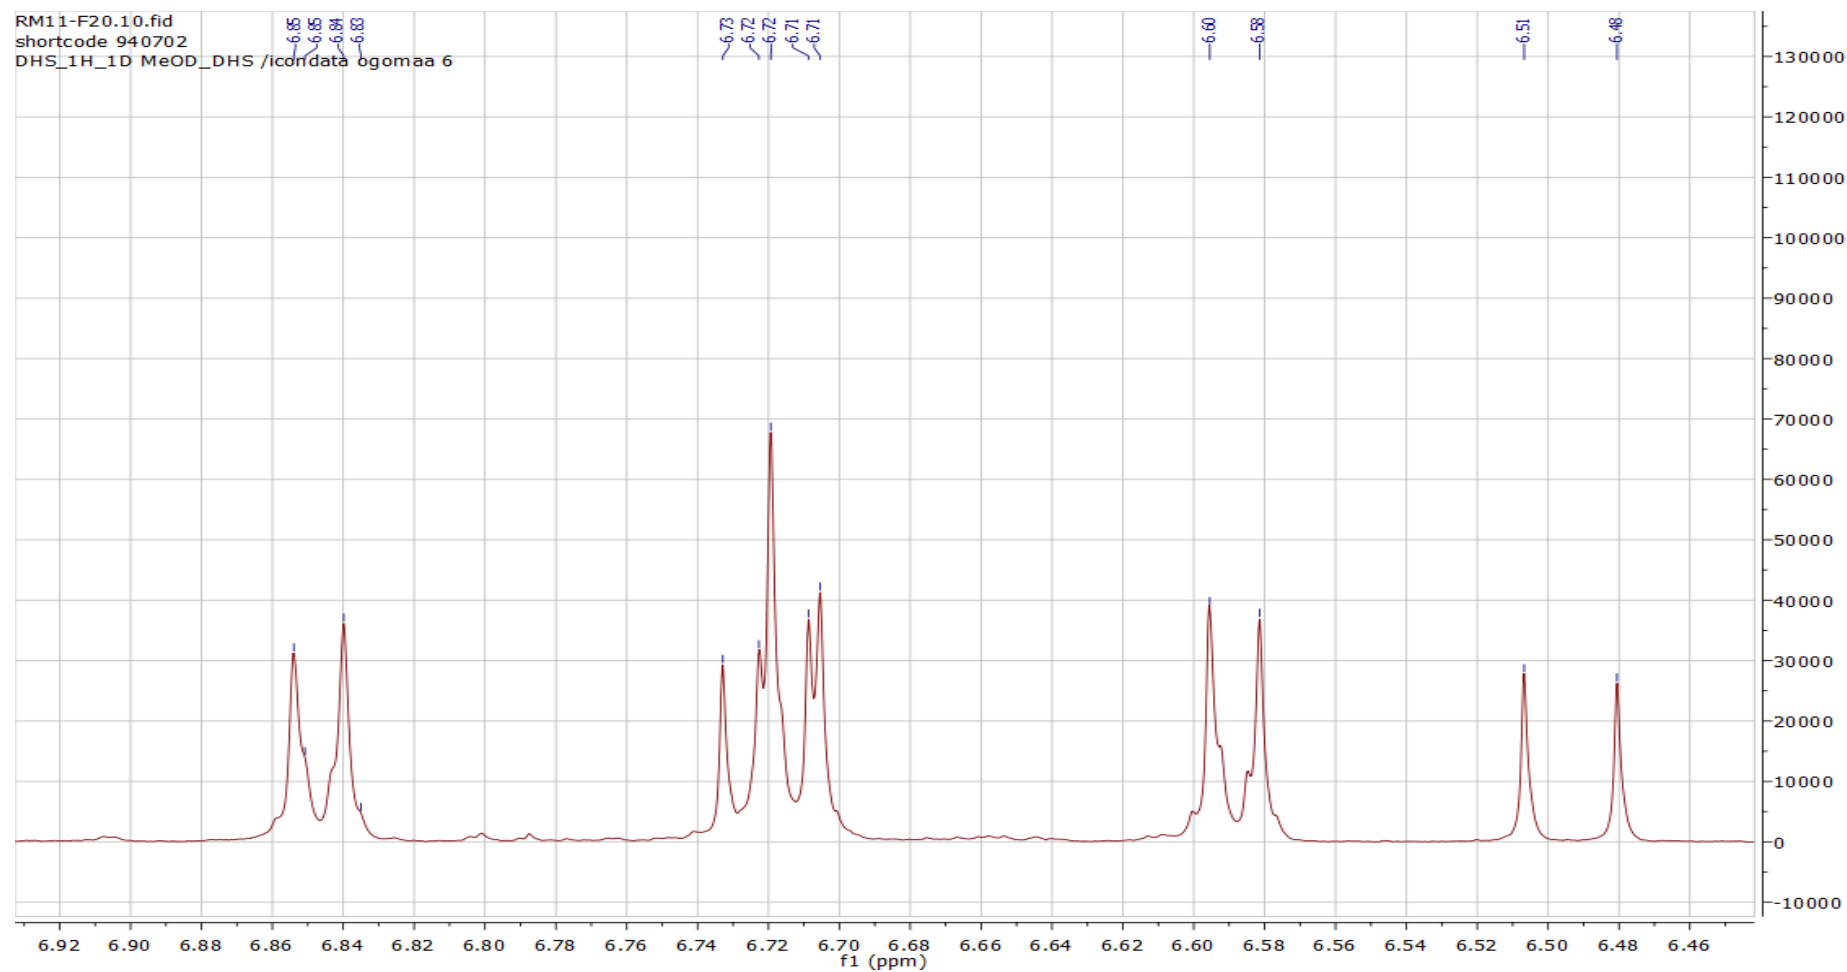

**Figure. S 37** Partial expansion of <sup>1</sup>H-NMR spectrum of compound 5 (600 MHz, CD<sub>3</sub>OD)



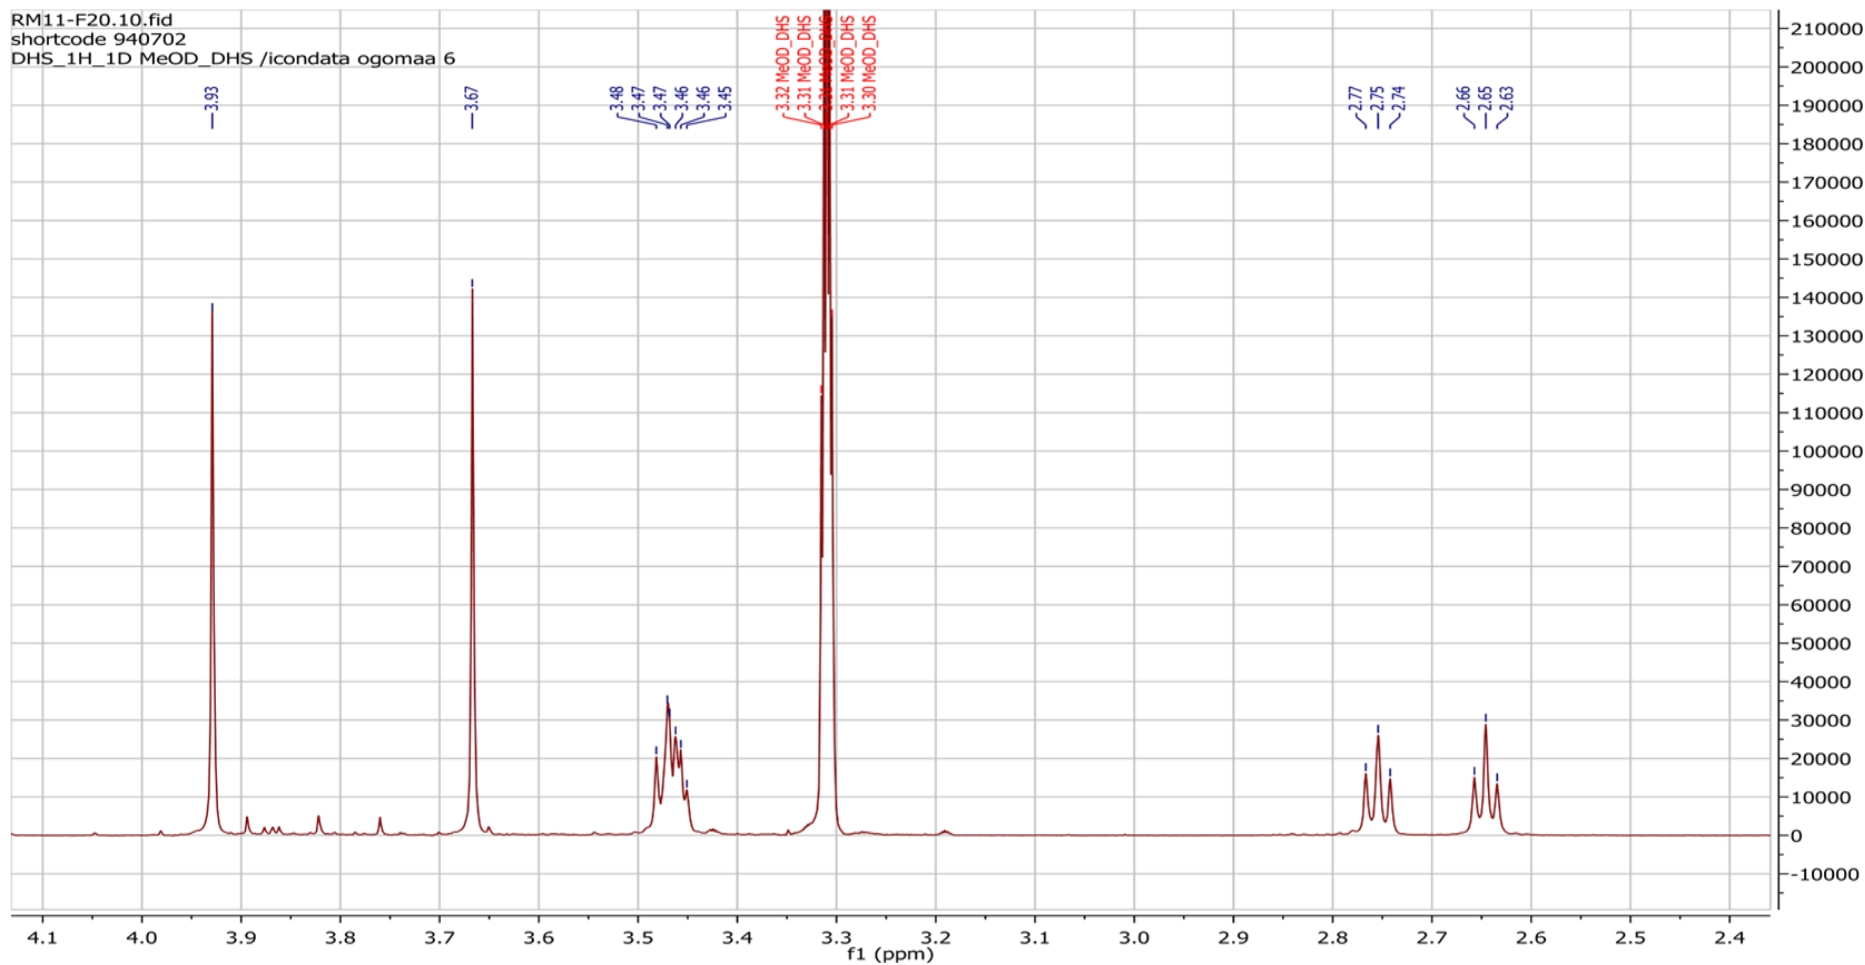

**Figure. S 38** Partial expansion of  $^1\text{H}$ -NMR spectrum of compound 5 (600 MHz,  $\text{CD}_3\text{OD}$ )

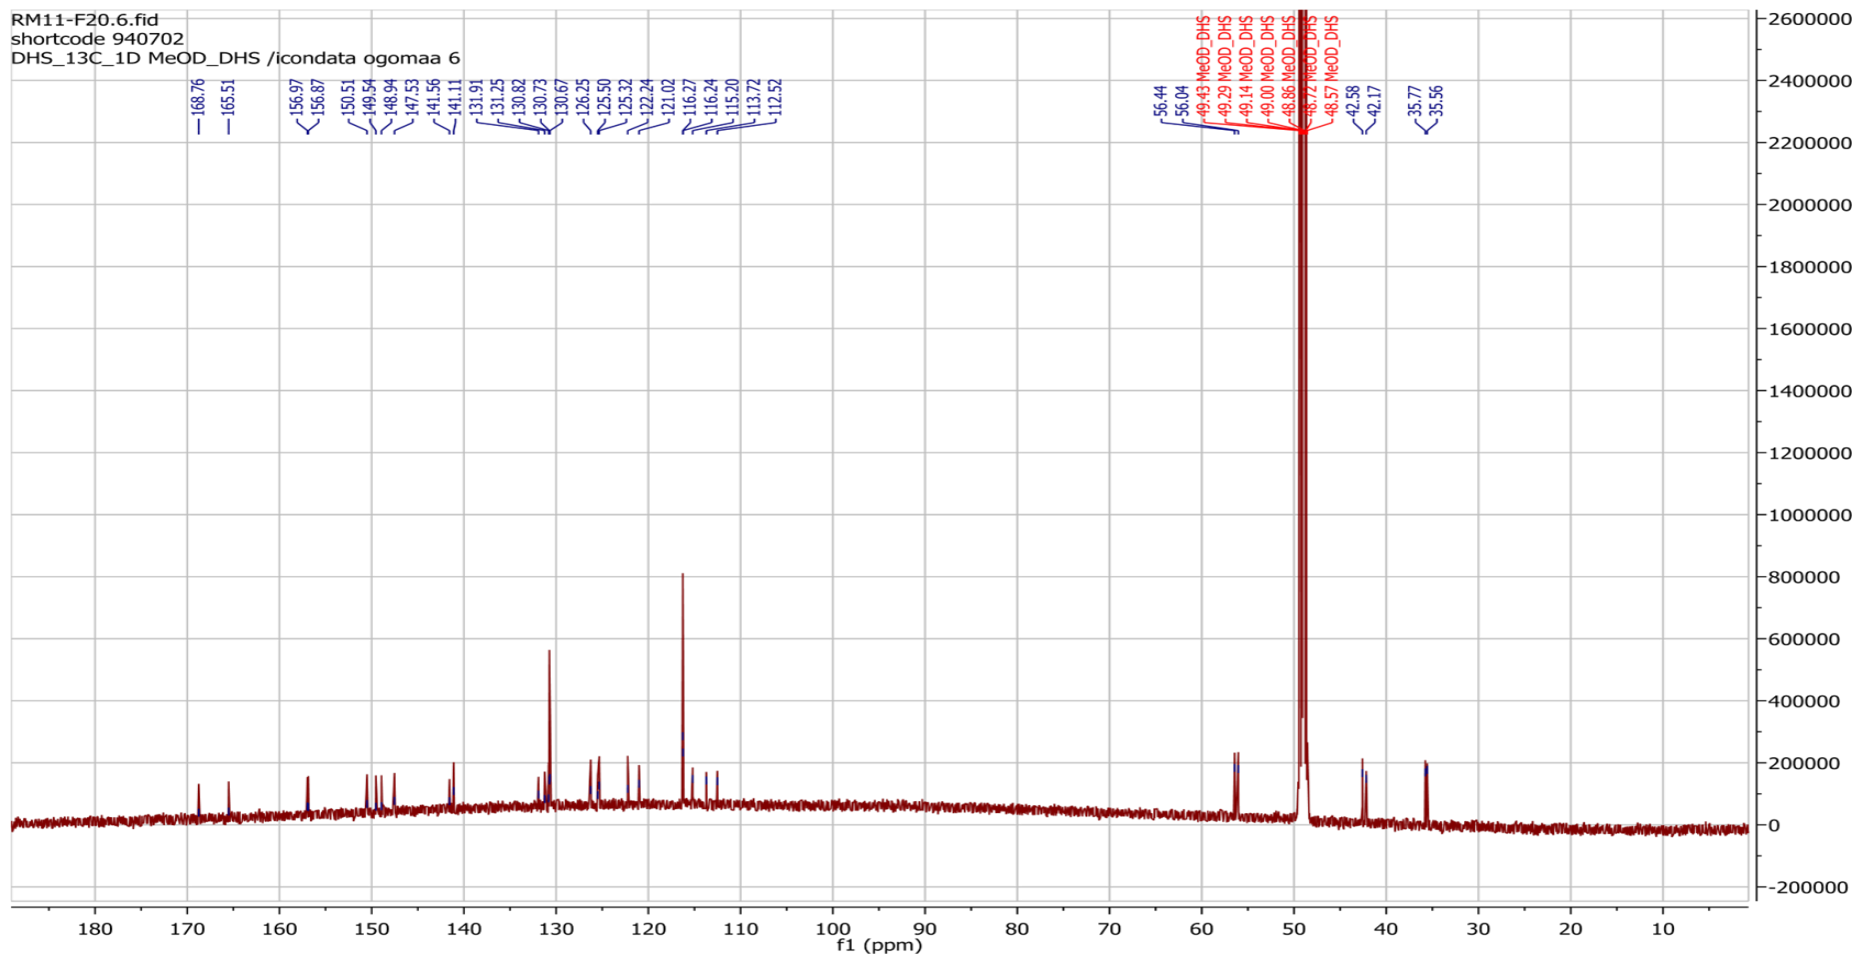

Figure. S 39  $^{13}\text{C}$ -NMR spectrum of compound 5 (150 MHz,  $\text{CD}_3\text{OD}$ )

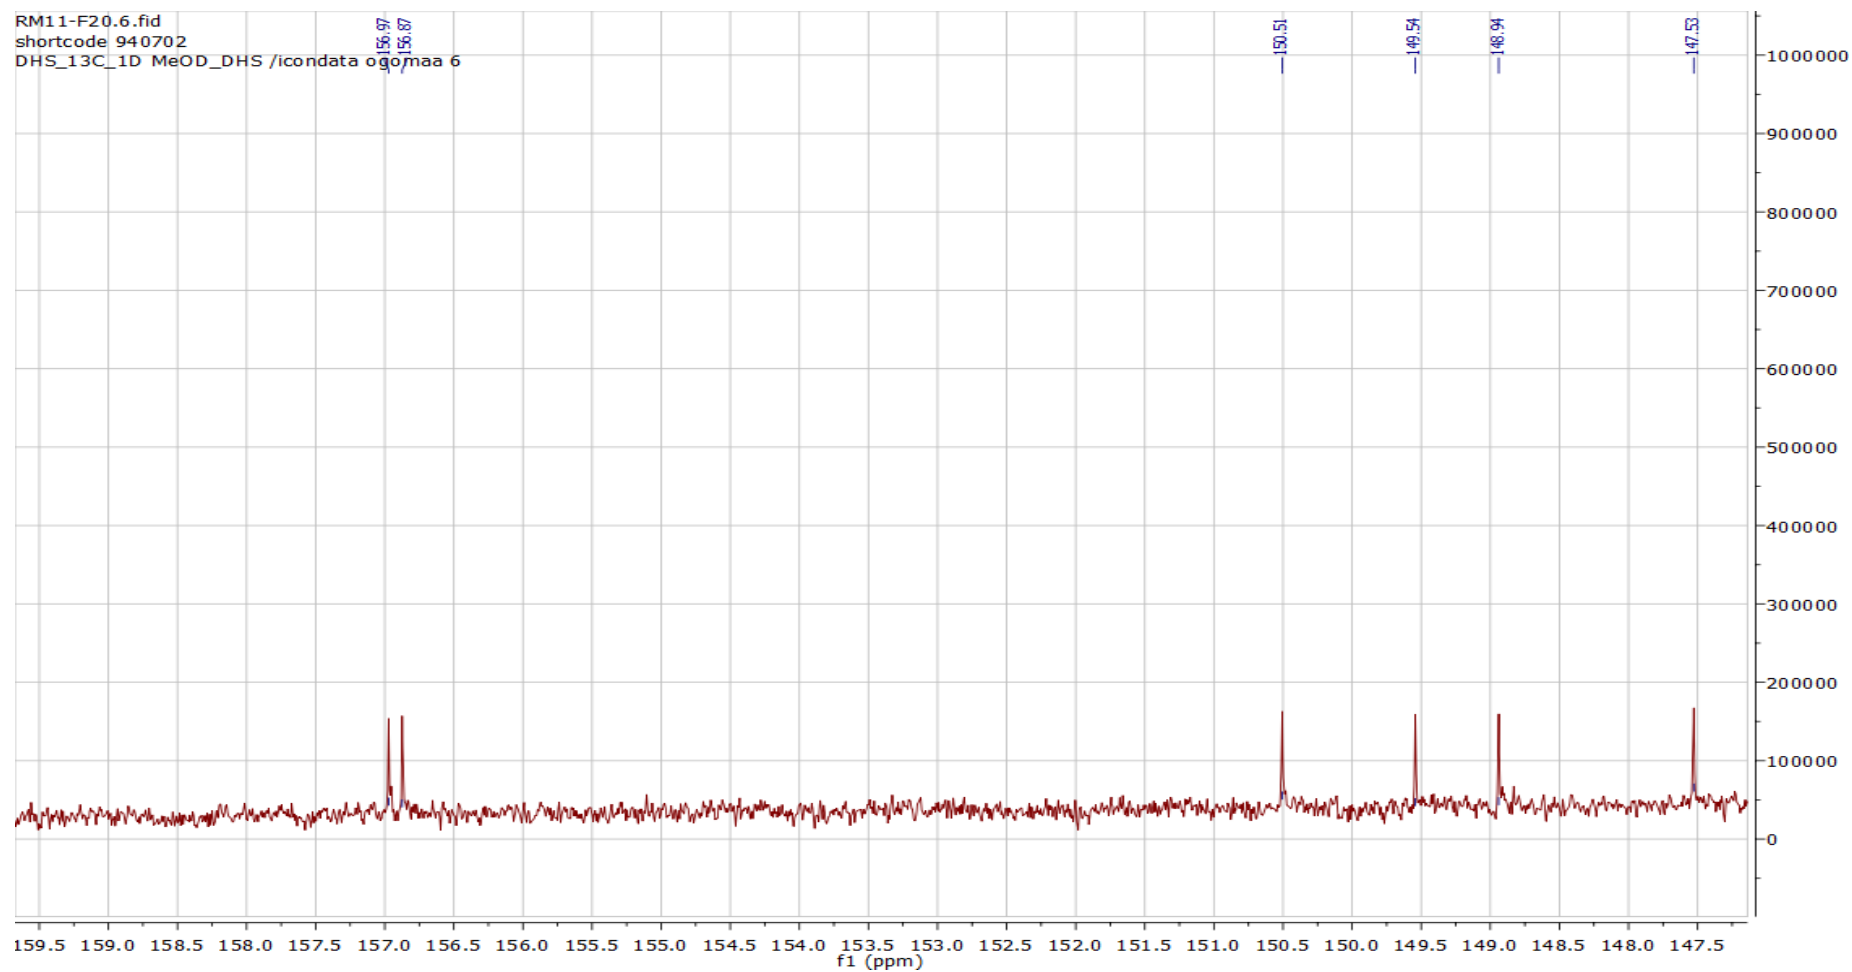

**Figure. S 40** Partial expansion of <sup>13</sup>C-NMR spectrum of compound 5 (150 MHz, CD<sub>3</sub>OD)

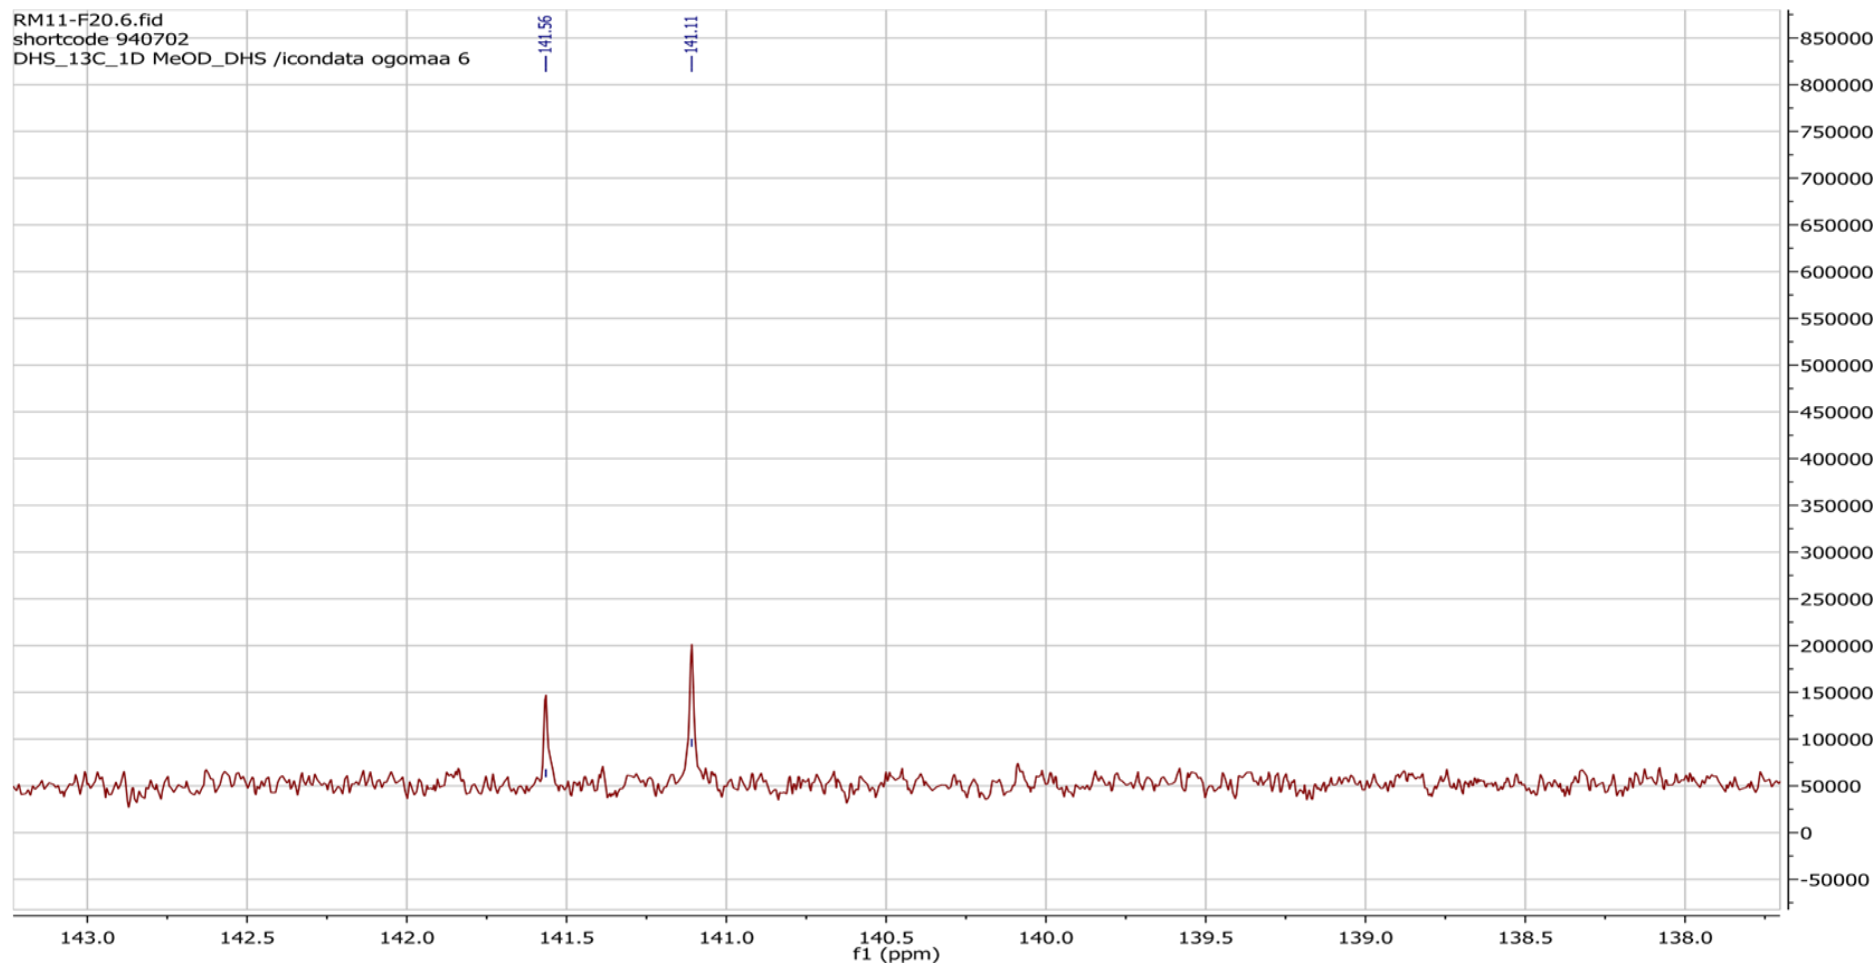

**Figure. S 41** Partial expansion of  $^{13}\text{C}$ -NMR spectrum of compound 5 (150 MHz,  $\text{CD}_3\text{OD}$ )

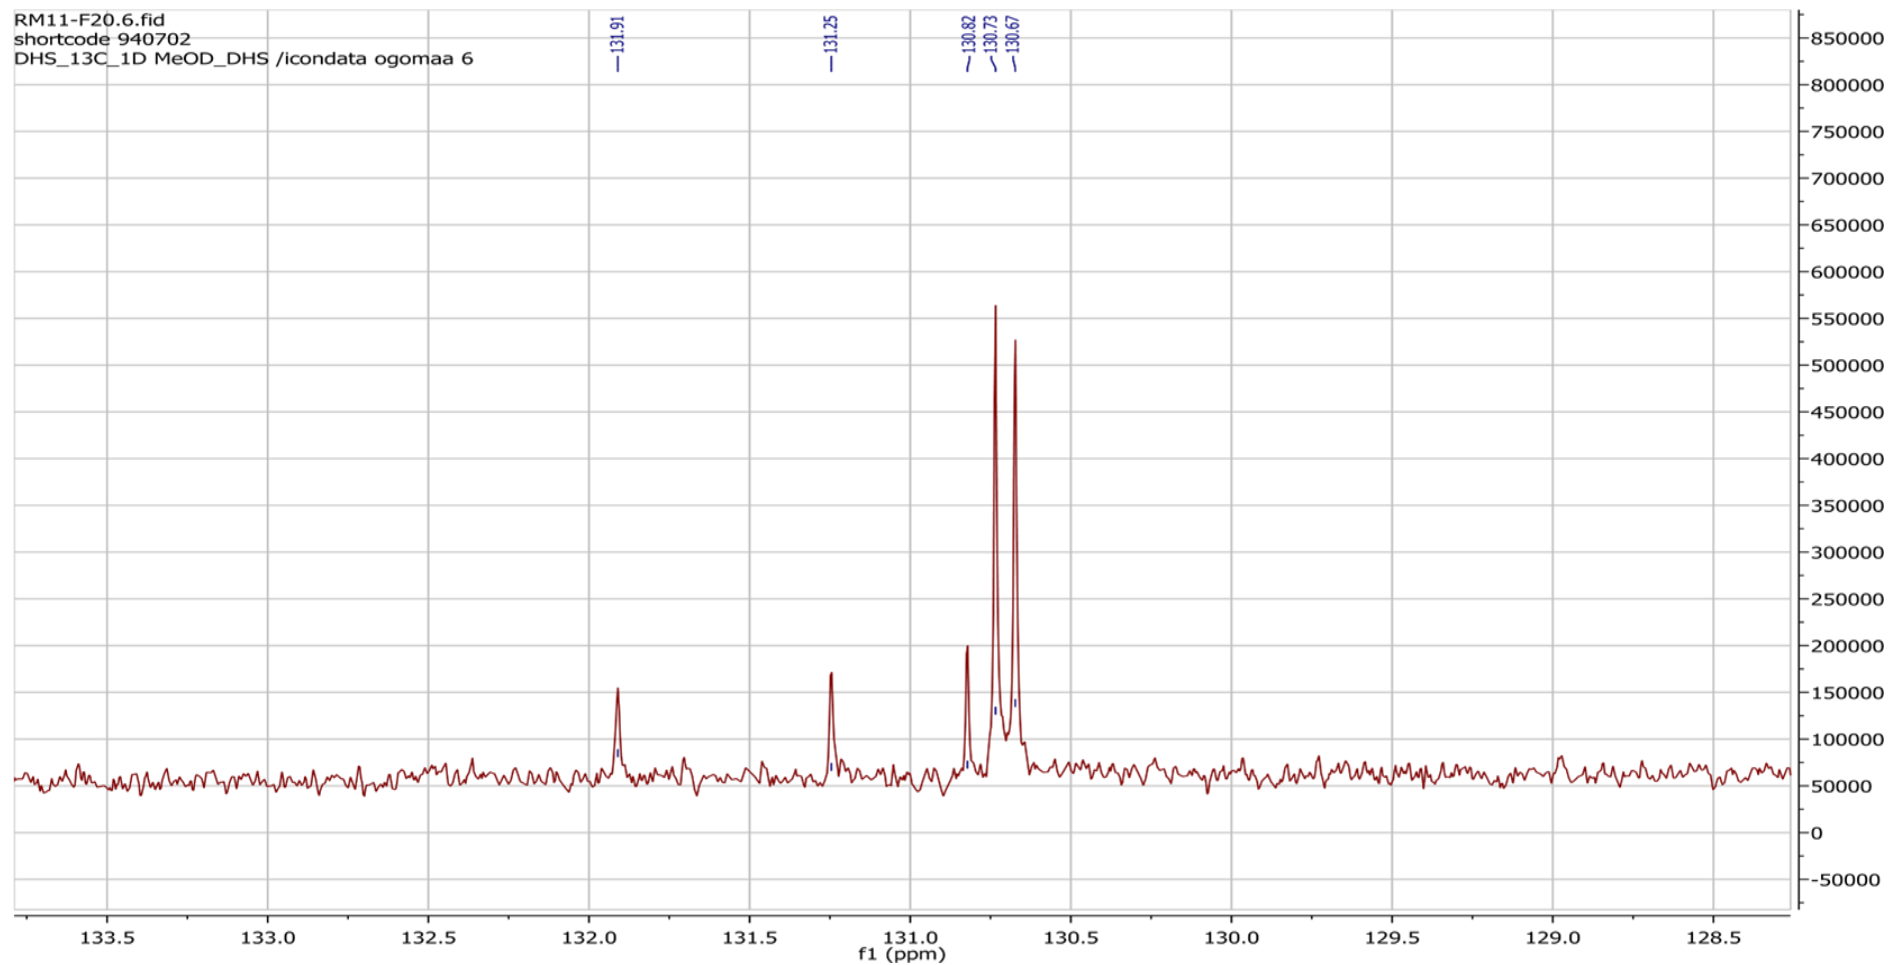

**Figure. S 42** Partial expansion of <sup>13</sup>C-NMR spectrum of compound **5** (150 MHz, CD<sub>3</sub>OD)

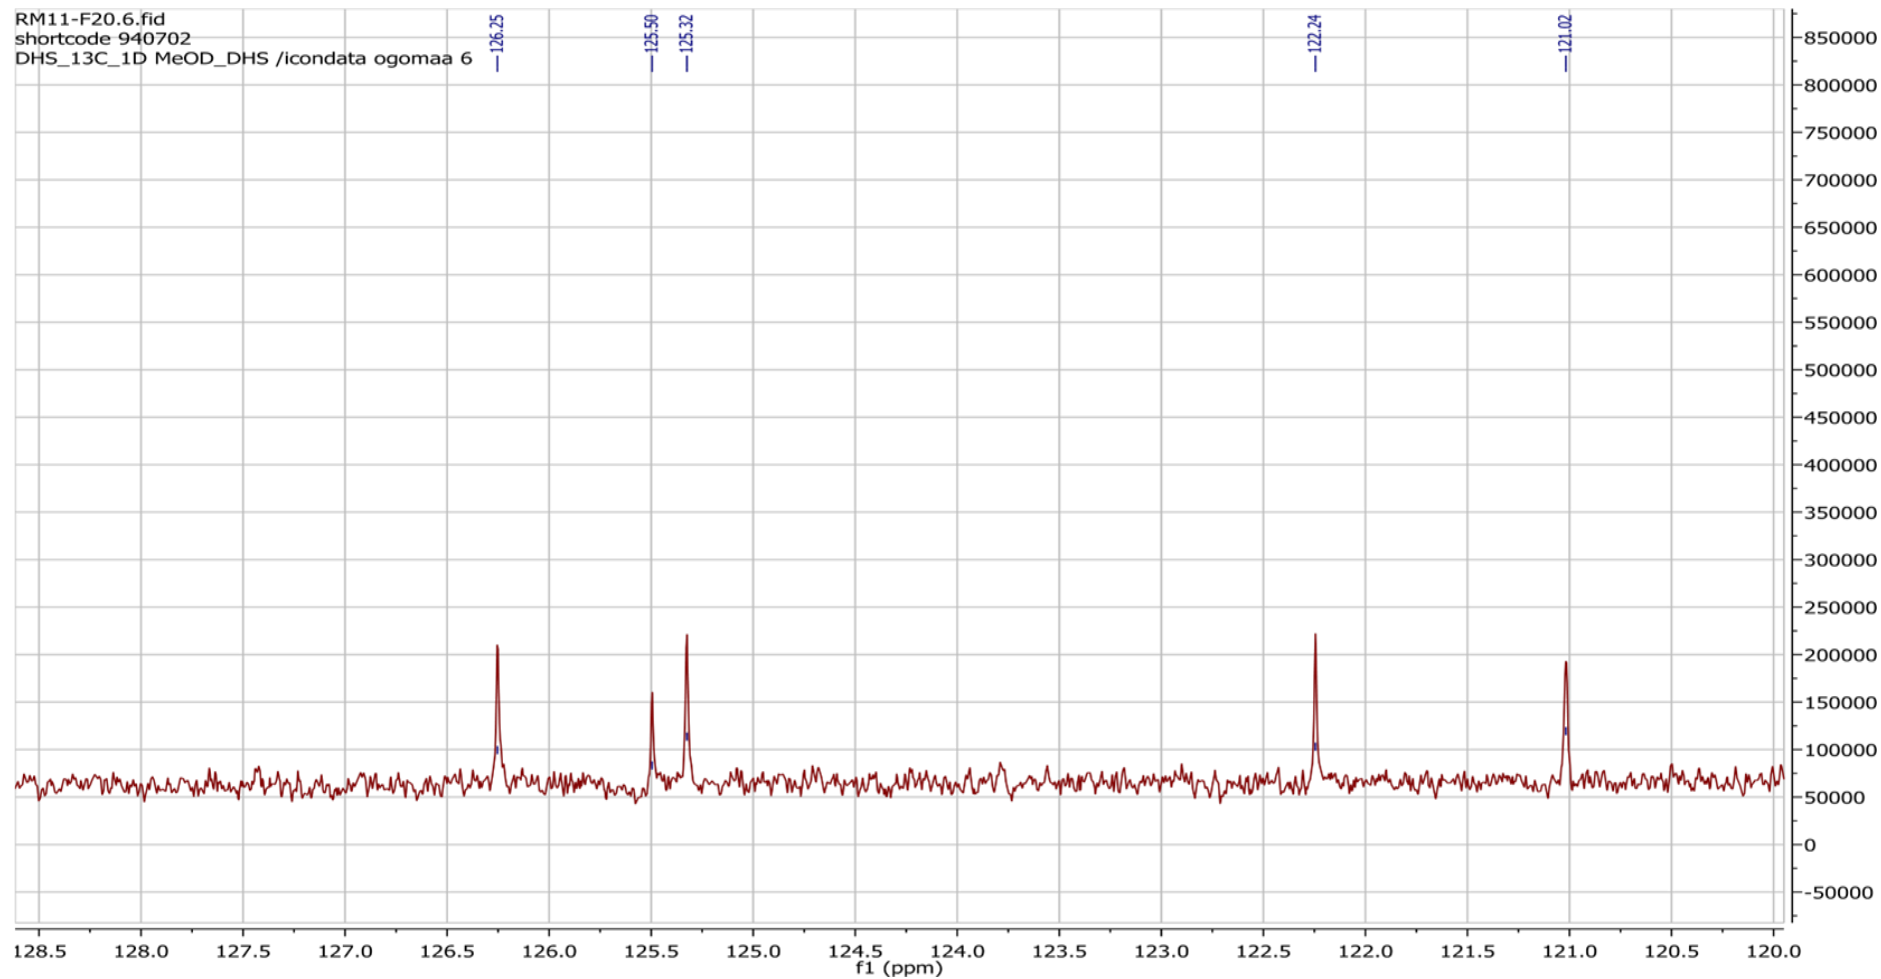

**Figure. S 43 Partial expansion of <sup>13</sup>C-NMR spectrum of compound 5 (150 MHz, CD<sub>3</sub>OD)**

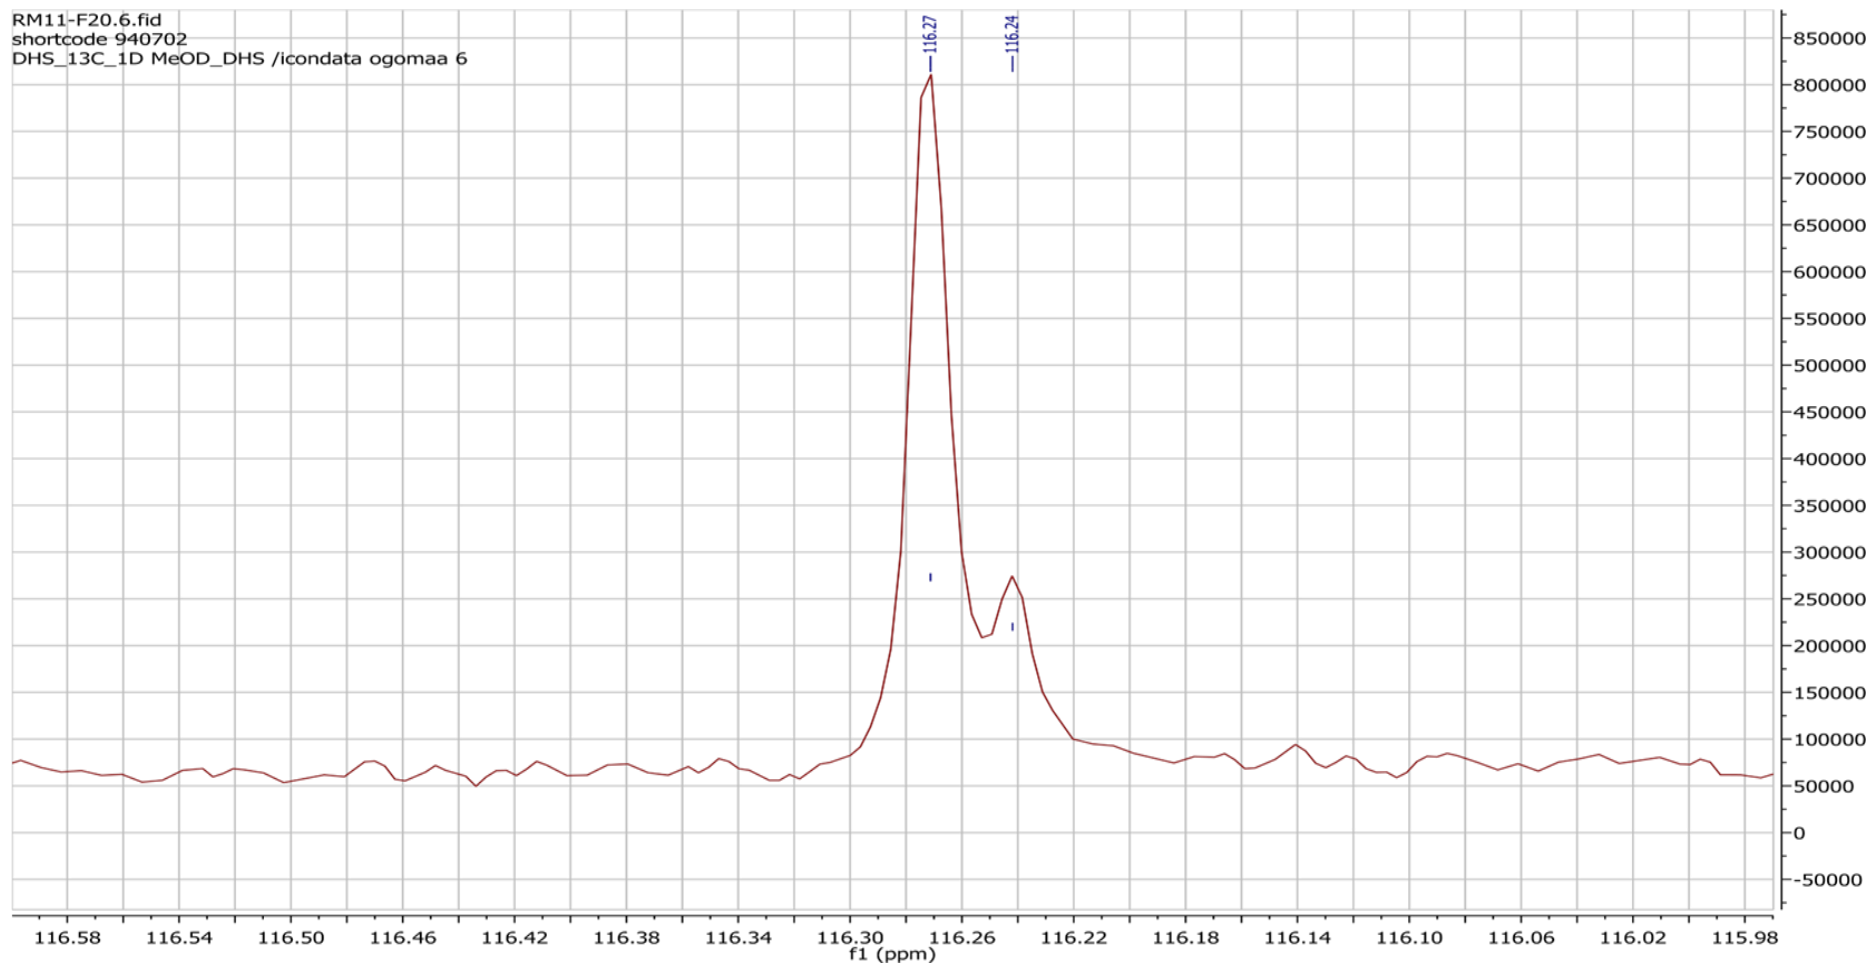

**Figure. S 44** Partial expansion of <sup>13</sup>C-NMR spectrum of compound 5 (150 MHz, CD<sub>3</sub>OD)

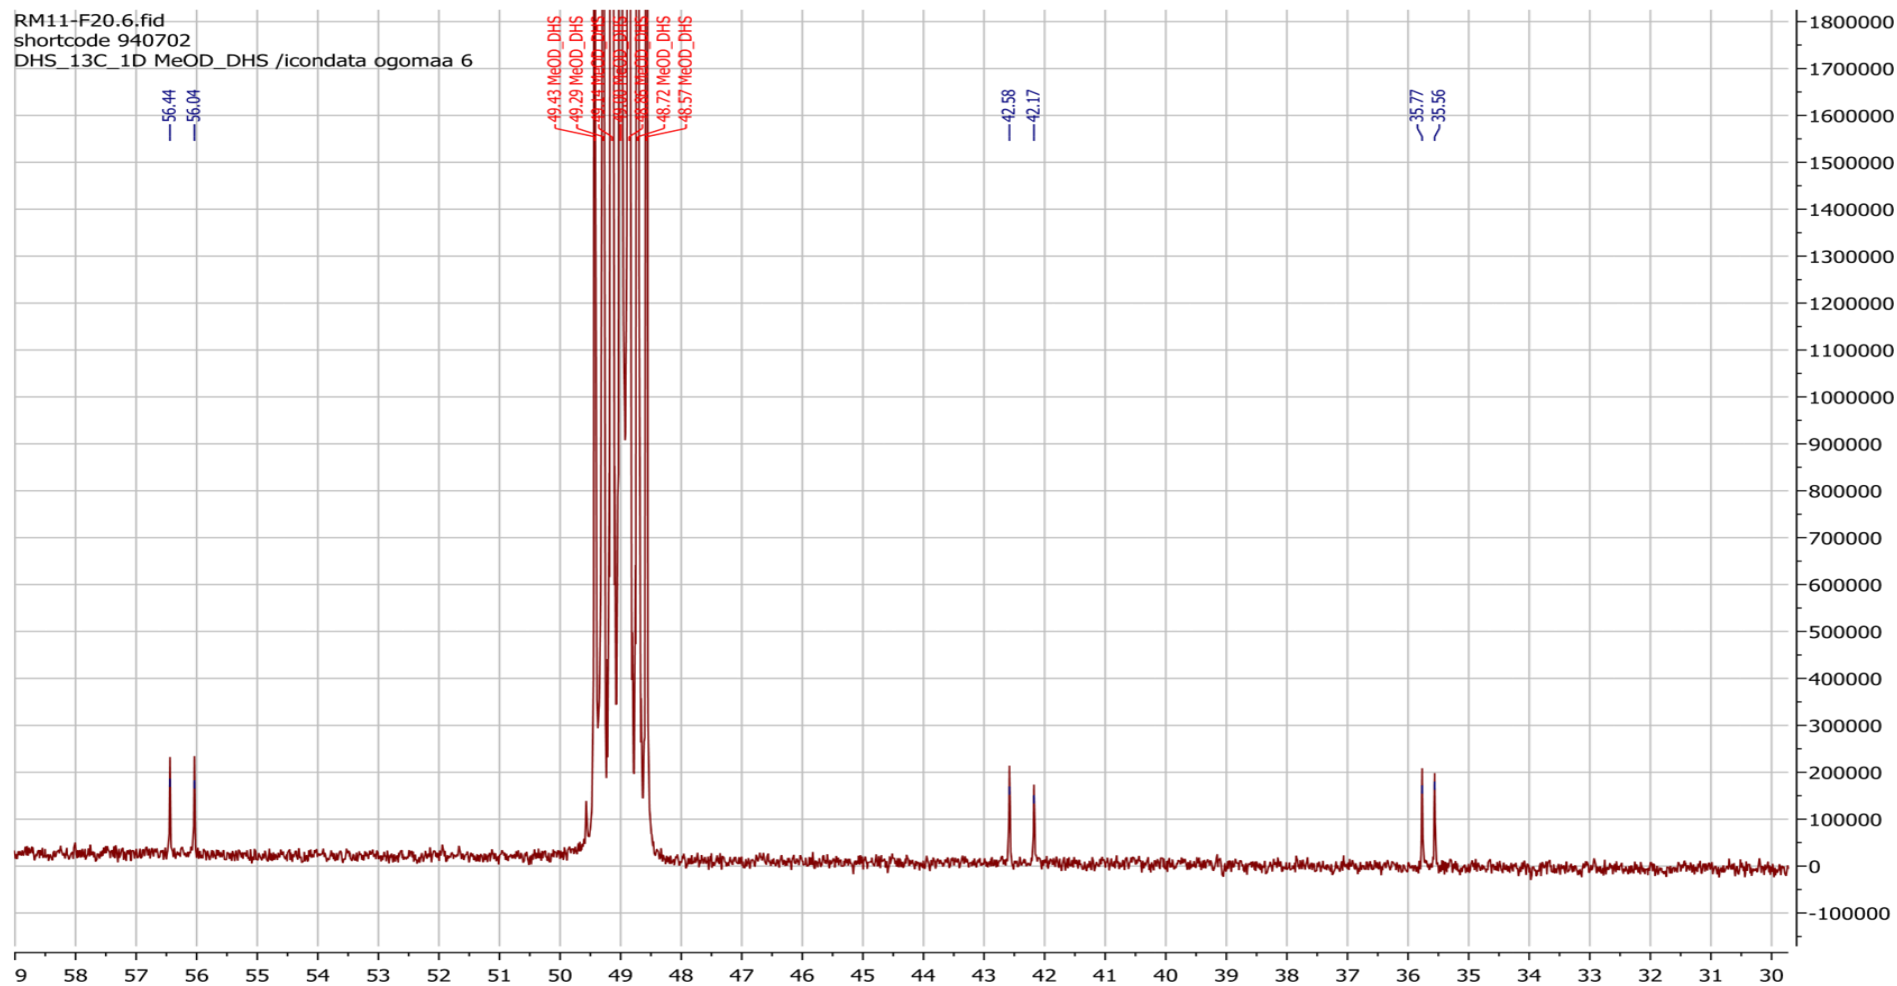

Figure. S 45 Partial expansion of  $^{13}\text{C}$ -NMR spectrum of compound 5 (150 MHz,  $\text{CD}_3\text{OD}$ )



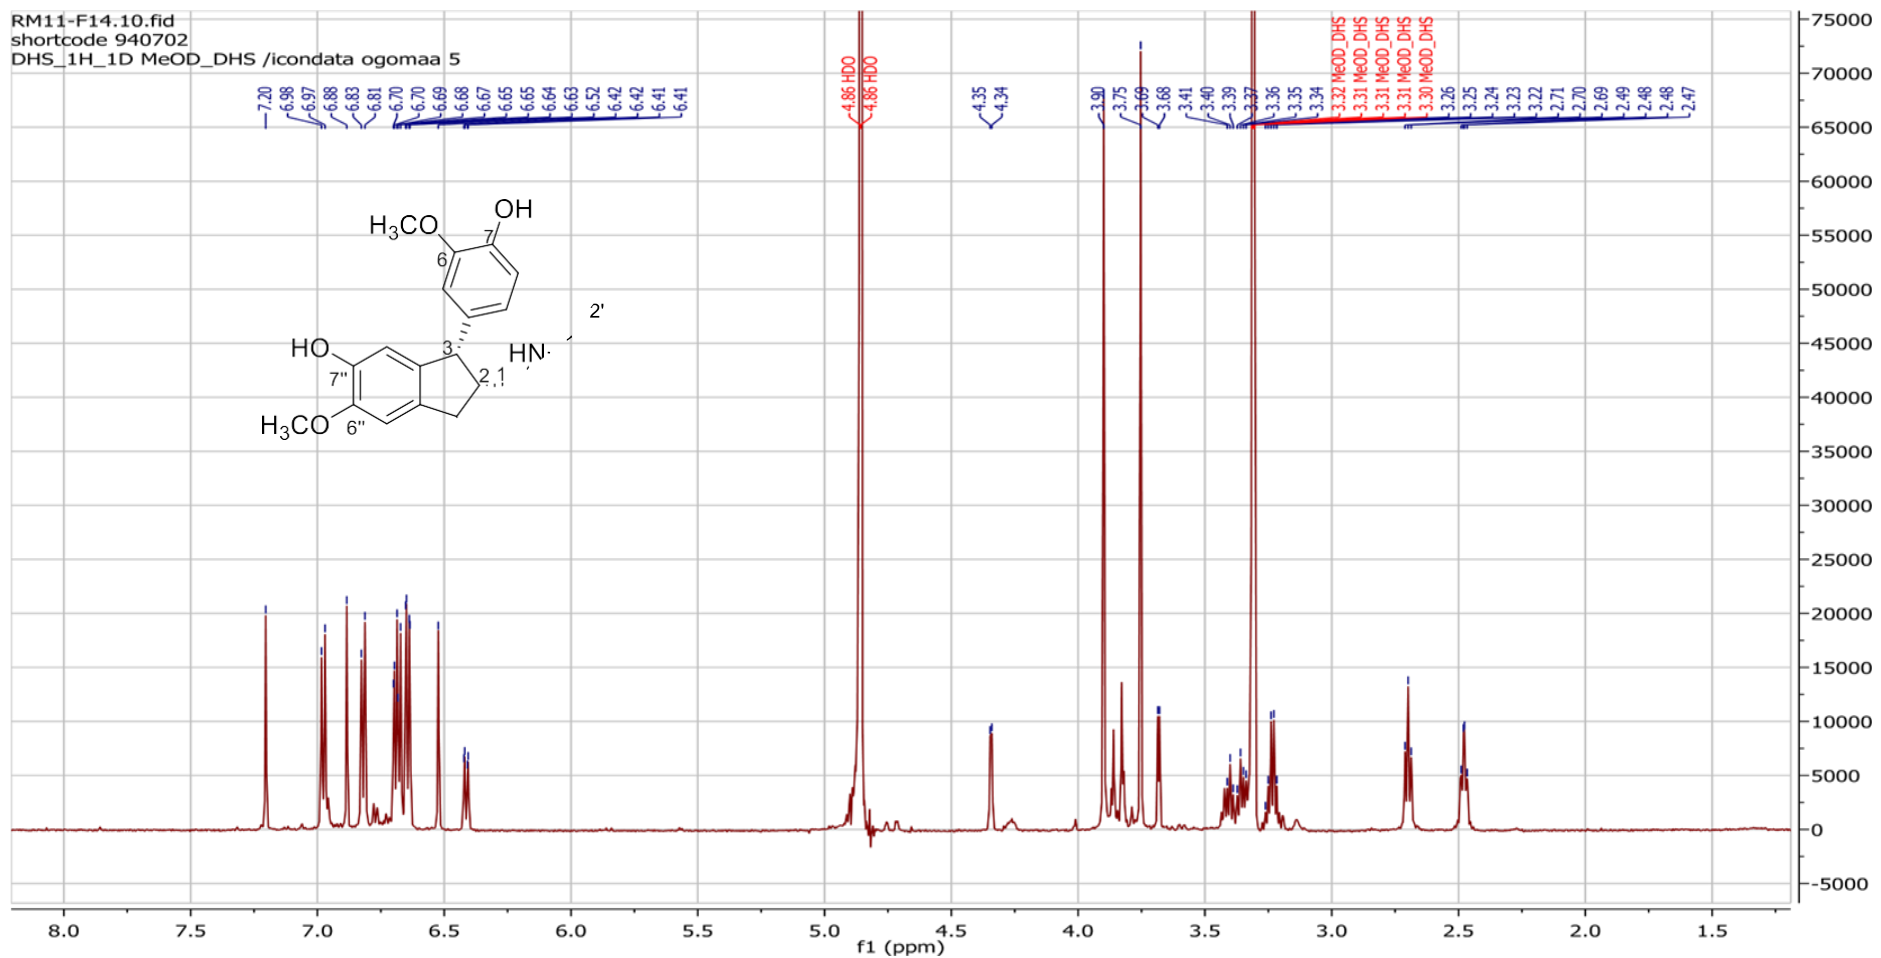

Figure. S 46  $^1\text{H}$ -NMR spectrum of compound 6 (600 MHz,  $\text{CD}_3\text{OD}$ )

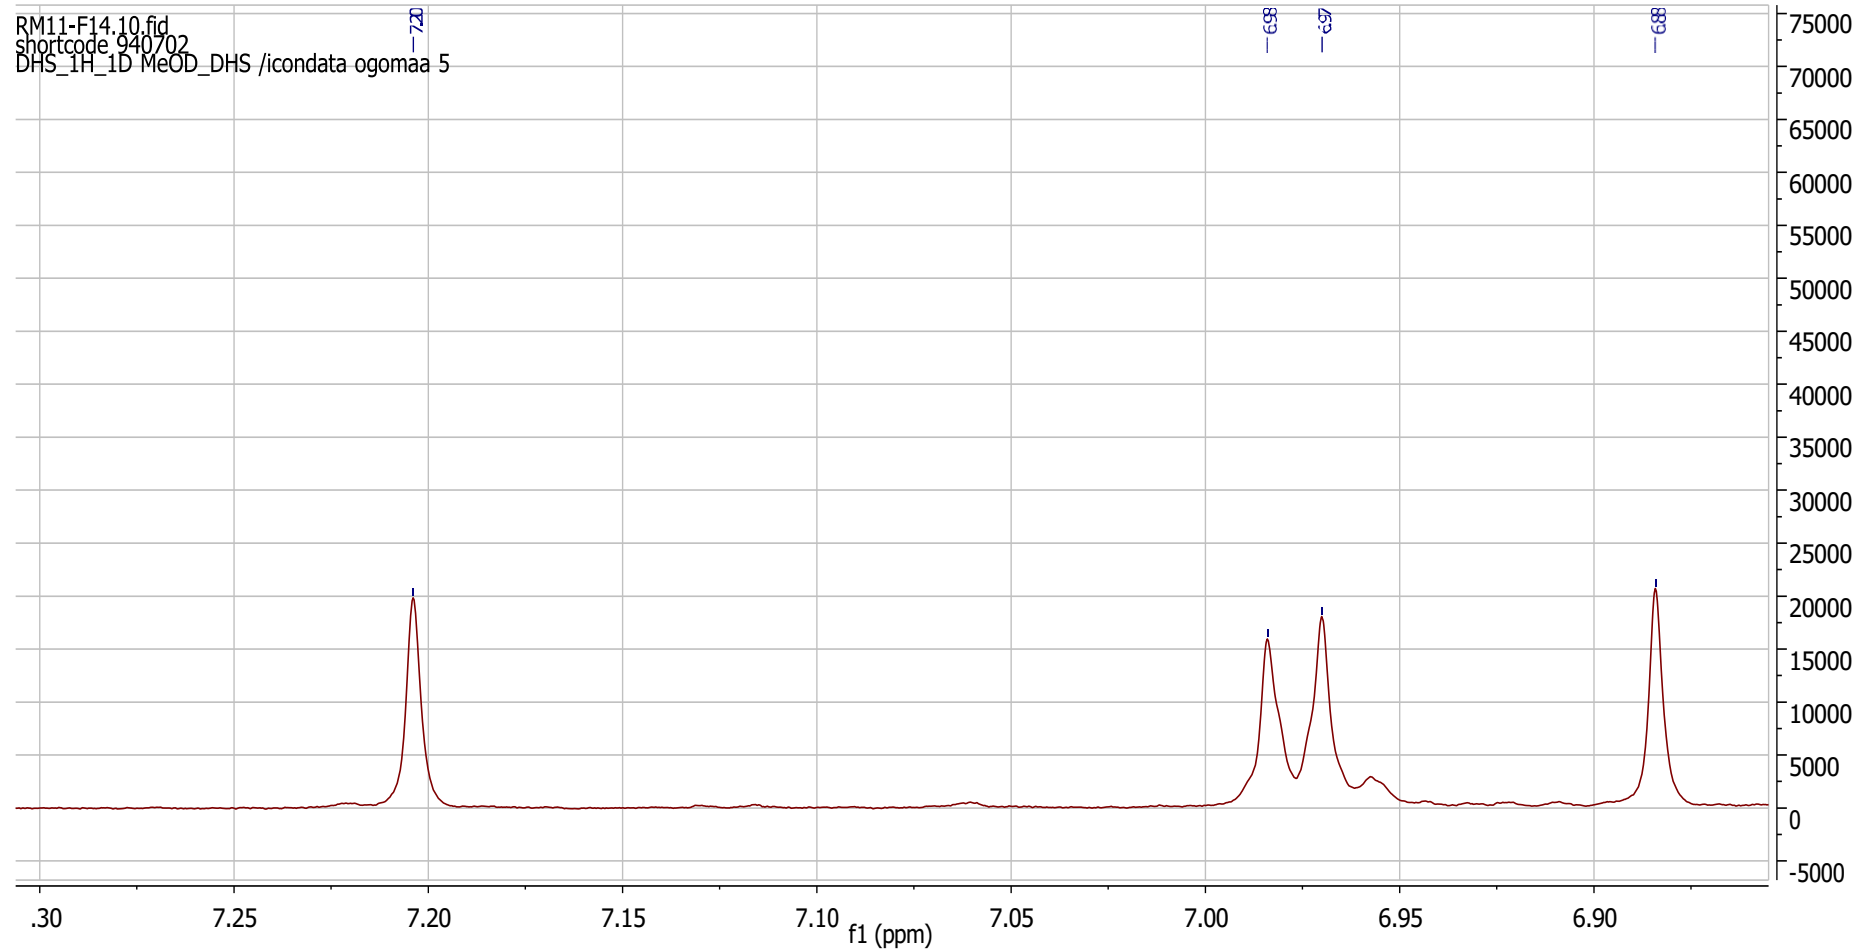

**Figure. S 47 Partial expansion of  $^1\text{H}$ -NMR spectrum of compound 6 (600 MHz,  $\text{CD}_3\text{OD}$ )**

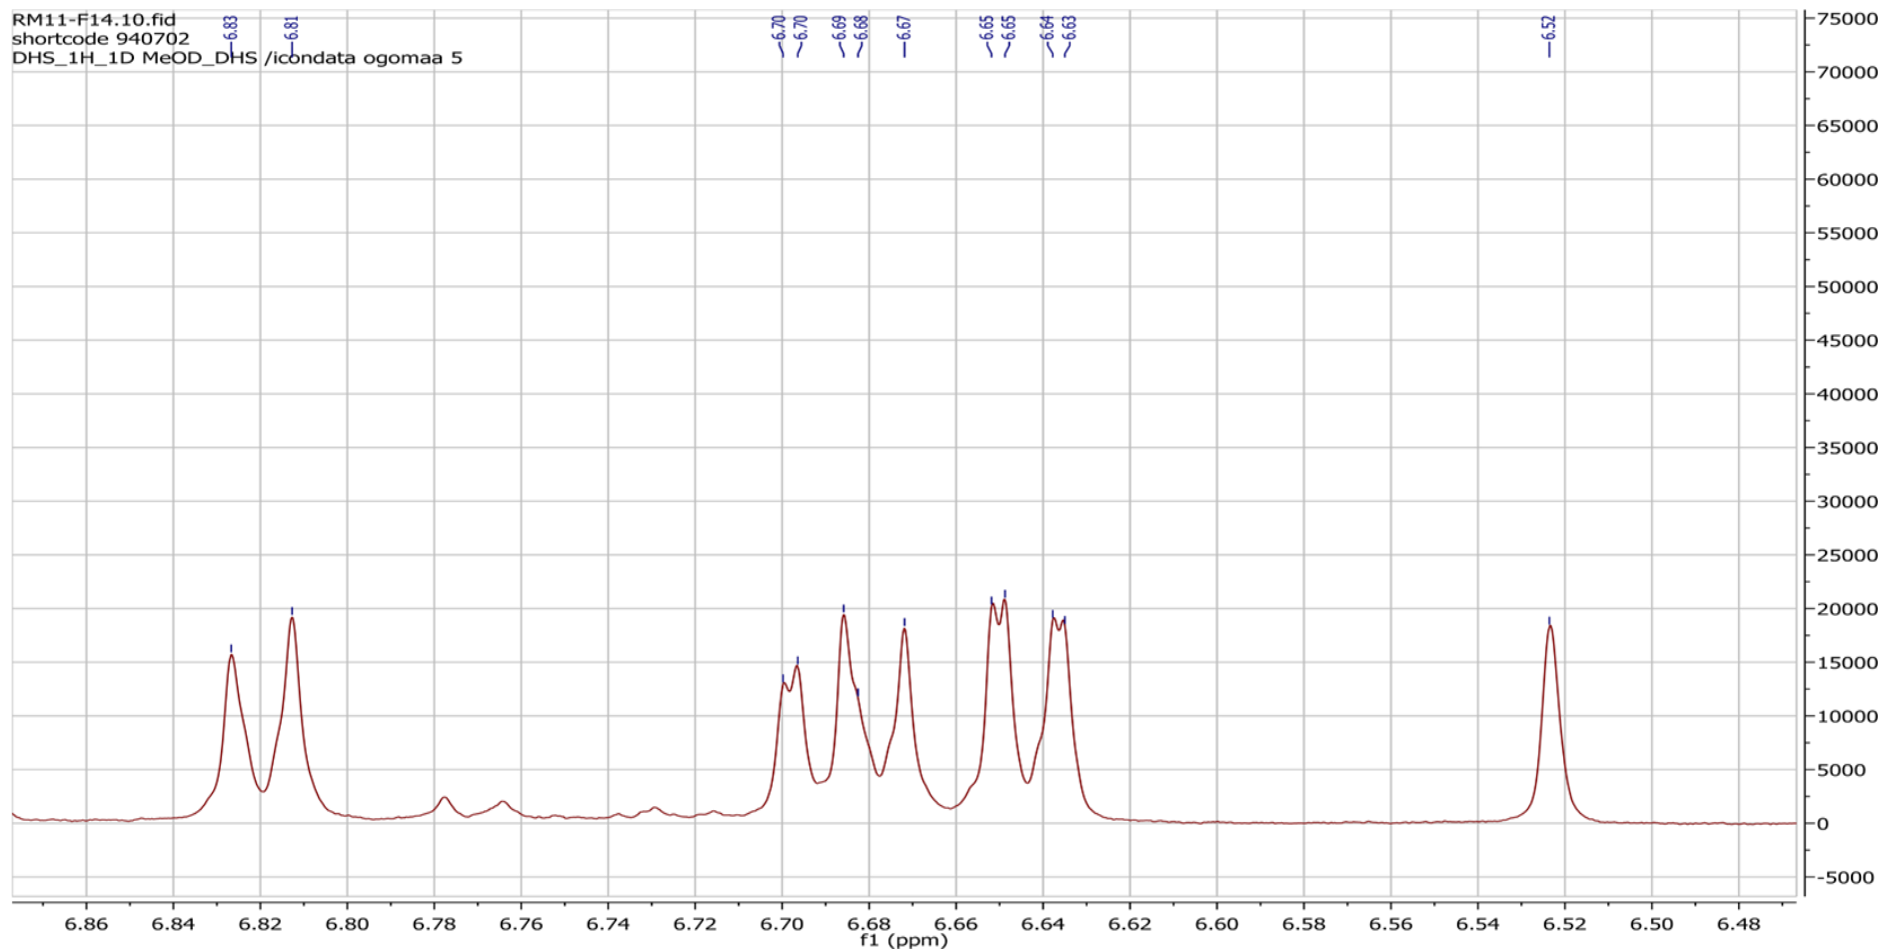

**Figure. S 48** Partial expansion of <sup>1</sup>H-NMR spectrum of compound 6 (600 MHz, CD<sub>3</sub>OD)

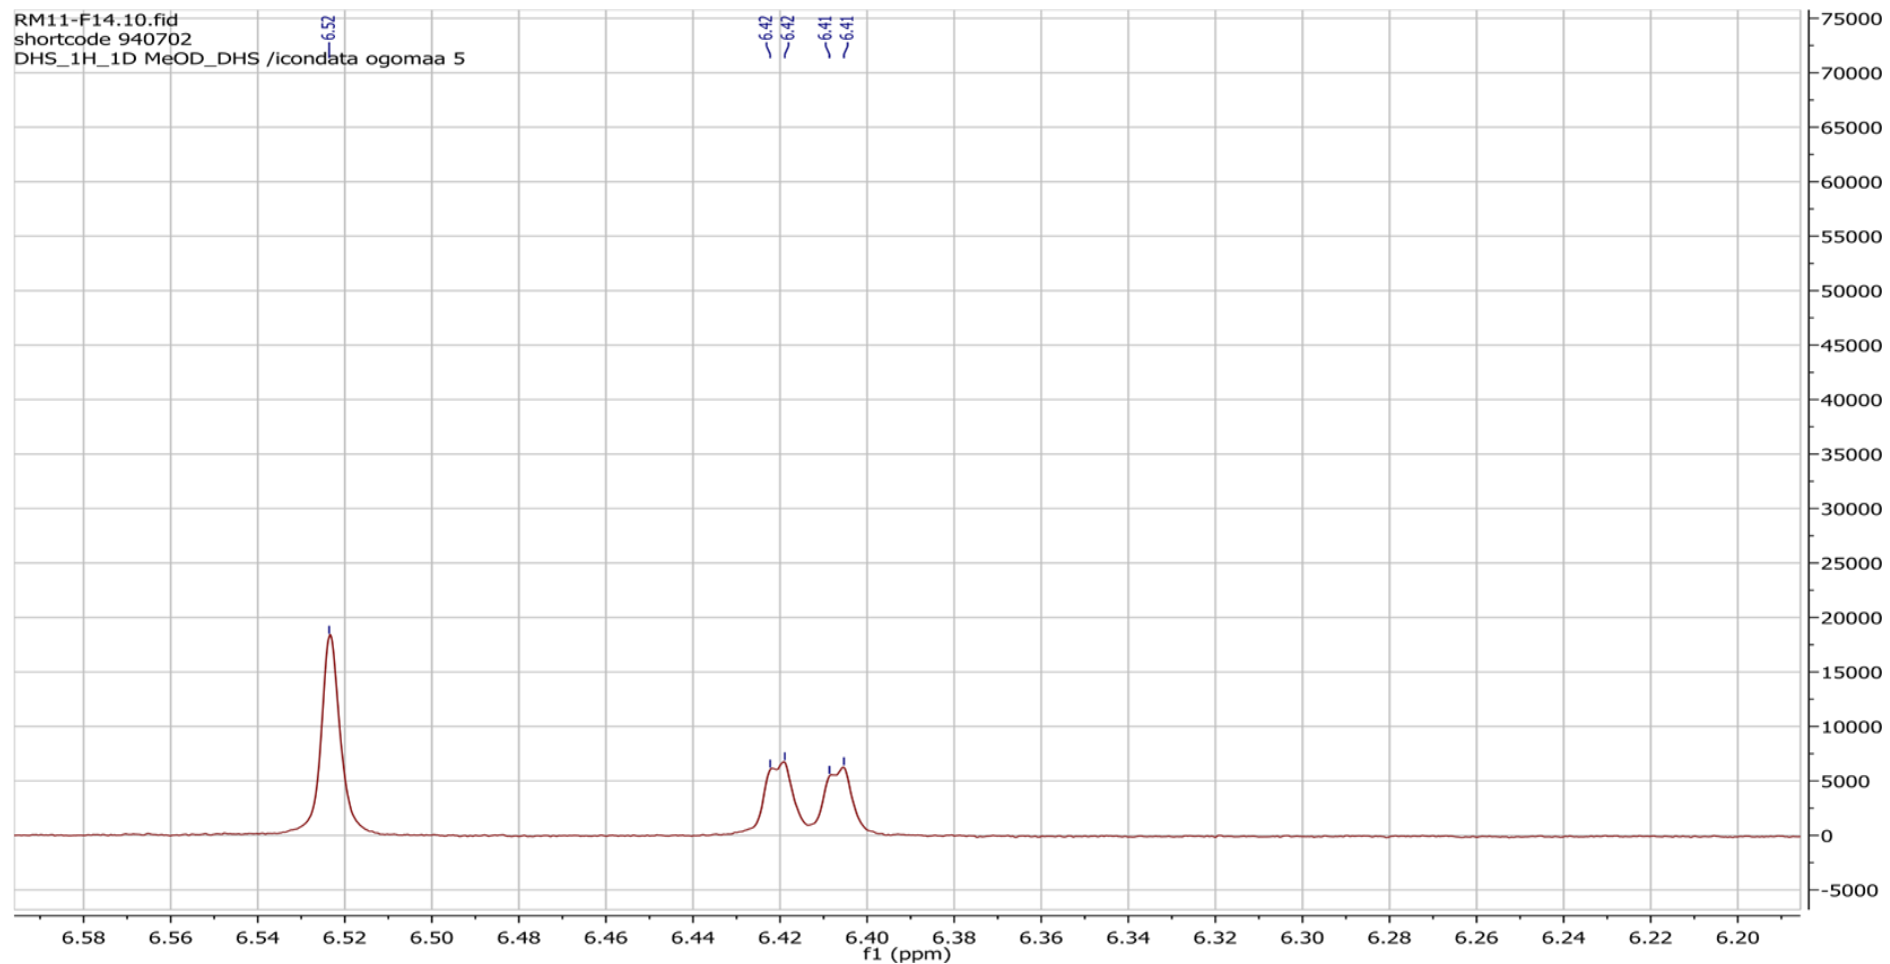

**Figure. S 49** Partial expansion of  $^1\text{H}$ -NMR spectrum of compound **6** (600 MHz,  $\text{CD}_3\text{OD}$ )

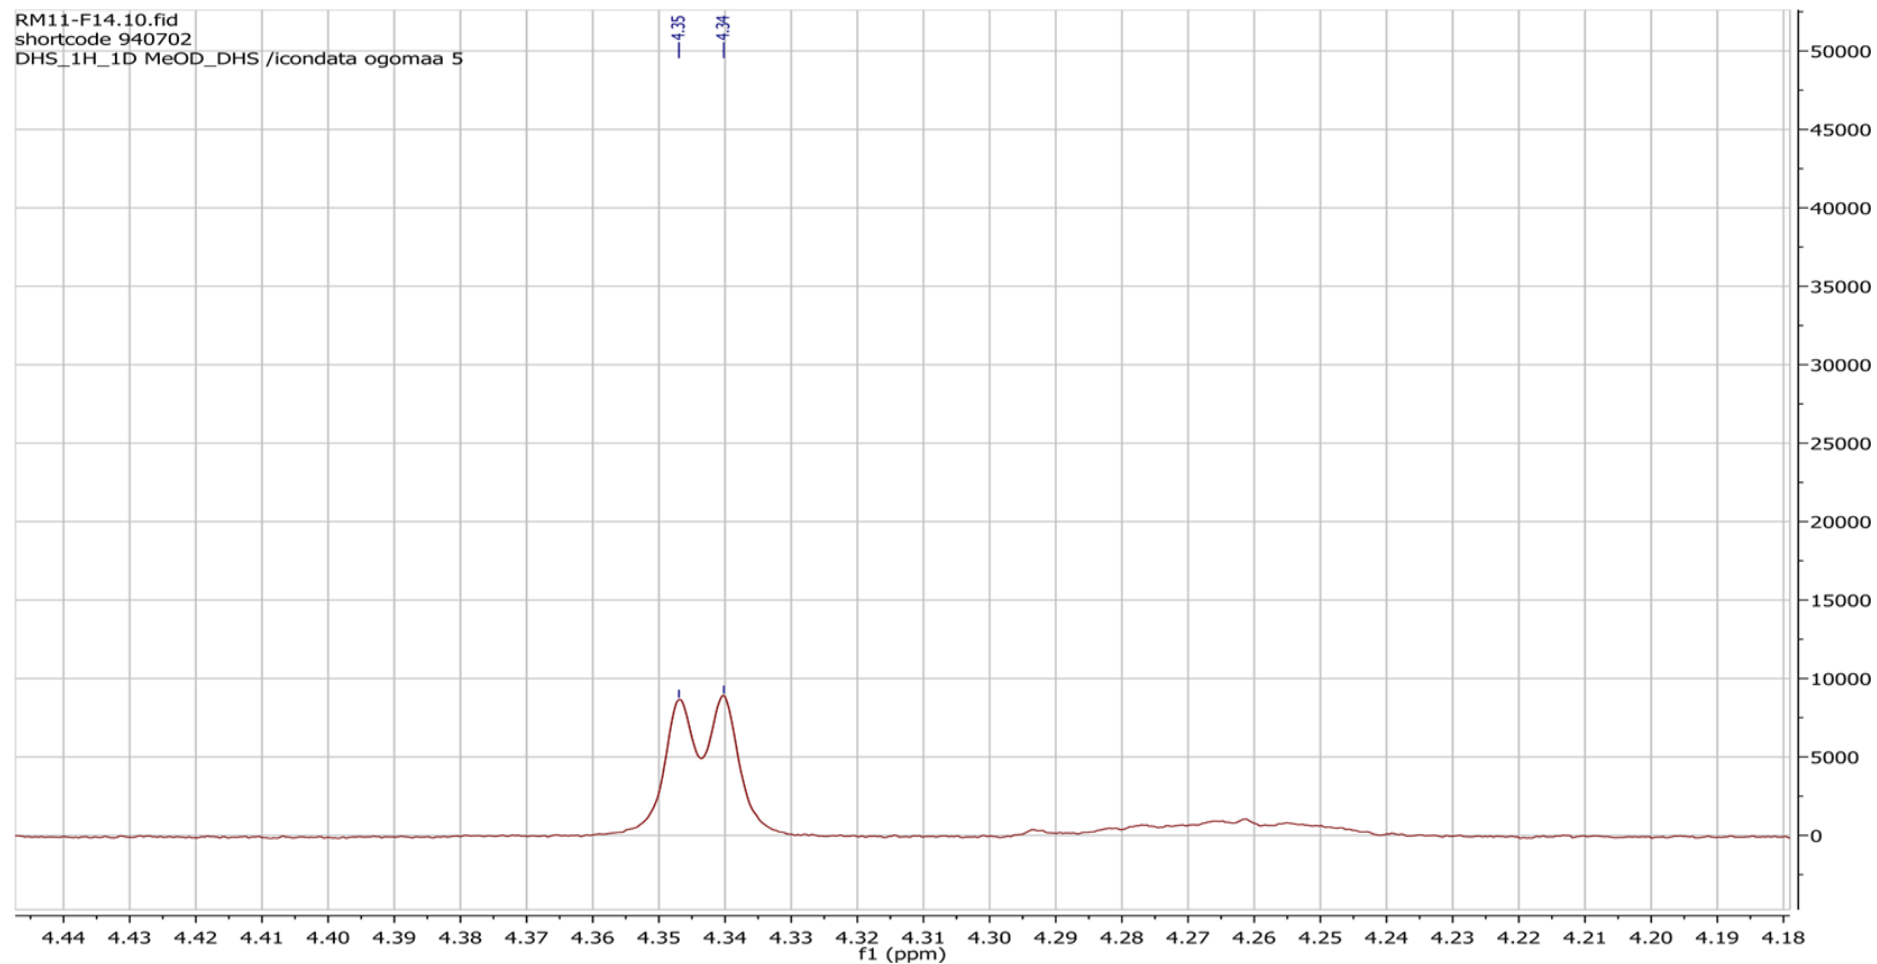

**Figure. S 50** Partial expansion of  $^1\text{H}$ -NMR spectrum of compound 6 (600 MHz,  $\text{CD}_3\text{OD}$ )

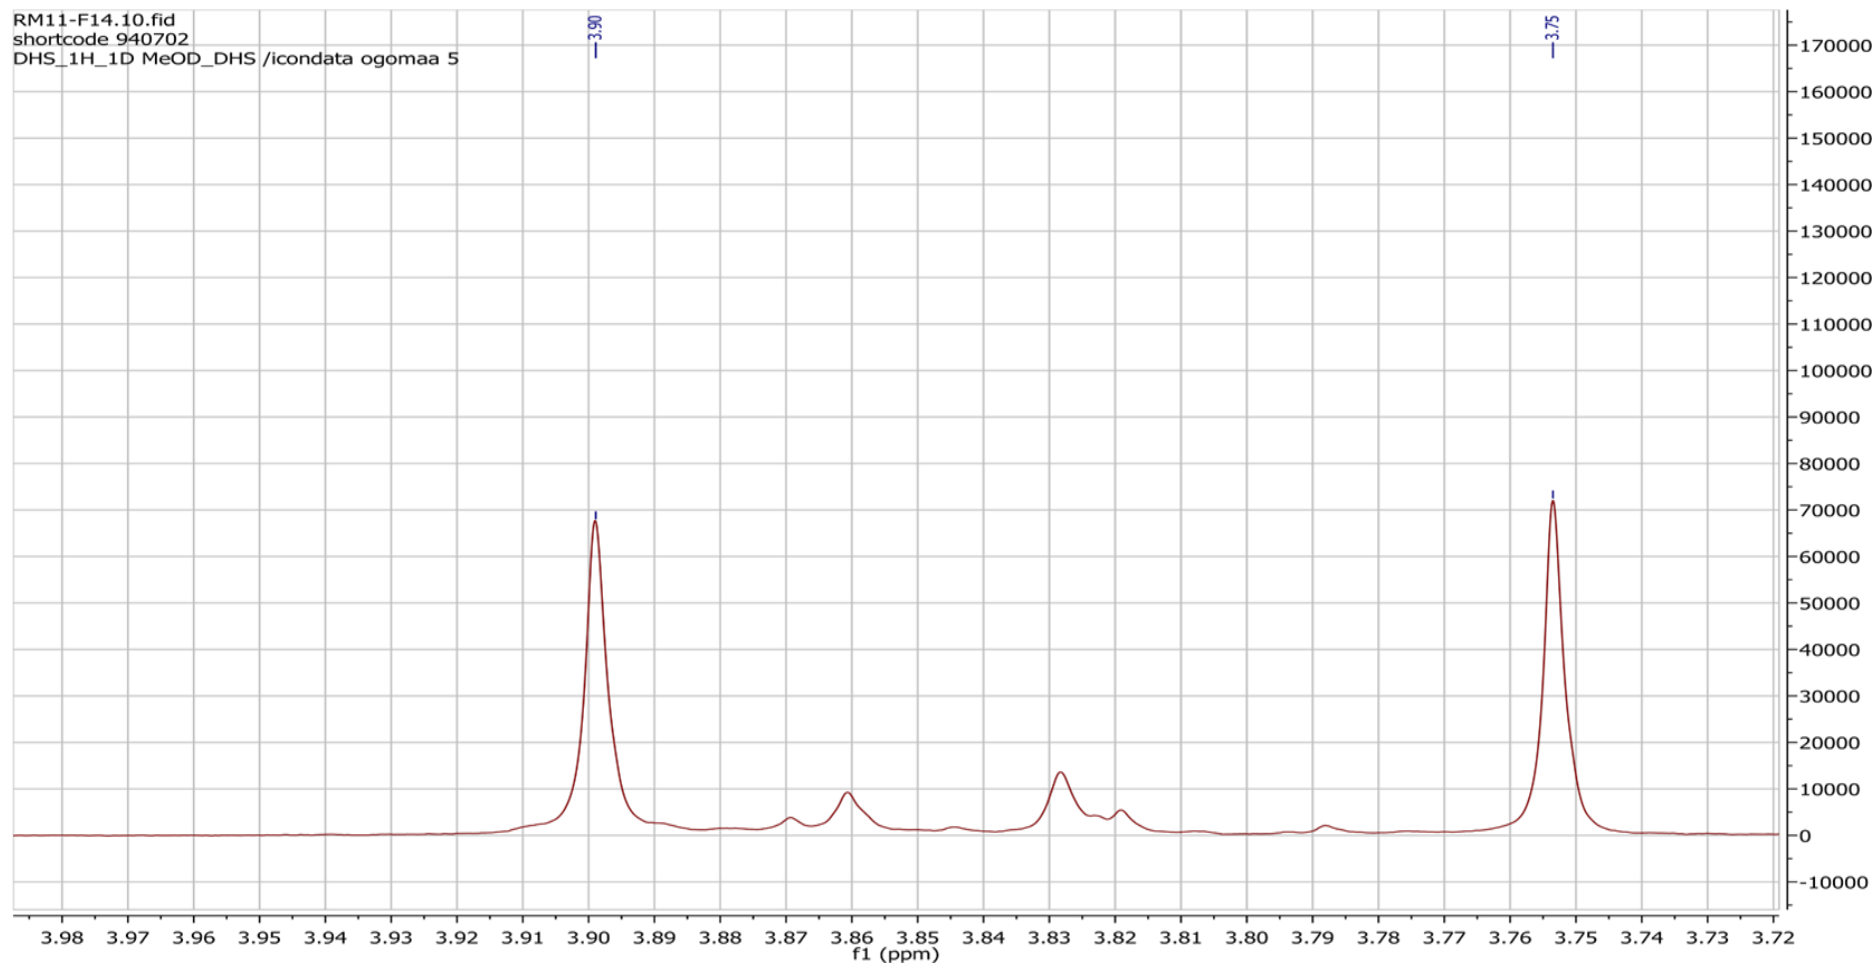

**Figure. S 51** Partial expansion of <sup>1</sup>H-NMR spectrum of compound 6 (600 MHz, CD<sub>3</sub>OD)

RM11-F14.10.fid  
shortcode 940702  
DHS\_1H\_1D MeOD\_DHS /icondata ogomaa 5

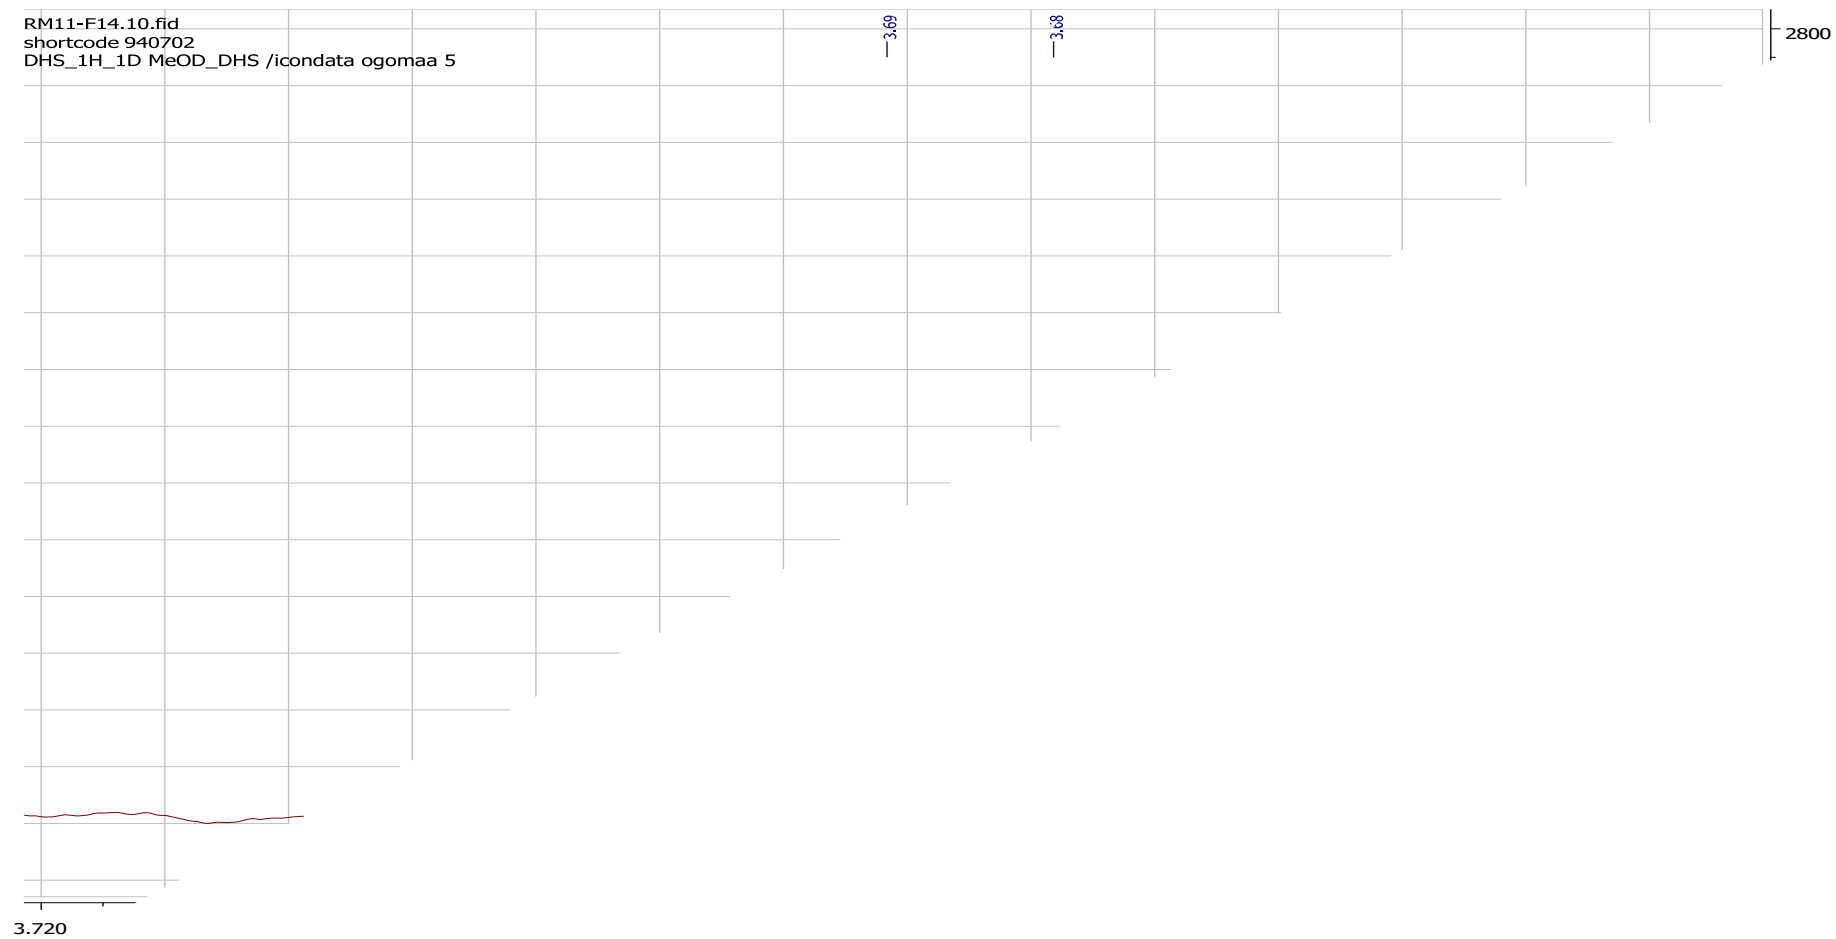

**Figure. S 52** Partial expansion of  $^1\text{H}$ -NMR spectrum of compound **6** (600 MHz,  $\text{CD}_3\text{OD}$ )

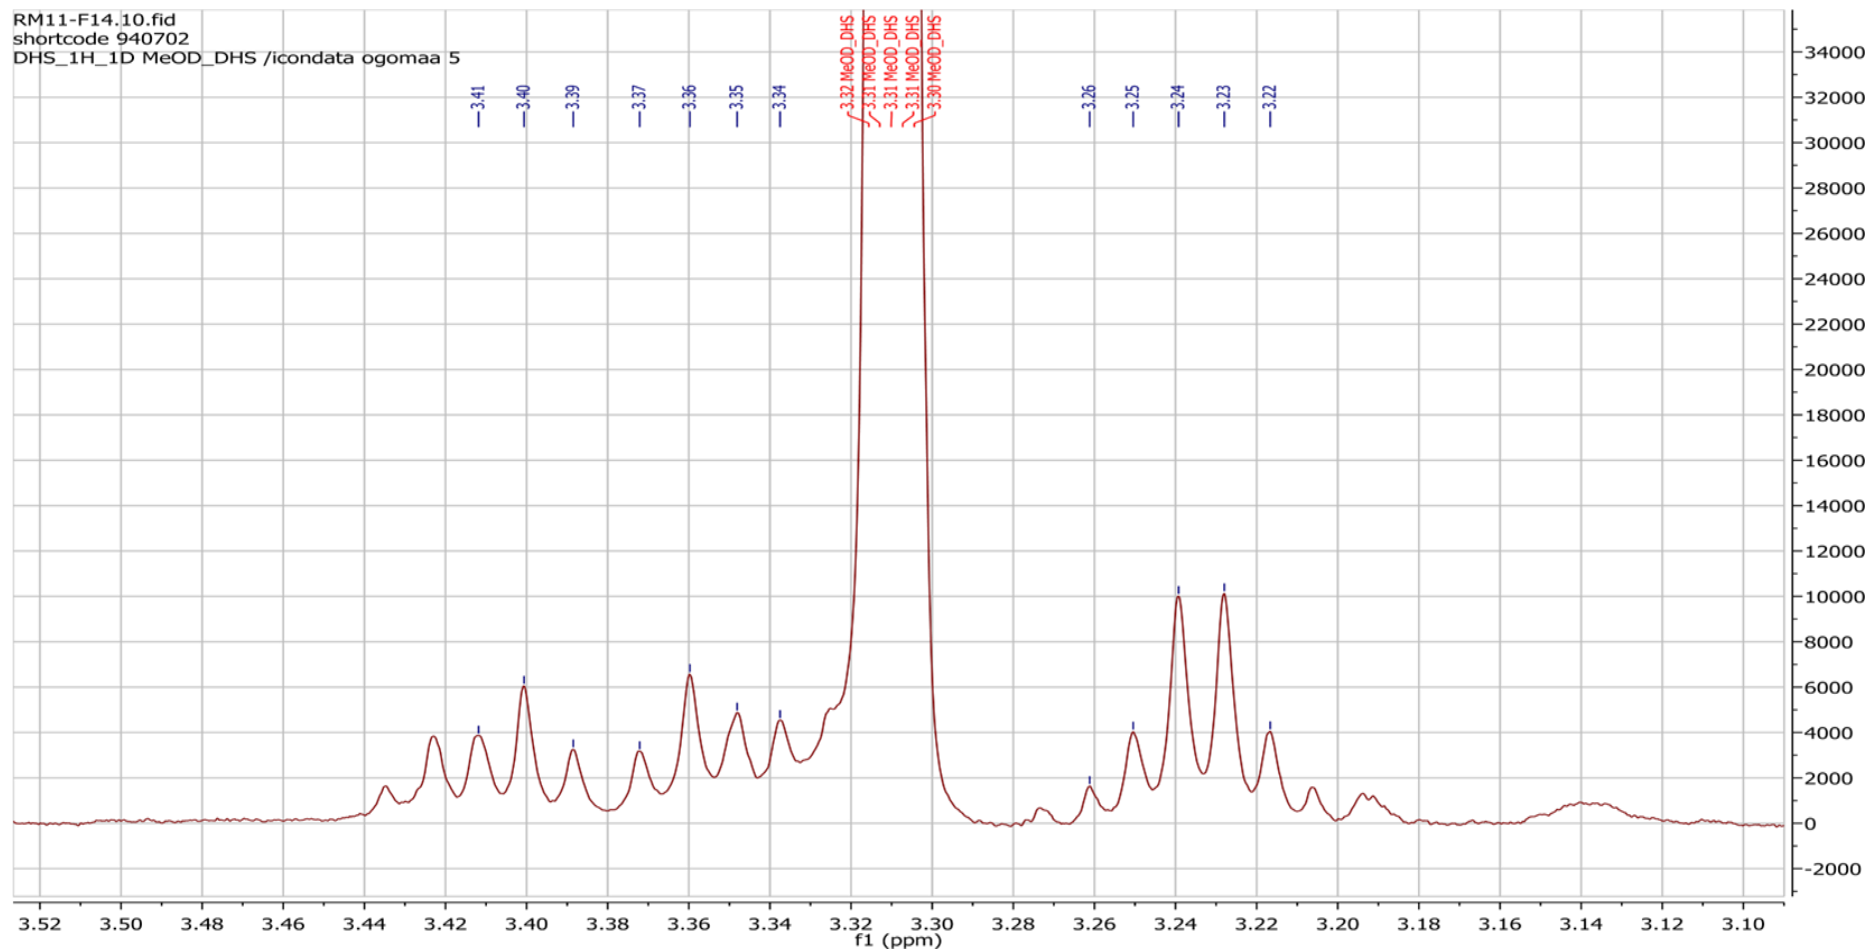

**Figure. S 53** Partial expansion of  $^1\text{H}$ -NMR spectrum of compound **6** (600 MHz,  $\text{CD}_3\text{OD}$ )



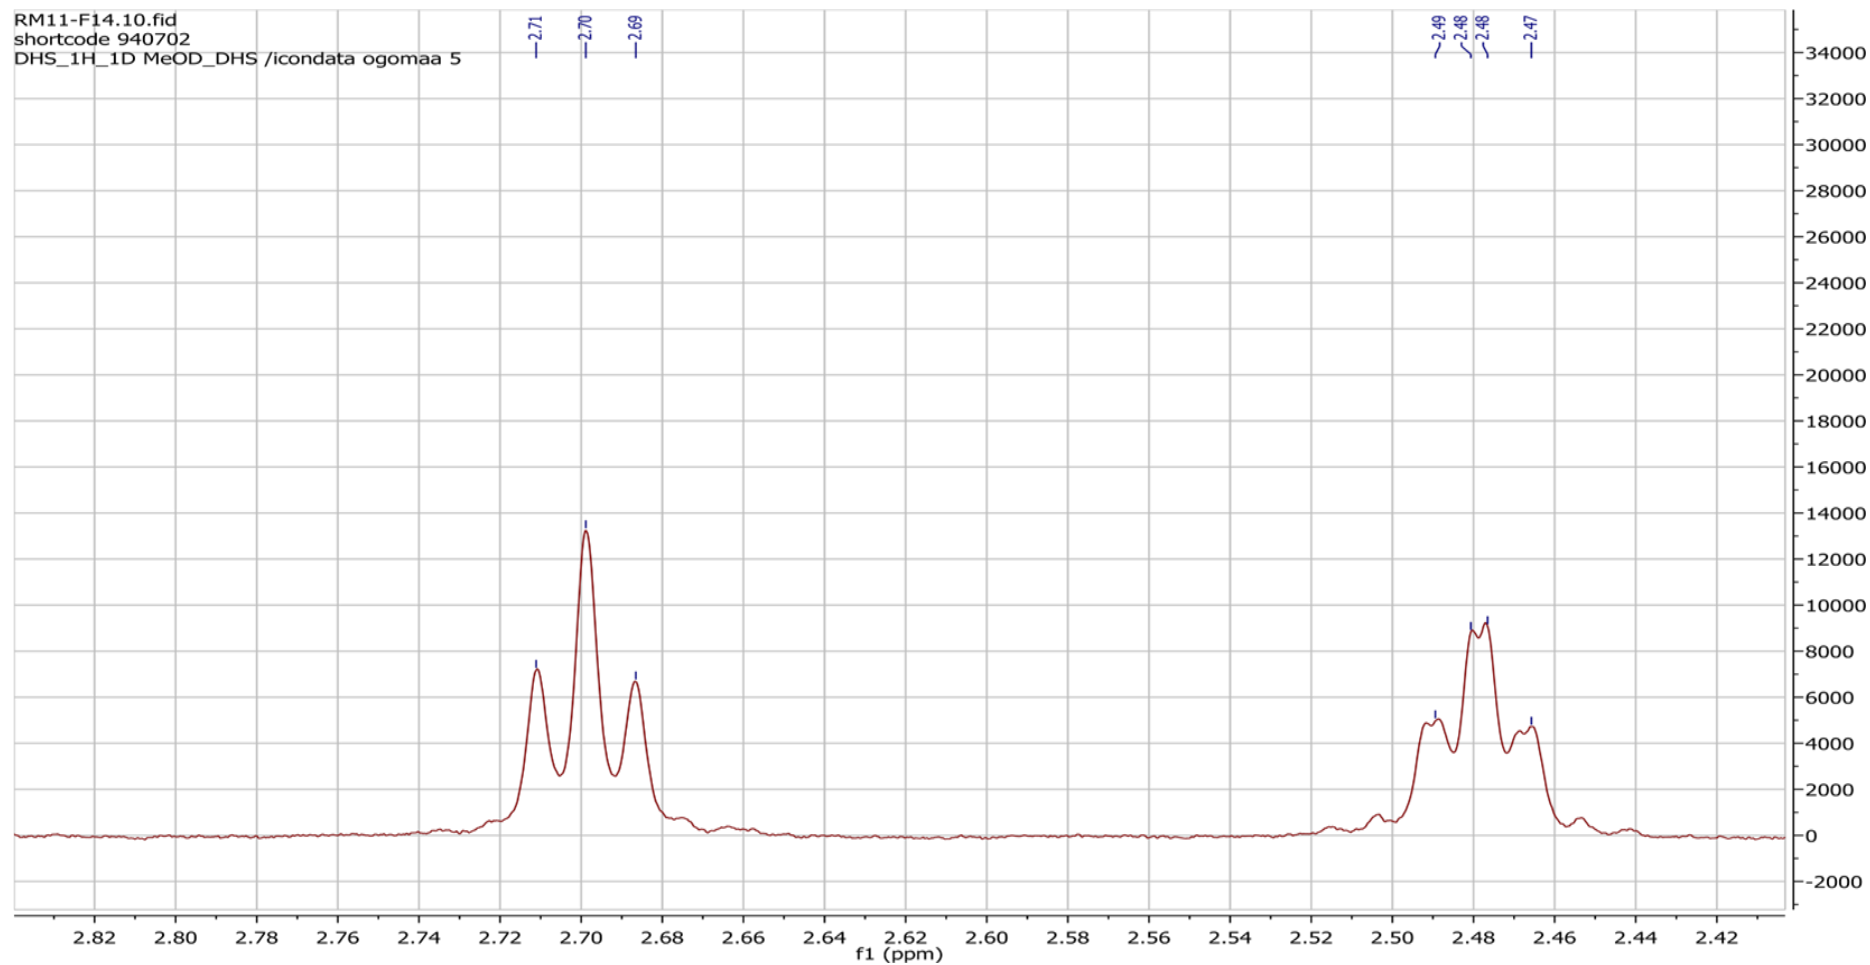

**Figure. S 54** Partial expansion of  $^1\text{H}$ -NMR spectrum of compound **6** (600 MHz,  $\text{CD}_3\text{OD}$ )

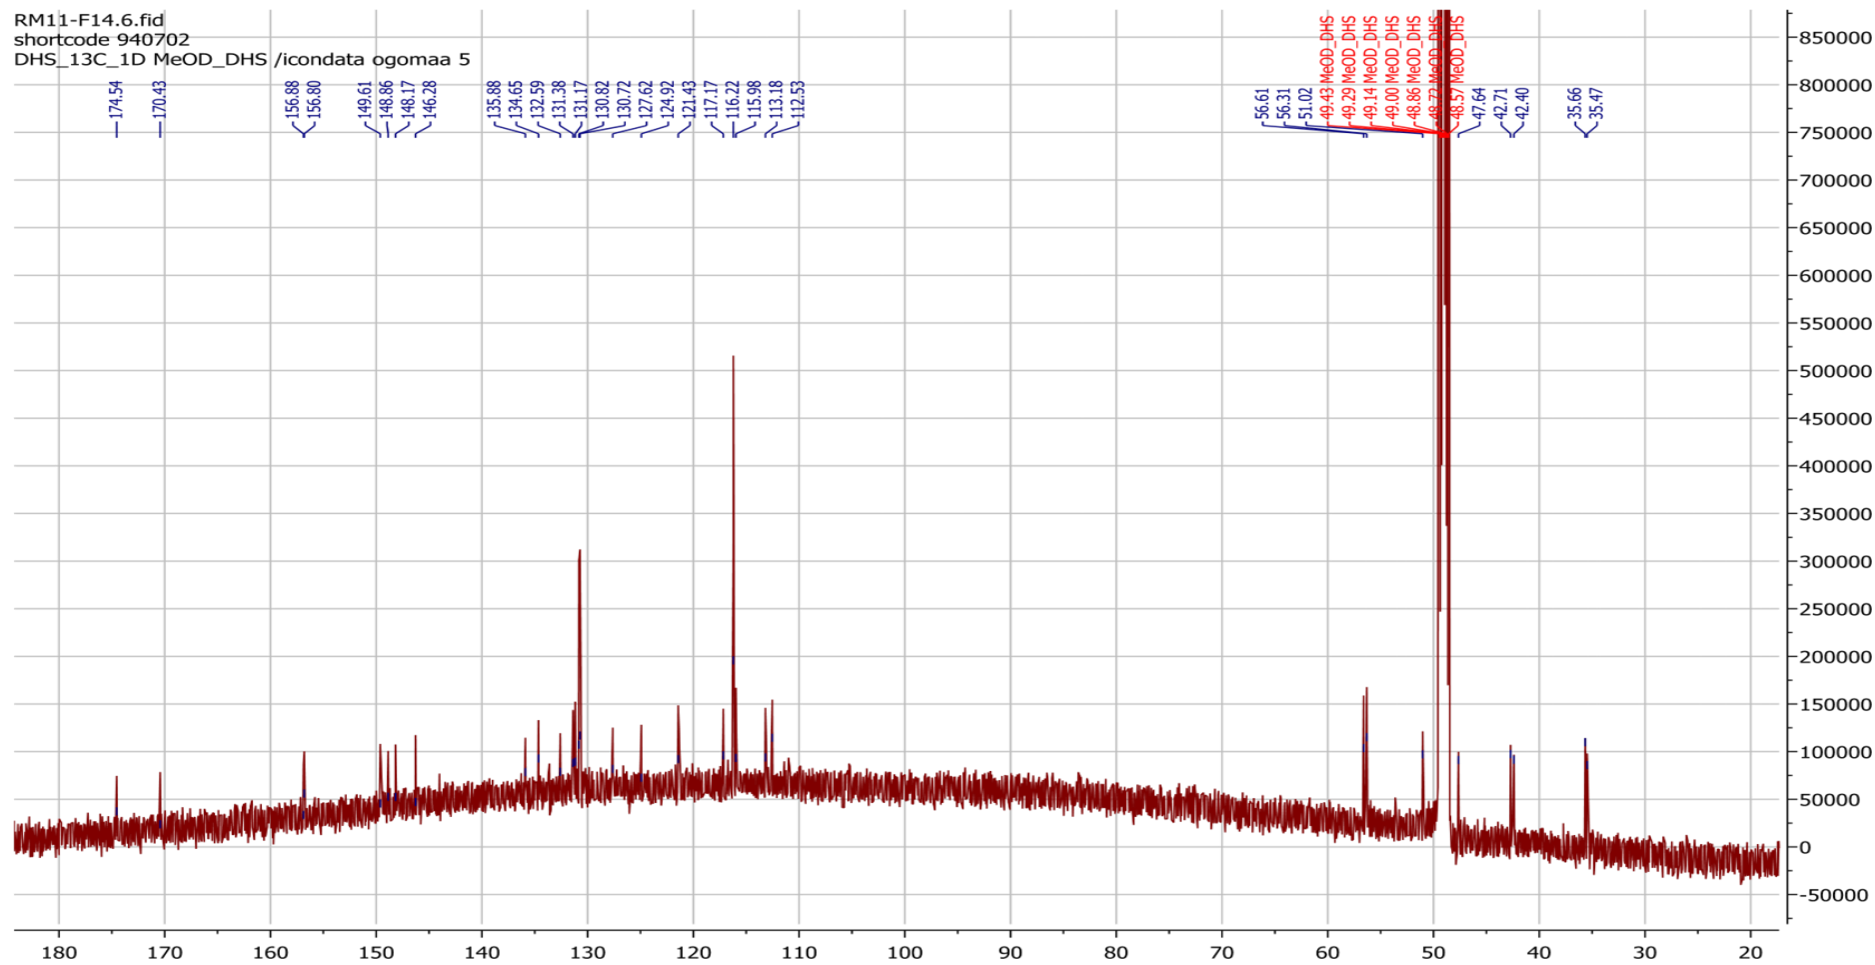

Figure. S 55  $^{13}\text{C}$ -NMR spectrum of compound 6 (150 MHz,  $\text{CD}_3\text{OD}$ )

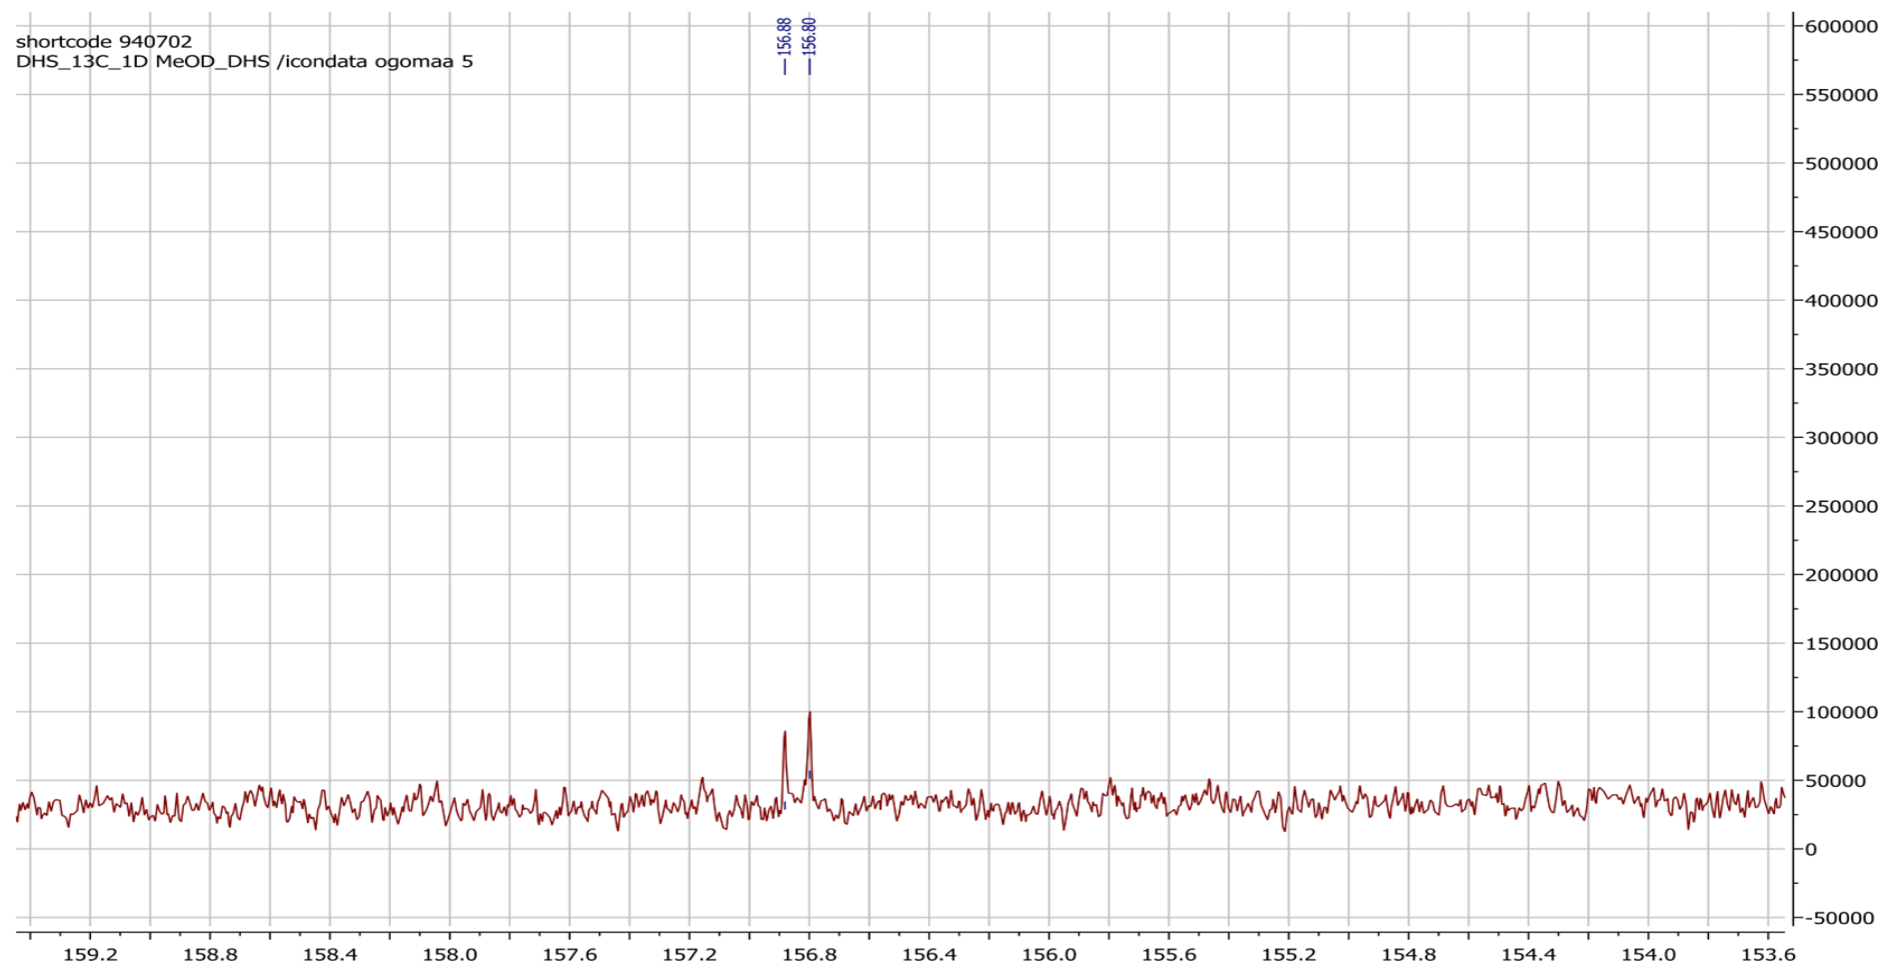

**Figure. S 56 Partial expansion of  $^{13}\text{C}$ -NMR spectrum of compound 6 (150 MHz,  $\text{CD}_3\text{OD}$ )**

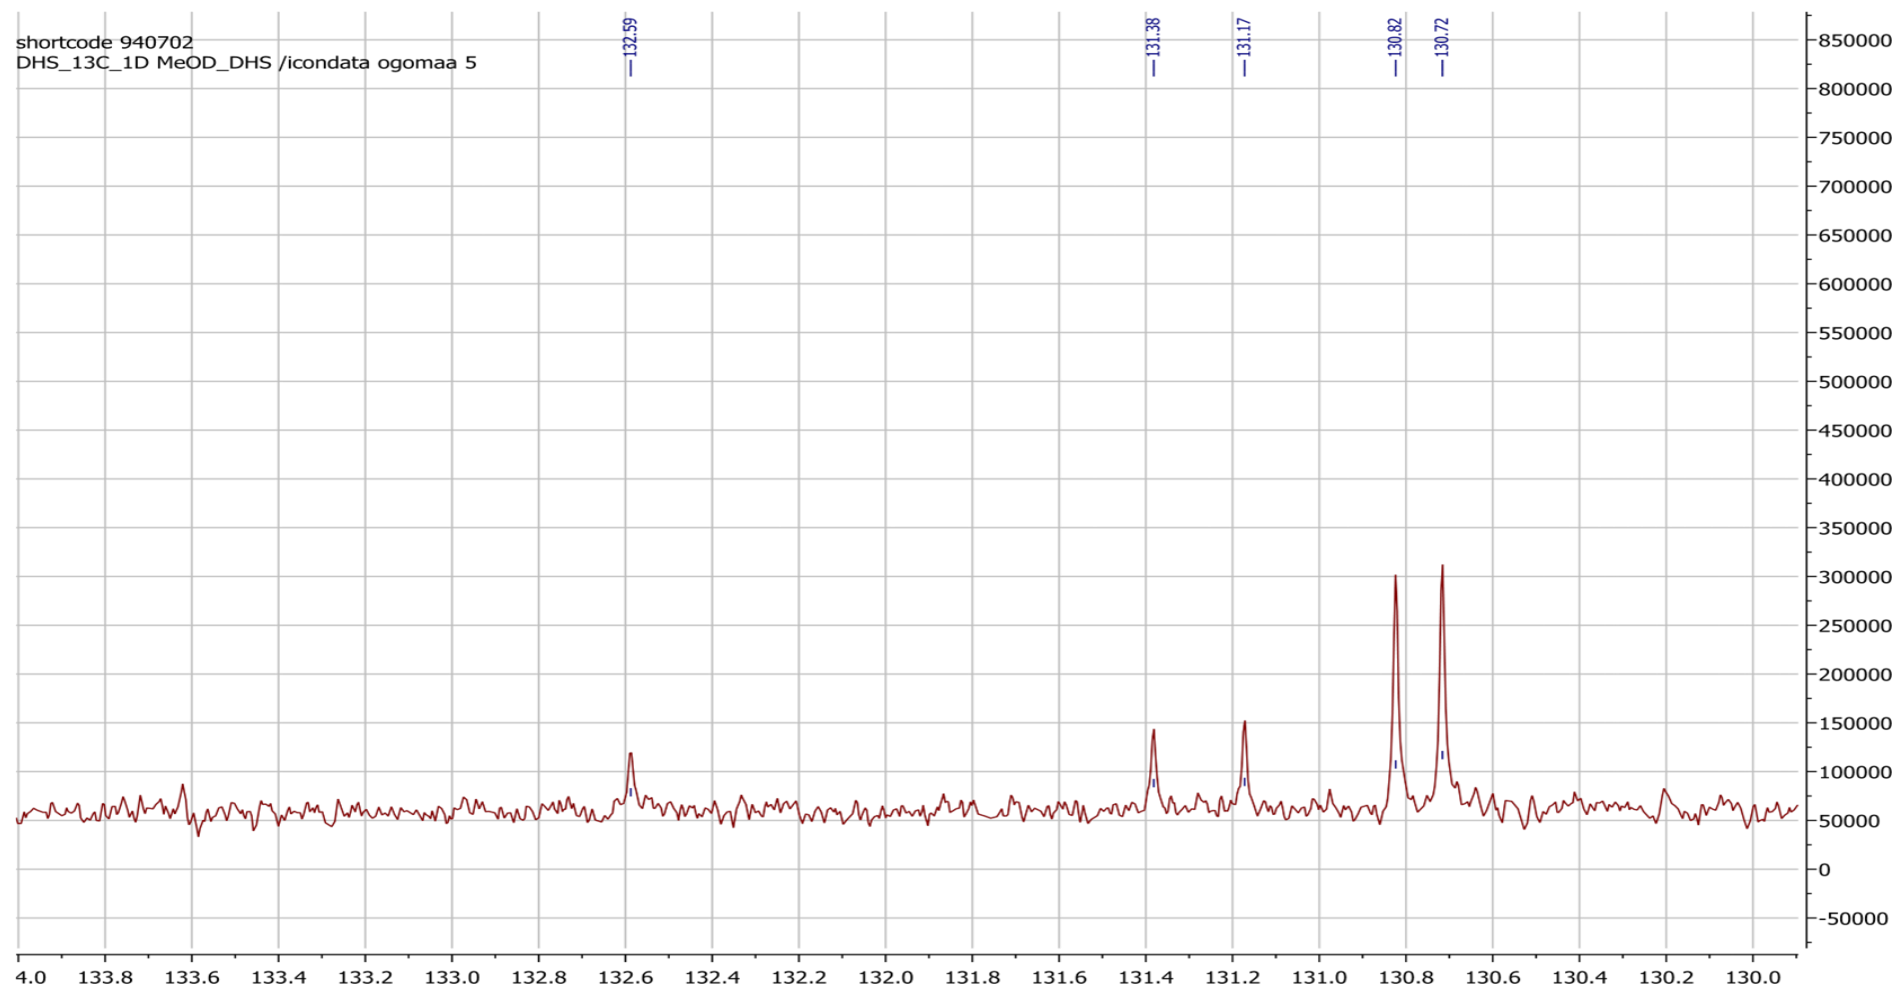

**Figure. S 57** Partial expansion of  $^{13}\text{C}$ -NMR spectrum of compound 6 (150 MHz,  $\text{CD}_3\text{OD}$ )

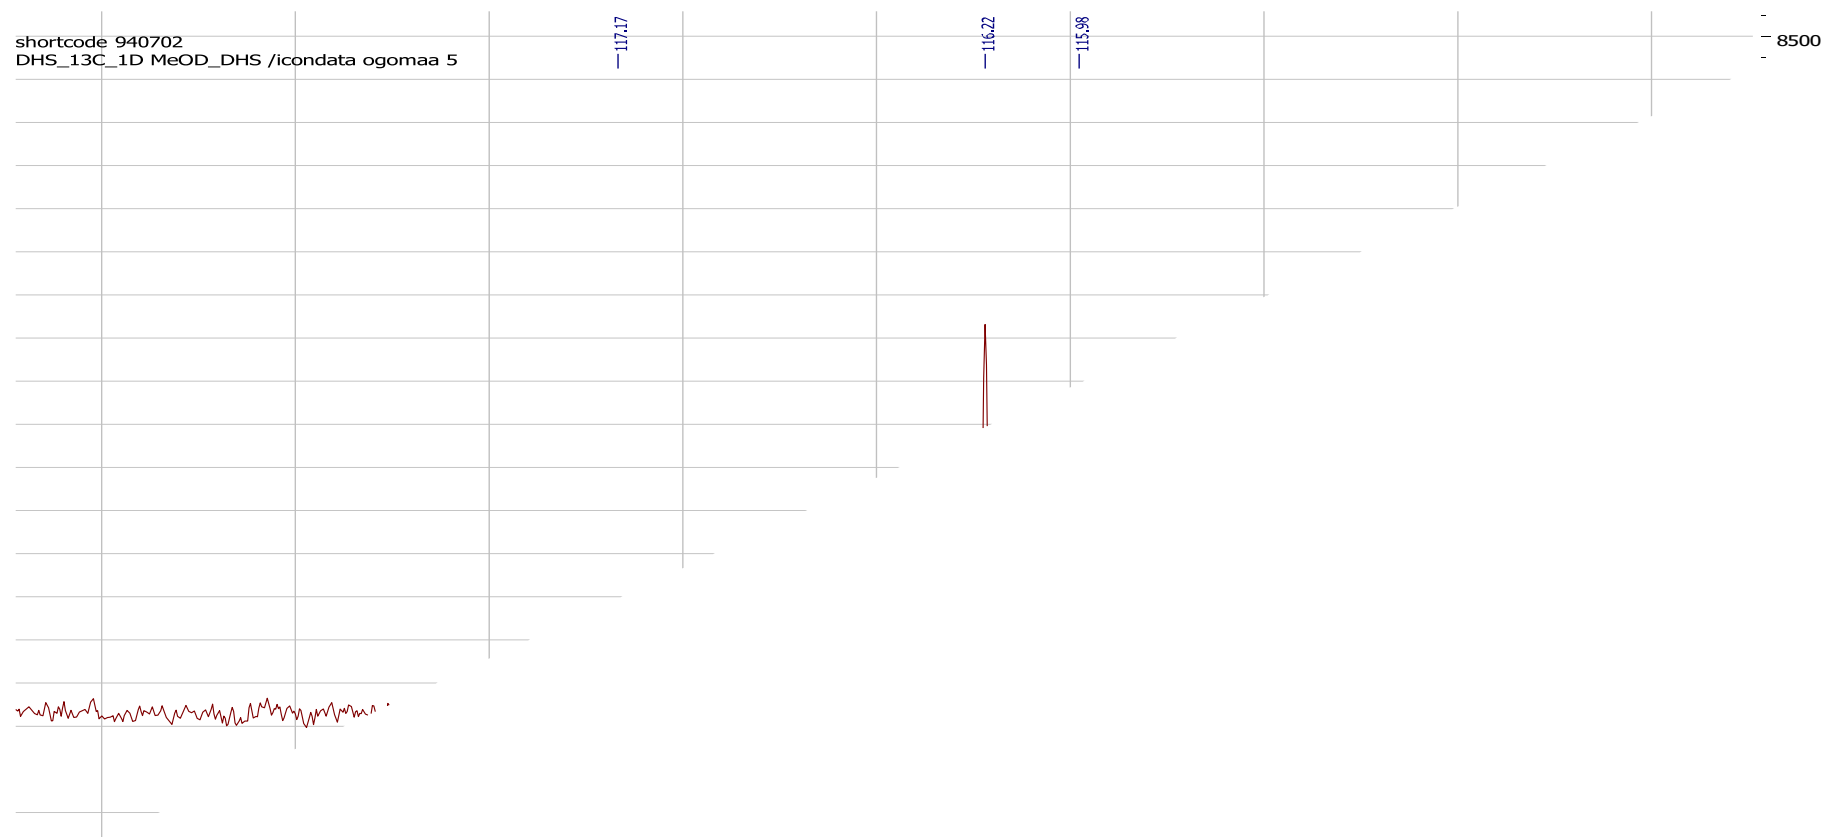

**Figure. S 58** Partial expansion of  $^{13}\text{C}$ -NMR spectrum of compound 6 (150 MHz,  $\text{CD}_3\text{OD}$ )

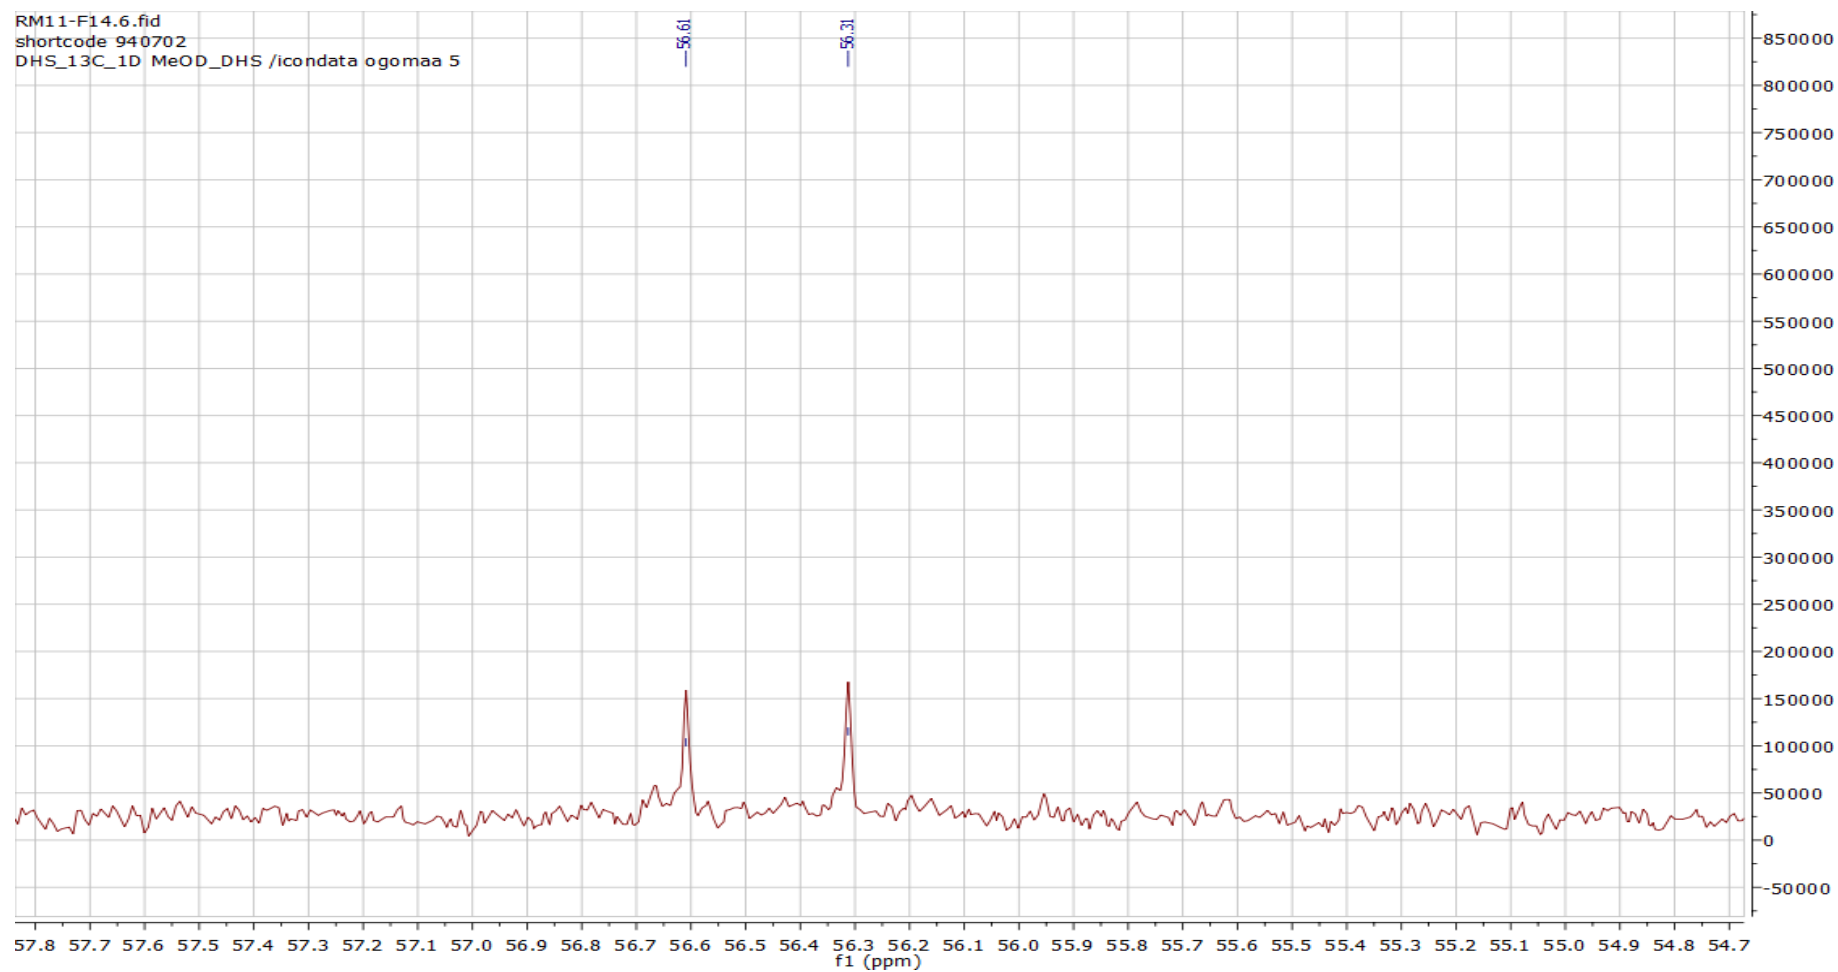

**Figure. S 59** Partial expansion of  $^{13}\text{C}$ -NMR spectrum of compound 6 (150 MHz,  $\text{CD}_3\text{OD}$ )

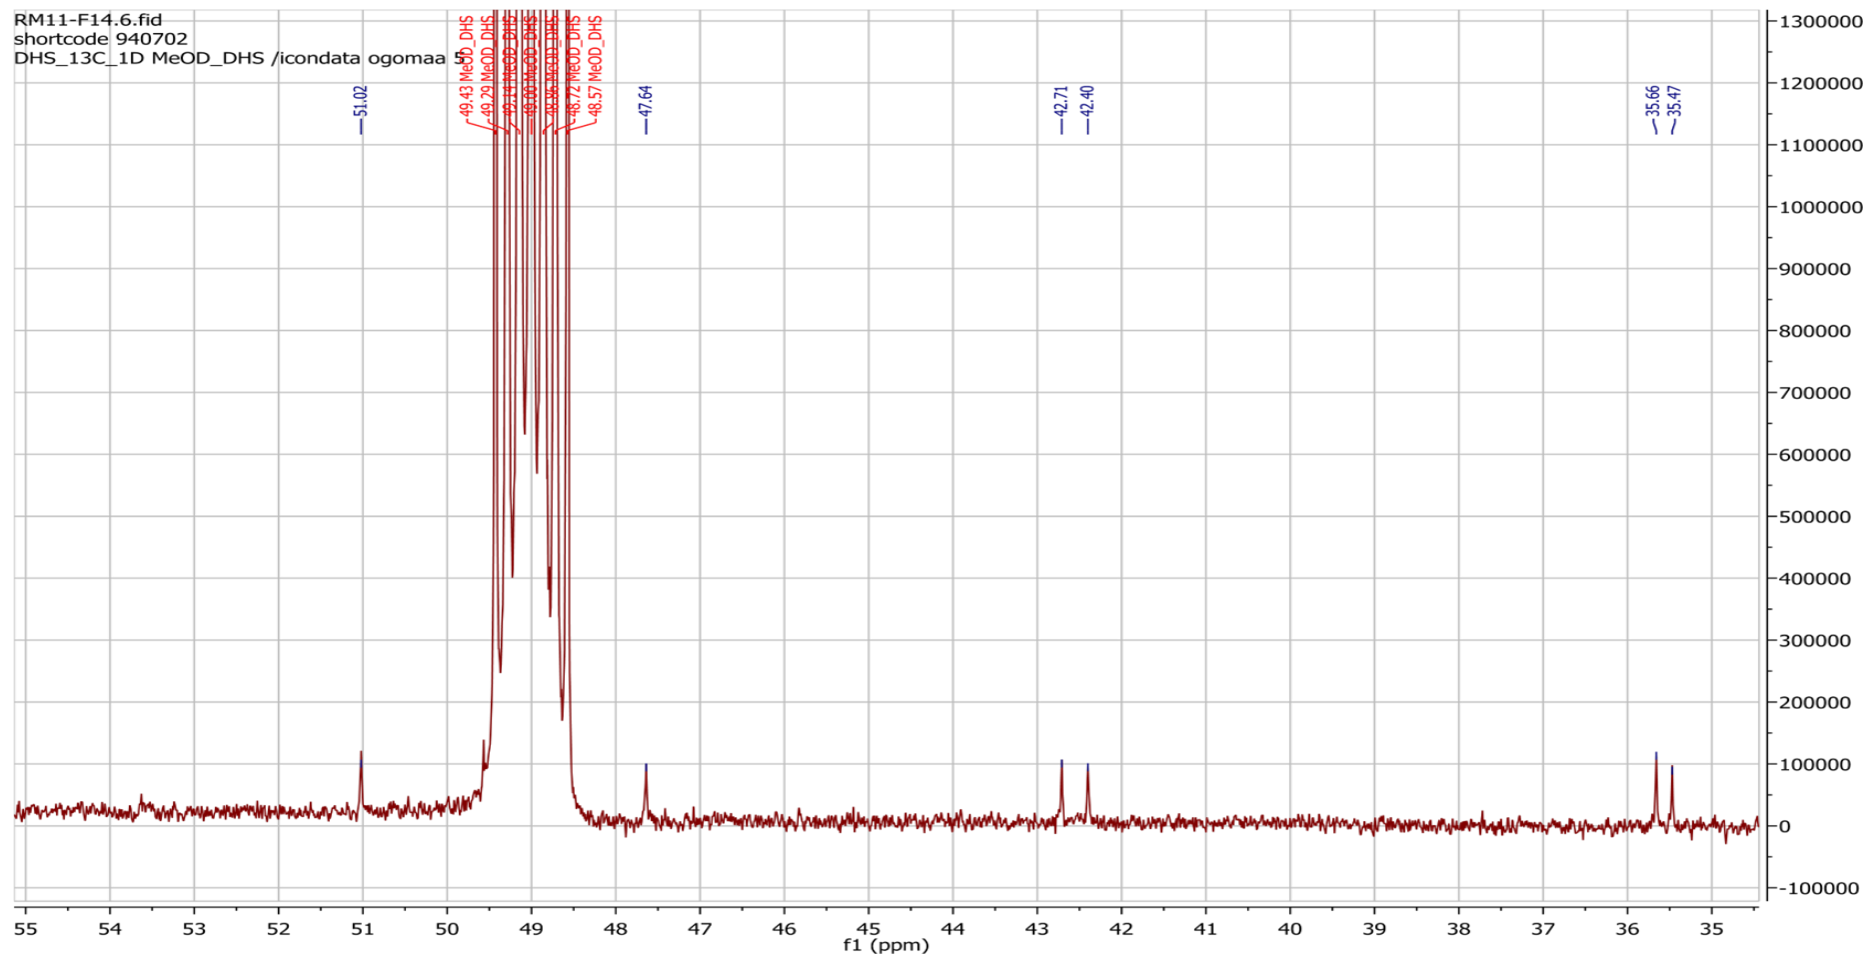

**Figure. S 60** Partial expansion of  $^{13}\text{C}$ -NMR spectrum of compound **6** (150 MHz,  $\text{CD}_3\text{OD}$ )

**Table. S 1 <sup>1</sup>H (600 MHz) and <sup>13</sup>C (150 MHz) NMR spectroscopic data of compound 2 (CD<sub>3</sub>OD  $\delta$  in ppm, *J* in Hz)**

| <b>Position</b>          | <b><math>\delta_H</math> (ppm, <i>m</i>, <i>J</i> Hz)</b> | <b><math>\delta_C</math> (ppm)</b> |
|--------------------------|-----------------------------------------------------------|------------------------------------|
| <b>1</b>                 | --                                                        | 128.3                              |
| <b>2</b>                 | 7.11 ( <i>d</i> , <i>J</i> = 2 Hz)                        | 111.5                              |
| <b>3</b>                 | --                                                        | 149.3                              |
| <b>4</b>                 | --                                                        | 149.8                              |
| <b>5</b>                 | 6.80 ( <i>d</i> , <i>J</i> = 8.4 Hz)                      | 116.4                              |
| <b>6</b>                 | 7.00 ( <i>dd</i> , <i>J</i> = 8.4 Hz, 2.0 Hz)             | 123.2                              |
| <b>7</b>                 | 7.45 ( <i>d</i> , <i>J</i> = 15.6 Hz)                     | 142.0                              |
| <b>8</b>                 | 6.44 ( <i>d</i> , <i>J</i> = 15.6 Hz)                     | 118.7                              |
| <b>9</b>                 | --                                                        | 169.2                              |
| <b>1'</b>                | --                                                        | 131.3                              |
| <b>2'-6'</b>             | 7.05 ( <i>d</i> , <i>J</i> = 8.6 Hz)                      | 130.7                              |
| <b>3'-5'</b>             | 6.73 ( <i>d</i> , <i>J</i> = 8.6 Hz)                      | 116.2                              |
| <b>4'</b>                | --                                                        | 156.9                              |
| <b>7'</b>                | 2.75 ( <i>t</i> , <i>J</i> = 7.6 Hz)                      | 35.8                               |
| <b>8'</b>                | 3.46 ( <i>t</i> , <i>J</i> = 7.6 Hz)                      | 42.5                               |
| <b>3-OCH<sub>3</sub></b> | 3.87 ( <i>s</i> )                                         | 56.4                               |

**Table. S 2 <sup>1</sup>H (600 MHz) and <sup>13</sup>C (150 MHz) NMR spectroscopic data of compound 3 (CD<sub>3</sub>OD,  $\delta$  in ppm, *J* in Hz)**

| <b>Position</b> | <b><math>\delta_H</math> (ppm, <i>m</i>, <i>J</i> Hz)</b> | <b><math>\delta_C</math> (ppm)</b> |
|-----------------|-----------------------------------------------------------|------------------------------------|
| <b>1</b>        | --                                                        | 128.3                              |
| <b>2</b>        | 7.11 ( <i>d</i> , <i>J</i> = 1.9 Hz)                      | 113.4                              |
| <b>3</b>        | 3.88 ( <i>s</i> )                                         | 149.3                              |
| <b>4</b>        | --                                                        | 149.8                              |
| <b>5</b>        | 6.80 ( <i>d</i> , <i>J</i> = 8.2 Hz)                      | 116.5                              |
| <b>6</b>        | 7.02 ( <i>dd</i> , <i>J</i> = 8.2, 1.9 Hz)                | 123.2                              |



|                           |                                            |       |
|---------------------------|--------------------------------------------|-------|
| <b>7</b>                  | 7.45 ( <i>d</i> , <i>J</i> = 15.7 Hz)      | 142.0 |
| <b>8</b>                  | 6.42 ( <i>d</i> , <i>J</i> = 15.7 Hz)      | 118.7 |
| <b>9</b>                  | --                                         | 169.2 |
| <b>1'</b>                 | --                                         | 132.0 |
| <b>2'</b>                 | 6.82 ( <i>d</i> , <i>J</i> = 1.9 Hz)       | 111.5 |
| <b>3'</b>                 | 3.83 ( <i>s</i> )                          | 148.9 |
| <b>4'</b>                 | --                                         | 146.0 |
| <b>5'</b>                 | 6.72 ( <i>d</i> , <i>J</i> = 8.0 Hz)       | 116.2 |
| <b>6'</b>                 | 6.67 ( <i>dd</i> , <i>J</i> = 8.0, 1.9 Hz) | 122.2 |
| <b>7'</b>                 | 2.77 ( <i>t</i> , <i>J</i> = 7.3 Hz)       | 36.2  |
| <b>8'</b>                 | 3.49 ( <i>t</i> , <i>J</i> = 7.3 Hz)       | 42.5  |
| <b>3-OCH<sub>3</sub></b>  | 3.88 ( <i>s</i> )                          | 56.4  |
| <b>3'-OCH<sub>3</sub></b> | 3.83 ( <i>s</i> )                          | 56.3  |

**Table. S 3 <sup>1</sup>H (300 MHz) NMR spectroscopic data of compound 4 (CD<sub>3</sub>OD,  $\delta$  in ppm, *J* in Hz)**

| <b>Position</b> | <b><math>\delta_H</math> (ppm, <i>m</i>, <i>J</i> Hz)</b> |
|-----------------|-----------------------------------------------------------|
| <b>2</b>        | 7.13 ( <i>d</i> , <i>J</i> = 1.4 Hz)                      |
| <b>5</b>        | 6.80 ( <i>d</i> , <i>J</i> = 8.4 Hz)                      |
| <b>6</b>        | 7.01 ( <i>dd</i> , <i>J</i> = 8.4, 2.1 Hz)                |
| <b>7</b>        | 7.42 ( <i>d</i> , <i>J</i> = 15.4 Hz)                     |
| <b>8</b>        | 6.44 ( <i>d</i> , <i>J</i> = 15.4 Hz)                     |
| <b>2'-6'</b>    | 7.21 ( <i>d</i> , <i>J</i> = 8.4 Hz)                      |
| <b>3'-5'</b>    | 6.77 ( <i>d</i> , <i>J</i> = 8.4 Hz)                      |
| <b>7'</b>       | 3.47 ( <i>t</i> , <i>J</i> = 7.0 Hz)                      |
| <b>8'</b>       | 2.76 ( <i>t</i> , <i>J</i> = 7.0 Hz)                      |

**Table. S 4  $^1\text{H}$  (600 MHz) and  $^{13}\text{C}$  (150 MHz) NMR spectroscopic data of compound 5 ( $\text{CD}_3\text{OD}$ ,  $\delta$  in ppm,  $J$  in Hz)**

| <b>Position</b>             | <b><math>\delta_{\text{H}}</math> (ppm, <math>m</math>, <math>J</math> Hz)</b> | <b><math>\delta_{\text{C}}</math> (ppm)</b> |
|-----------------------------|--------------------------------------------------------------------------------|---------------------------------------------|
| <b>1</b>                    | --                                                                             | 126.2                                       |
| <b>2</b>                    | 7.24 ( $d$ , $J = 2.0$ Hz)                                                     | 112.5                                       |
| <b>3</b>                    | --                                                                             | 148.9                                       |
| <b>4</b>                    | --                                                                             | 147.5                                       |
| <b>5</b>                    | 6.71 ( $d$ , $J = 8.2$ Hz)                                                     | 115.2                                       |
| <b>6</b>                    | 7.01 ( $dd$ , $J = 8.2, 2.0$ Hz)                                               | 121.0                                       |
| <b>7</b>                    | 7.24 ( $s$ )                                                                   | 125.3                                       |
| <b>8</b>                    | --                                                                             | 141.6                                       |
| <b>9</b>                    | --                                                                             | 168.8                                       |
| <b>1'</b>                   | --                                                                             | 130.8                                       |
| <b>2-6'</b>                 | 6.85 ( $d$ , $J = 8.5$ Hz)                                                     | 130.7                                       |
| <b>3' and 5'</b>            | 6.58 ( $d$ , $J = 8.5$ Hz)                                                     | 116.3                                       |
| <b>4'</b>                   | --                                                                             | 156.9                                       |
| <b>7'</b>                   | 2.65 ( $t$ , $J = 6.9$ Hz)                                                     | 35.6                                        |
| <b>8'</b>                   | 3.46 ( $dd$ , $J = 13.0, 2.0$ Hz)                                              | 42.1                                        |
| <b>1''</b>                  | --                                                                             | 131.9                                       |
| <b>2''</b>                  | 7.29 ( $d$ , $J = 2.0$ Hz)                                                     | 113.7                                       |
| <b>3''</b>                  | --                                                                             | 150.5                                       |
| <b>4''</b>                  | --                                                                             | 149.5                                       |
| <b>5''</b>                  | 6.73 ( $d$ , $J = 8.2$ Hz)                                                     | 116.2                                       |
| <b>6''</b>                  | 7.03 ( $dd$ , $J = 8.2, 2.0$ Hz)                                               | 125.5                                       |
| <b>7''</b>                  | 7.45 ( $d$ , $J = 15.7$ Hz)                                                    | 141.1                                       |
| <b>8''</b>                  | 6.48 ( $d$ , $J = 15.7$ Hz)                                                    | 122.2                                       |
| <b>9''</b>                  | --                                                                             | 165.5                                       |
| <b>1'''</b>                 | --                                                                             | 131.3                                       |
| <b>2''' and 6'''</b>        | 7.05 ( $d$ , $J = 8.5$ Hz)                                                     | 130.7                                       |
| <b>3''' and 5'''</b>        | 6.72 ( $d$ , $J = 8.5$ Hz)                                                     | 116.3                                       |
| <b>4'''</b>                 | --                                                                             | 156.9                                       |
| <b>7'''</b>                 | 2.75 ( $t$ , $J = 7.4$ Hz)                                                     | 35.8                                        |
| <b>8'''</b>                 | 3.47 ( $dd$ , $J = 13.0, 6.0$ Hz)                                              | 42.6                                        |
| <b>3-OCH<sub>3</sub></b>    | 3.93 ( $s$ )                                                                   | 56.0                                        |
| <b>3'''-OCH<sub>3</sub></b> | 3.67 ( $s$ )                                                                   | 56.4                                        |

**Table. S 5**  $^1\text{H}$  (600 MHz) and  $^{13}\text{C}$  (150 MHz) NMR spectroscopic data of compound **6** ( $\text{CD}_3\text{OD}$ ,  $\delta$  in ppm,  $J$  in Hz)

| <b>Position</b>      | $\delta_H$ (ppm, <i>m</i> , <i>J</i> Hz) | $\delta_C$ (ppm) |
|----------------------|------------------------------------------|------------------|
| <b>1</b>             | --                                       | 174.5            |
| <b>2</b>             | 3.68 (d, $J = 4.0$ Hz)                   | 51.0             |
| <b>3</b>             | 4.34 (d, $J = 4.0$ Hz)                   | 47.6             |
| <b>4</b>             | --                                       | 135.9            |
| <b>5</b>             | 6.70 (d, $J = 2.0$ Hz)                   | 112.5            |
| <b>6</b>             | --                                       | 148.9            |
| <b>7</b>             | --                                       | 146.3            |
| <b>8</b>             | 6.65 (d, $J = 8.4$ Hz)                   | 115.9            |
| <b>9</b>             | 6.41 (dd, $J = 8.2, 2.0$ Hz)             | 121.4            |
| <b>1'</b>            | 3.24 (m)                                 | 42.4             |
| <b>2'</b>            | 2.48 (m)                                 | 35.5             |
| <b>3'</b>            | --                                       | 131.2            |
| <b>4' and 8'</b>     | 6.83 (d, $J = 8.4$ Hz)                   | 130.7            |
| <b>5' and</b>        | 6.68 (d, $J = 8.4$ Hz)                   | 116.2            |
| <b>6'</b>            | --                                       | 156.8            |
| <b>6-OCH3</b>        | 3.75 (s)                                 | 56.3             |
| <b>1''</b>           | --                                       | 170.4            |
| <b>2''</b>           | 7.20 (s)                                 | 134.7            |
| <b>3''</b>           | --                                       | 132.6            |
| <b>4''</b>           | --                                       | 127.6            |
| <b>5''</b>           | 6.88 (s)                                 | 113.2            |
| <b>6''</b>           | --                                       | 148.2            |
| <b>7''</b>           | --                                       | 149.6            |
| <b>8''</b>           | 6.52 (s)                                 | 117.2            |
| <b>9''</b>           | --                                       | 124.9            |
| <b>1'''</b>          | 3.37 (m)                                 | 42.7             |
| <b>2'''</b>          | 2.70 (t, $J = 7.4$ Hz)                   | 35.7             |
| <b>3'''</b>          | --                                       | 131.4            |
| <b>4''' and 8'''</b> | 6.98 (d, $J = 8.4$ Hz)                   | 130.8            |
| <b>5''' and 7'''</b> | 6.64 (d, $J = 8.4$ Hz)                   | 116.2            |
| <b>6'''</b>          | --                                       | 156.9            |
| <b>6''-OCH3</b>      | 3.90 (s)                                 | 56.6             |
